# Supplementary material for: Tandem indium( iii )-catalyzed cyclization and intermolecular hydrofunctionalization of 1,6-enynes
Source: Royal Society of Chemistry journal article supplement (doi:10.1039/d5qo01388g), 2025-12-22

## Supplementary Information

### **Tandem indium(III)-catalyzed cycloisomerization and intermolecular hydrofunctionalization of 1,6-enynes**

Raquel Pérez-Guevara, Diego Folgueira-Iravedra, Lorena Alonso-Marañón,  
M. Montserrat Martínez and José Pérez Sestelo\*

*CICA – Centro Interdisciplinar de Química e Bioloxía and Departamento de Química, Universidade da  
Coruña, 15071 A Coruña, Spain*

#### **Table of Contents**

|                                                                                                                                                            |     |
|------------------------------------------------------------------------------------------------------------------------------------------------------------|-----|
| 1. General methods.....                                                                                                                                    | S2  |
| 2. Synthesis and characterization of starting 1,6-enynes .....                                                                                             | S2  |
| 3. General procedure for indium(III)-catalyzed cycloisomerization and intermolecular hydrofunctionalization of 1,6-enynes .....                            | S5  |
| 4. Synthesis and characterization data for the reaction products .....                                                                                     | S6  |
| 5. <sup>1</sup> H NMR data of deuterated experiments .....                                                                                                 | S16 |
| 6. <sup>1</sup> H NMR spectra of the reaction of 1,6-enyne (Z)-4 with InI <sub>3</sub> (5 mol%) and 1,2,3-trimethoxybenzene at different temperatures..... | S17 |
| 7. References.....                                                                                                                                         | S18 |
| 8. <sup>1</sup> H NMR and <sup>13</sup> C NMR spectra for products.....                                                                                    | S19 |

## 1. General methods

All reactions were carried out in flame-dried glassware, under argon atmosphere, using standard gas-tight syringes, cannulae and septa. Reaction temperatures refer to external bath temperatures. All the heating reactions were heated in an oil bath or an aluminium heating block. Low temperature reactions were carried out into an Cryocool-Inmersion Cooler C-100 II from Neslab. Toluene was distilled from sodium/benzophenone. THF and dichloromethane were dried via MBraun MB-SPS 800 Solvent Purification System. All purchased reagents were used without further purification unless otherwise noted. Indium(III) iodide (99.998%) was used under argon in a glove box Inert Pure Lab<sup>He</sup>. Completion of the reactions and reaction times were estimated by thin-layer chromatography (TLC) using pre-coated silica gel foils (Alugram® Xtra SIL G/UV254, 0.20 mm thick), UV light as the visualizing agent, and ethanolic phosphomolybdic acid as the developing agent. Flash column chromatography was performed using 230-400 mesh silica gel. <sup>1</sup>H NMR and <sup>13</sup>C NMR spectra were recorded at room temperature in CDCl<sub>3</sub> using a 300 and 400 MHz Bruker Advance spectrometer and calibrated to the solvent peak. DEPT data were used to assign carbon types. Chemical shifts are reported in ppm (δ) relative to the solvent CDCl<sub>3</sub> (δ<sub>H</sub> 7.26 ppm and δ<sub>C</sub> 77.1 ppm). The data of HRMS was obtained with a QSTAR Elite hybrid quadrupole time-of-flight (TOF) ESI mass spectrometer, operating in the positive ionization mode.

## 2. Synthesis and characterization of starting 1,6-enynes

### Dimethyl 2-(3-methylbut-2-en-1-yl)-2-(prop-2-yn-1-yl) malonate (**1**).<sup>1</sup>

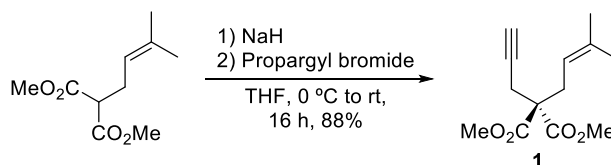

A suspension of NaH (580 mg, 24.2 mmol, 95%) in THF (70 mL) was cooled to 0 °C and dimethyl 2-(3-methylbut-2-en-1-yl) malonate<sup>2</sup> (4.40 g, 21.9 mmol) in THF (10 mL) was dropwise added. Upon complete addition, propargyl bromide (80% sol in toluene, 3.60 mL, 24.2 mmol) was added dropwise and reaction mixture was stirred at rt for 16 h. The reaction mixture was poured into a mixture of H<sub>2</sub>O (30 mL) and EtOAc (30 mL). After separation of the layers, the aqueous phase was extracted with EtOAc (2 × 30 mL) and the combined organic layer was dried with anhydrous MgSO<sub>4</sub>, filtered and the solvent evaporated under reduced pressure. After purification by column chromatography (5% EtOAc/hexane) **1** (4.5 g, 88%) was obtained as a colourless oil.

R<sub>f</sub> = 0.22 (10% EtOAc/hexane). <sup>1</sup>H NMR (400 MHz, CDCl<sub>3</sub>) δ 4.90 (t, *J* = 7.8 Hz, 1H), 3.73 (s, 6H), 2.80-2.76 (m, 4H), 2.00 (t, *J* = 2.7 Hz, 1H), 1.70 (s, 3H), 1.65 (s, 3H). <sup>13</sup>C NMR (100 MHz, CDCl<sub>3</sub>) δ 170.5 (2×C), 137.0 (C), 117.0 (CH), 79.3 (C), 71.2 (CH), 57.2 (C), 52.7 (2×CH<sub>3</sub>), 30.8 (CH<sub>2</sub>), 26.1 (CH<sub>3</sub>), 22.5 (CH<sub>2</sub>), 17.9 (CH<sub>3</sub>).

#### 4-Methyl-*N*-(3-methylbut-2-en-1-yl)-*N*-(prop-2-yn-1-yl)benzenesulfonamide (**2**).<sup>3</sup>

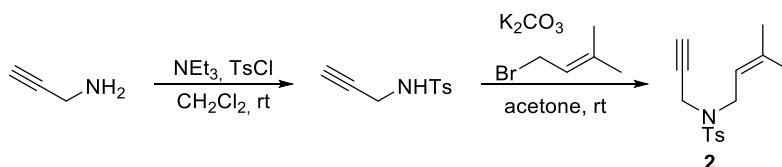

To a stirred solution of propargylamine (1.16 mL, 18.16 mmol) in CH<sub>2</sub>Cl<sub>2</sub> (25 mL), TsCl (3.15 g, 16.50 mmol) and NEt<sub>3</sub> (5.73 mL, 41.25 mmol) were sequentially added and the resulting mixture was stirred overnight at rt. The reaction mixture was then extracted with CH<sub>2</sub>Cl<sub>2</sub> (2 × 20 mL), and the combined organic layer was washed with saturated aqueous NaCl (20 mL), dried over anhydrous MgSO<sub>4</sub>, filtered and the solvent evaporated under reduced pressure to afford, after purification by column chromatography (15-30% EtOAc/hexane) 4-methyl-*N*-(prop-2-yn-1-yl)-benzenesulfonamide (2.76 g, 82%) as a white solid.

K<sub>2</sub>CO<sub>3</sub> (1.34 g, 9.70 mmol), 1-bromo-3-methylbut-2-ene (1.12 mL, 9.7 mmol) were sequentially added to a stirred solution of 4-methyl-*N*-(prop-2-yn-1-yl)-benzenesulfonamide (1.01 g, 4.85 mmol) in acetone (8 mL) and the resulting mixture was stirred at rt for 24 h. After completion, K<sub>2</sub>CO<sub>3</sub> was removed by filtration in vacuum and the solvent was evaporated under reduced pressure. The residue was dissolved in ethyl ether (80 mL), washed with saturated aqueous NaCl (40 mL), dried over anhydrous MgSO<sub>4</sub>, filtered and the solvent evaporated under reduced pressure to afford, after purification by column chromatography (5% EtOAc/hexane) **2** (1.23 g, 91%) as a colourless oil.

R<sub>f</sub> = 0.45 (20% EtOAc/hexane). <sup>1</sup>H NMR (300 MHz, CDCl<sub>3</sub>): δ 7.71 (d, *J* = 8.3 Hz, 2H), 7.26 (d, *J* = 8.1 Hz, 2H), 5.07 (t, *J* = 7.3 Hz, 1H), 4.04 (d, *J* = 2.5 Hz, 2H), 3.79 (d, *J* = 7.3 Hz, 2H), 2.39 (s, 3H), 1.98 (t, *J* = 2.5 Hz, 1H), 1.70 (s, 3H), 1.64 (s, 3H). <sup>13</sup>C NMR (75 MHz, CDCl<sub>3</sub>): δ 143.4 (C), 139.0 (C), 136.2 (C), 129.4 (2×CH), 127.8 (2×CH), 117.9 (CH), 77.1 (C), 73.4 (CH), 43.9 (CH<sub>2</sub>), 35.4 (CH<sub>2</sub>), 25.9 (CH<sub>3</sub>), 21.5 (CH<sub>3</sub>), 17.8 (CH<sub>3</sub>).

#### Dimethyl 2-cinnamyl-2-(prop-2-yn-1-yl)malonate (*E*)-**4**.<sup>4</sup>

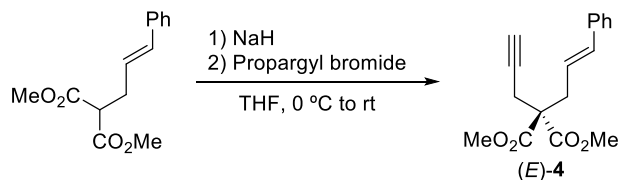

A suspension of NaH (86 mg, 3.21 mmol, 95% dry) in dry THF (10 mL) was cooled to 0 °C and a solution of (*E*)-dimethyl 2-cinnamylmalonate<sup>5</sup> (725 mg, 2.92 mmol) in dry THF (6 mL) was added dropwise. After stirring at that temperature for 1h, propargyl bromide (0.360 mL, 3.21 mmol) was added dropwise and the reaction mixture was allowed to warm to rt overnight. The resulting mixture was diluted with H<sub>2</sub>O (20 mL) and the aqueous phase was extracted with EtOAc (2 × 15 mL). The combined organic extracts were washed with saturated aqueous NaCl (15 mL), dried over anhydrous MgSO<sub>4</sub>, filtered and the solvent evaporated under reduced pressure to afford, after purification by column chromatography (10% EtOAc/hexane) (*E*)-**4** (0.712 g, 71%) as a pale yellow oil.

R<sub>f</sub> = 0.39 (10% EtOAc/hexane). <sup>1</sup>H NMR (300 MHz, CDCl<sub>3</sub>): δ 7.29-7.14 (m, 5H), 6.47 (d, *J* = 15.7 Hz, 1H), 5.95 (dt, *J* = 15.7, 7.7 Hz, 1H), 3.71 (s, 6H), 2.91 (dd, *J* = 7.6, 1.3 Hz, 2H), 2.80 (d, *J* = 2.7 Hz, 2H), 2.01 (t, *J* = 2.7 Hz, 1H). <sup>13</sup>C NMR (75 MHz, CDCl<sub>3</sub>): δ 170.2 (2×C), 137.0 (C), 134.7 (CH), 128.5 (2×CH), 127.6 (CH), 126.3 (2×CH), 123.1 (CH), 78.8 (C), 71.7 (C), 57.2 (CH), 52.9 (2×CH<sub>3</sub>), 35.9 (CH<sub>2</sub>), 22.9 (CH<sub>2</sub>).

**Dimethyl (Z)-2-(3-phenylallyl)-2-(prop-2-yn-1-yl)malonate ((Z)-4).**

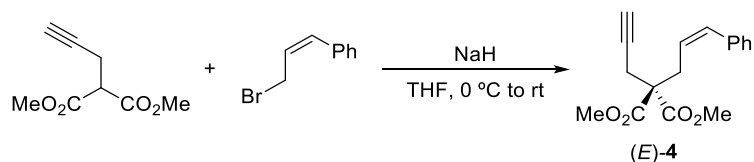

A suspension of NaH (131 mg, 4.74 mmol, 90% dry) in dry THF (14 mL) was cooled to 0 °C and dimethyl propargylmalonate (672 mg, 3.95 mmol) was added dropwise. After stirring at that temperature for 1h, a solution of (Z)-cinnamyl bromide (0.933 g, 4.74 mmol) in dry THF (6 mL) was added dropwise and the reaction mixture was allowed to warm to rt overnight. The resulting mixture was diluted with H<sub>2</sub>O (20 mL) and the aqueous phase was extracted with ethyl ether (2 x 15 mL). The combined organic extracts were washed with saturated aqueous NaCl (15 mL), dried over anhydrous MgSO<sub>4</sub>, filtered and the solvent evaporated under reduced pressure to afford, after purification by column chromatography (3-10% EtOAc/hexane) (Z)-4 (0.931 g, 82%) as a yellow oil.

R<sub>f</sub> = 0.39 (20% EtOAc/hexane). <sup>1</sup>H NMR (300 MHz, CDCl<sub>3</sub>): δ 7.36-7.19 (m, 5H), 6.60 (d, *J* = 11.7 Hz, 1H), 5.48 (dt, *J* = 11.7, 7.5 Hz, 1H), 3.67 (s, 6H), 3.13 (dd, *J* = 7.5, 1.8 Hz, 2H), 2.83 (d, *J* = 2.7 Hz, 2H), 1.87 (t, *J* = 2.7 Hz, 1H). <sup>13</sup>C NMR (75 MHz, CDCl<sub>3</sub>): δ 170.2 (2×C), 136.8 (C), 133.1 (CH), 128.8 (2×CH), 128.2 (2×CH), 126.9 (CH), 124.7 (CH), 78.5 (C), 71.8 (CH), 57.0 (C), 52.8 (2×CH<sub>3</sub>), 30.7(CH<sub>2</sub>), 22.9 (CH<sub>2</sub>). HRMS (ESI) *m/z* calcd for C<sub>17</sub>H<sub>18</sub>O<sub>4</sub>Na [M+Na]<sup>+</sup> 309.1103; found 309.1109.

### 3. General procedure for tandem indium(III)-catalyzed cycloisomerization and intermolecular hydrofunctionalization of 1,6-enynes

In a capped vial filled with argon and equipped with a magnetic stir bar,  $\text{InI}_3$  (5 mol%) was placed and the corresponding solvent (2 mL) was added. The suspension was cooled down to  $-20\text{ }^\circ\text{C}$  and a solution of 1,6-enyne (1 equiv.) and the nucleophile (5 equiv.) in dichloromethane or dichloroethane, adjusting the volume until the final concentration of the reaction mixture was  $\sim 0.035\text{ M}$ , was added dropwise. The resulting mixture was left warming at rt or heated ( $40\text{--}60\text{ }^\circ\text{C}$ ) until the starting material was consumed (TLC and/or GC-MS). The solvent was evaporated in vacuum and the residue was purified by column chromatography (EtOAc/hexane) to afford the corresponding product (Schemes 1 and 2).

**Scheme 1.** Tandem indium-catalyzed cyclizations and intermolecular additions to 1,6-enynes **1** and **2**.

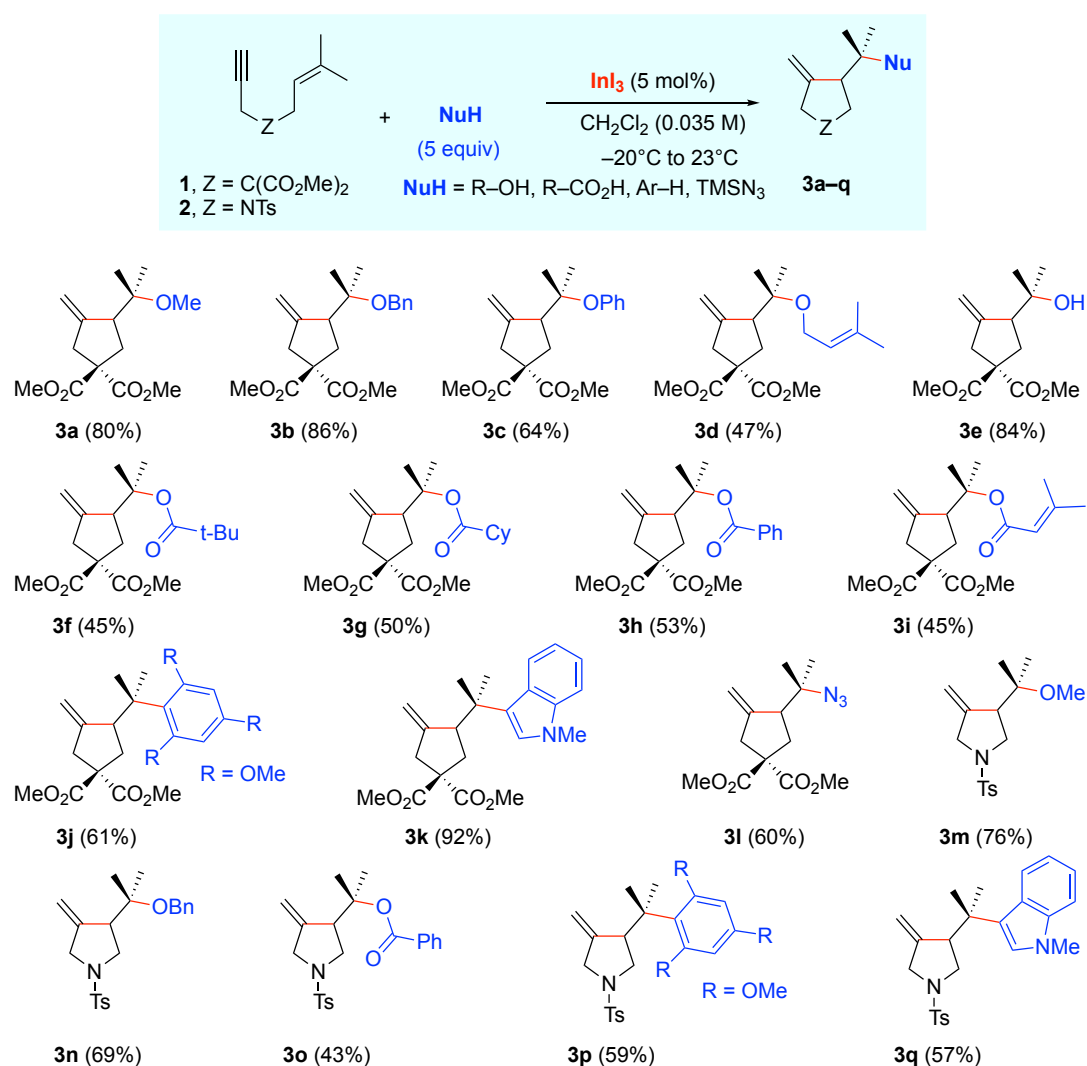

**Scheme 2.** Tandem indium(III)-catalyzed 1,6-ene-yne cyclizations and intermolecular additions to 1,6-enynes (*E*)-**4** and (*Z*)-**4**.

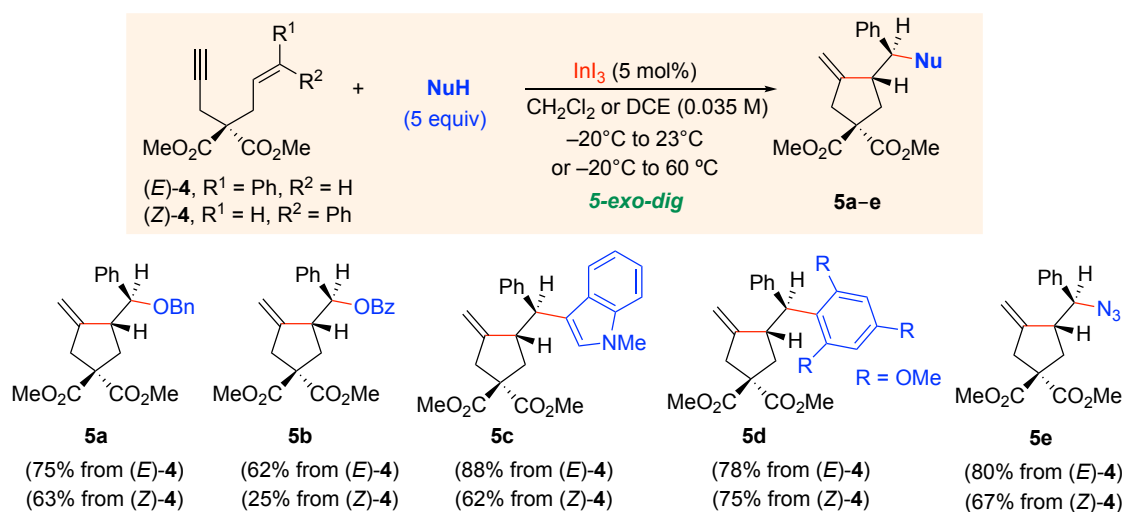

#### 4. Synthesis and characterization data for reaction products

##### Dimethyl 3-(2-methoxypropan-2-yl)-4-methylenecyclopentane-1,1-dicarboxylate (**3a**).<sup>6</sup>

Following the general procedure, the reaction of 1,6-enyne **1** (50 mg, 0.21 mmol) and MeOH (40  $\mu\text{L}$ , 1.05 mmol) with  $\text{InI}_3$  (5.2 mg, 0.01 mmol) in  $\text{CH}_2\text{Cl}_2$  (6.6 mL) was stirred at rt for 21 h. After purification by column chromatography (2-10% EtOAc/hexane) **3a** (43 mg, 80%) was obtained as a colourless oil.

$R_f$  = 0.26 (10% EtOAc/hexane).  $^1\text{H}$  NMR (300 MHz,  $\text{CDCl}_3$ )  $\delta$  5.03 (br s, 1H), 4.97 (br s, 1H), 3.72 (s, 3H), 3.71 (s, 3H), 3.18 (s, 3H), 2.95-2.78 (m, 3H), 2.55 (ddd,  $J$  = 13.5, 8.3, 1.7 Hz, 1H), 2.00 (dd,  $J$  = 13.7, 9.3 Hz, 1H), 1.17 (s, 3H), 1.11 (s, 3H).  $^{13}\text{C}$  NMR (75 MHz,  $\text{CDCl}_3$ )  $\delta$  172.1 (C), 172.0 (C), 148.2 (C), 110.6 ( $\text{CH}_2$ ), 76.8 (C), 58.6 (C), 52.7 ( $2\times\text{CH}_3$ ), 49.1 (CH), 49.0 ( $\text{CH}_3$ ), 43.4 ( $\text{CH}_2$ ), 36.0 ( $\text{CH}_2$ ), 22.6 ( $\text{CH}_3$ ), 22.2 ( $\text{CH}_3$ ).

**1a**:<sup>7</sup>  $R_f$  = 0.22 (10% EtOAc/hexane).  $^1\text{H}$  NMR (400 MHz,  $\text{CDCl}_3$ )  $\delta$  5.72 (s, 1H), 5.39 (s, 1H), 3.73 (s, 6H), 3.19 (s, 2H), 3.05 (s, 2H), 1.82 (s, 3H), 1.78 (s, 3H).  $^{13}\text{C}$  NMR (100 MHz,  $\text{CDCl}_3$ )  $\delta$  172.6 ( $2\times\text{C}$ ), 138.8 (C), 135.7 (CH), 124.4 (CH), 120.7 (CH), 59.3 (C), 52.8 ( $2\times\text{CH}_3$ ), 43.3 ( $\text{CH}_2$ ), 40.3 ( $\text{CH}_2$ ), 27.3 ( $\text{CH}_3$ ), 19.8 ( $\text{CH}_3$ ). HRMS (ESI)  $m/z$  calcd for  $\text{C}_{13}\text{H}_{18}\text{O}_4\text{Na}$   $[\text{M}+\text{Na}]^+$  261.1103; found 261.1098.

##### Dimethyl 3-(2-(benzyloxy)propan-2-yl)-4-methylenecyclopentane-1,1-dicarboxylate (**3b**).<sup>8</sup>

Following the general procedure, the reaction of 1,6-enyne **1** (50 mg, 0.21 mmol) and benzyl alcohol (11  $\mu\text{L}$ , 1.05 mmol) with  $\text{InI}_3$  (5.2 mg, 0.01 mmol) in  $\text{CH}_2\text{Cl}_2$  (6.6 mL) was stirred at rt for 4 h. After purification by column chromatography (5% EtOAc/hexane) **3b** (63 mg, 86%) was obtained as a colourless oil.  $R_f$  = 0.29 (10% EtOAc/hexane).  $^1\text{H}$  NMR (300 MHz,  $\text{CDCl}_3$ )  $\delta$  7.33 (d,  $J$  = 4.3 Hz, 4H), 7.29-7.21 (m, 1H), 5.05 (m, 2H), 4.46 (s, 2H), 3.73 (s, 3H), 3.72 (s, 3H), 2.89-2.84 (m, 3H), 2.61 (ddd,  $J$  = 13.7, 8.9, 2.0 Hz, 1H), 2.11 (dd,  $J$  = 13.7, 9.4 Hz, 1H), 1.30 (s, 3H), 1.24 (s, 3H).  $^{13}\text{C}$  NMR (75 MHz,  $\text{CDCl}_3$ )  $\delta$  172.1 (C), 172.0 (C), 148.2 (C), 139.6 (C), 128.3 ( $2\times\text{CH}$ ), 127.2 ( $2\times\text{CH}$ ), 127.1 (CH), 110.8 ( $\text{CH}_2$ ), 77.5 (C), 63.5 ( $\text{CH}_2$ ), 58.6 (C), 52.8 ( $\text{CH}_3$ ), 52.7 ( $\text{CH}_3$ ), 50.0 (CH), 43.5 ( $\text{CH}_2$ ), 36.1 ( $\text{CH}_2$ ), 23.3 ( $\text{CH}_3$ ), 22.7 ( $\text{CH}_3$ ).

**Dimethyl 3-methylene-4-(2-phenoxypropan-2-yl)cyclopentane-1,1-dicarboxylate (3c).**

Following the general procedure, the reaction of 1,6-enyne **1** (50 mg, 0.21 mmol) and phenol (94 mg, 1.05 mmol) with  $\text{InI}_3$  (5.2 mg, 0.01 mmol) in  $\text{CH}_2\text{Cl}_2$  (6.6 mL) was stirred at rt for 19 h. After purification by column chromatography (2-10% EtOAc/hexane) **3c** (45 mg, 64%) as a light pink oil.

$R_f$  = 0.52 (10% EtOAc/hexane). IR (ATR)  $\nu_{\text{max}}$  = 2953, 1734  $\text{cm}^{-1}$ .  $^1\text{H}$  NMR (300 MHz,  $\text{CDCl}_3$ )  $\delta$  7.29-7.20 (m, 2H), 7.09-7.02 (m, 1H), 6.97 (d,  $J$  = 7.0 Hz, 2H), 5.15 (d,  $J$  = 6.1 Hz, 2H), 3.74 (s, 3H), 3.73 (s, 3H), 3.06-2.85 (m, 3H), 2.70 (ddd,  $J$  = 13.8, 8.5, 1.6 Hz, 1H), 2.23 (dd,  $J$  = 13.1, 9.0 Hz, 1H), 1.27 (s, 3H), 1.26 (s, 3H).  $^{13}\text{C}$  NMR (75 MHz,  $\text{CDCl}_3$ )  $\delta$  172.1 (C), 172.0 (C), 155.0 (C), 148.2 (C), 129.0 (2 $\times$ CH), 124.1 (2 $\times$ CH), 123.4 (CH), 111.4 ( $\text{CH}_2$ ), 82.2 (C), 58.7 (C), 52.8 (2 $\times$ CH<sub>3</sub>), 51.9 (CH), 43.5 ( $\text{CH}_2$ ), 36.3 ( $\text{CH}_2$ ), 24.7 (CH<sub>3</sub>), 23.5 (CH<sub>3</sub>). HRMS (ESI)  $m/z$  calcd for  $\text{C}_{19}\text{H}_{24}\text{O}_5\text{Na}$   $[\text{M}+\text{Na}]^+$  355.1521; found 355.1508.

**Dimethyl 3-(2-((3-methylbut-2-en-1-yl)oxy)propan-2-yl)-4-methylenecyclopentane-1,1-dicarboxylate (3d).**

Following the general procedure, the reaction of 1,6-enyne **1** (50 mg, 0.21 mmol) and 3-methylbut-2-en-1-ol (11  $\mu\text{L}$ , 1.05 mmol) with  $\text{InI}_3$  (5.2 mg, 0.01 mmol) in  $\text{CH}_2\text{Cl}_2$  (6.6 mL) was stirred at rt for 19 h. After purification by column chromatography (5-10% EtOAc/hexane) **3d** (32 mg, 47%) was obtained as a colourless oil.

$R_f$  = 0.23 (10% EtOAc/hexane). IR (ATR)  $\nu_{\text{max}}$  = 2921, 1735  $\text{cm}^{-1}$ .  $^1\text{H}$  NMR (300 MHz,  $\text{CDCl}_3$ )  $\delta$  5.27 (t,  $J$  = 6.7 Hz, 1H), 5.02 (m, 2H), 3.89 (t,  $J$  = 5.6 Hz, 2H), 3.73 (s, 3H), 3.72 (s, 3H), 2.94-2.82 (m, 3H), 2.60-2.50 (m, 1H), 2.01 (dd,  $J$  = 13.2,  $J$  = 9.6 Hz, 1H), 1.72 (s, 3H), 1.65 (s, 3H), 1.23 (s, 3H), 1.15 (s, 3H).  $^{13}\text{C}$  NMR (75 MHz,  $\text{CDCl}_3$ )  $\delta$  172.1 (C), 172.0 (C), 148.2 (C), 135.4 (C), 122.0 (CH), 110.5 ( $\text{CH}_2$ ), 76.8 (C), 58.6 (C), 58.1 ( $\text{CH}_2$ ), 52.8 (CH<sub>3</sub>), 52.7 (CH<sub>3</sub>), 49.1 (CH), 43.4 ( $\text{CH}_2$ ), 36.1 ( $\text{CH}_2$ ), 25.9 (CH<sub>3</sub>), 23.4 (CH<sub>3</sub>), 22.8 (CH<sub>3</sub>), 18.1 (CH<sub>3</sub>). HRMS (ESI)  $m/z$  calcd for  $\text{C}_{18}\text{H}_{28}\text{O}_5\text{Na}$   $[\text{M}+\text{Na}]^+$  347.1834; found 347.1831.

**Dimethyl 3-(2-hydroxypropan-2-yl)-4-methylenecyclopentane-1,1-dicarboxylate (3e).<sup>6</sup>**

Following the general procedure, the reaction of 1,6-enyne **1** (50 mg, 0.21 mmol) and  $\text{H}_2\text{O}$  (20  $\mu\text{L}$ , 1.05 mmol) with  $\text{InI}_3$  (5.2 mg, 0.01 mmol) in  $\text{CH}_2\text{Cl}_2$  (6.6 mL) was stirred at rt for 20 h. After purification by column chromatography (20-30% EtOAc/hexane) **3e** (45 mg, 84%) was obtained as a colourless oil.

$R_f$  = 0.28 (30% EtOAc/hexane).  $^1\text{H}$  NMR (300 MHz,  $\text{CDCl}_3$ )  $\delta$  5.10 (br s, 1H), 5.02 (br s, 1H), 3.73 (s, 3H), 3.72 (s, 3H), 2.87 (s, 2H), 2.72-2.58 (m, 2H), 2.05-1.95 (m, 1H), 1.61 (br s, 1H), 1.24 (s, 3H), 1.19 (s, 3H).  $^{13}\text{C}$  NMR (75 MHz,  $\text{CDCl}_3$ )  $\delta$  171.9 (C), 171.9 (C), 148.5 (C), 111.3 (CH), 72.6 (C), 58.8 (C), 52.8 (2 $\times$ CH<sub>3</sub>), 52.6 (CH), 43.5 ( $\text{CH}_2$ ), 36.2 ( $\text{CH}_2$ ), 28.1 (CH<sub>3</sub>), 26.1 (CH<sub>3</sub>).

**Dimethyl 3-methylene-4-(2-(pivaloyloxy)propan-2-yl)cyclopentane-1,1-dicarboxylate (3f).**

Following the general procedure, the reaction of 1,6-enyne **1** (50 mg, 0.21 mmol) and pivalic acid (107 mg, 1.05 mmol) with  $\text{InI}_3$  (5.2 mg, 0.01 mmol) in  $\text{CH}_2\text{Cl}_2$  (6.6 mL) was stirred at rt for 1 h. After purification by column chromatography (5% EtOAc/hexane) **3f** (32 mg, 45%) was obtained as a light yellow oil.

$R_f$  = 0.41 (10% EtOAc/hexane). IR (ATR)  $\nu_{\text{max}}$  = 2923, 1737  $\text{cm}^{-1}$ .  $^1\text{H}$  NMR (300 MHz,  $\text{CDCl}_3$ )  $\delta$  5.09 (s, 1H), 4.98 (s, 1H), 3.74 (s, 3H), 3.73 (s, 3H), 3.10 (t,  $J$  = 8.9 Hz, 1H), 2.90 (s, 2H), 2.63 (dd,  $J$  = 13.7, 8.3 Hz, 1H), 2.03 (dd,  $J$  = 14.5, 9.3 Hz, 1H), 1.51 (s, 3H), 1.46 (s, 3H), 1.15 (s, 9H).  $^{13}\text{C}$  NMR (75 MHz,  $\text{CDCl}_3$ )  $\delta$  177.7 (C), 171.9 (C), 171.7 (C), 147.5 (C), 111.5 ( $\text{CH}_2$ ), 83.4 (C), 58.6 (C), 52.8 (2 $\times$ CH<sub>3</sub>), 50.8 (CH), 43.7 ( $\text{CH}_2$ ), 39.5 (C), 35.8 ( $\text{CH}_2$ ), 27.2 (3 $\times$ CH<sub>3</sub>), 23.5 (CH<sub>3</sub>), 23.2 (CH<sub>3</sub>). HRMS (ESI)  $m/z$  calcd for  $\text{C}_{18}\text{H}_{28}\text{O}_6\text{Na}$   $[\text{M}+\text{Na}]^+$  363.1784; found 363.1779.

**Dimethyl 3-(2-((cyclohexanecarbonyl)oxy)propan-2-yl)-4-methylenecyclopentane-1,1-dicarboxylate (3g).**

Following the general procedure, the reaction of 1,6-enyne **1** (50 mg, 0.21 mmol) and cyclohexanecarboxylic acid (130  $\mu$ L, 1.05 mmol) with  $\text{InI}_3$  (5.2 mg, 0.01 mmol) in  $\text{CH}_2\text{Cl}_2$  (6.6 mL) was stirred at rt for 2 h. After purification by column chromatography (5% EtOAc/hexane) **3g** (38 mg, 50%) was obtained as a light yellow oil.

$R_f$  = 0.35 (10% EtOAc/hexane). IR (ATR)  $\nu_{\text{max}}$  = 2927, 1736, 1713  $\text{cm}^{-1}$ .  $^1\text{H}$  NMR (300 MHz,  $\text{CDCl}_3$ )  $\delta$  5.07 (s, 1H), 4.96 (s, 1H), 3.73 (s, 3H), 3.72 (s, 3H), 3.14 (t,  $J$  = 9.5 Hz, 1H), 2.88 (s, 2H), 2.60 (dd,  $J$  = 13.8, 8.8 Hz, 1H), 2.18 (tt,  $J$  = 11.0, 3.6 Hz, 1H), 2.02 (dd,  $J$  = 14.2, 9.3 Hz, 1H), 1.90-1.80 (m, 2H), 1.78-1.67 (m, 2H), 1.50 (s, 3H), 1.44 (s, 3H), 1.42-1.14 (m, 6H).  $^{13}\text{C}$  NMR (75 MHz,  $\text{CDCl}_3$ )  $\delta$  175.4 (C), 171.9 (C), 171.7 (C), 147.5 (C), 111.4 ( $\text{CH}_2$ ), 83.4 (C), 77.2 (C), 58.5 (C), 52.8 ( $2\times\text{CH}_3$ ), 50.5 (CH), 44.3 (CH), 43.7 ( $\text{CH}_2$ ), 35.7 ( $\text{CH}_2$ ), 29.0 ( $2\times\text{CH}_2$ ), 25.8 ( $\text{CH}_2$ ), 25.5 ( $\text{CH}_2$ ), 23.6 ( $\text{CH}_3$ ), 23.1 ( $\text{CH}_3$ ). HRMS (ESI)  $m/z$  calcd for  $\text{C}_{20}\text{H}_{30}\text{O}_6\text{Na}$   $[\text{M}+\text{Na}]^+$  389.1940; found 389.1932.

**Dimethyl 3-(2-(benzoyloxy)propan-2-yl)-4-methylenecyclopentane-1,1-dicarboxylate (3h).**

Following the general procedure, the reaction of 1,6-enyne **1** (50 mg, 0.21 mmol) and benzoic acid (128 mg, 1.05 mmol) with  $\text{InI}_3$  (5.2 mg, 0.01 mmol) in  $\text{CH}_2\text{Cl}_2$  (6.6 mL) was stirred at rt for 10 h. After purification by column chromatography (5% EtOAc/hexane) **3h** (40 mg, 53%) was obtained as a light yellow oil.

$R_f$  = 0.27 (5% EtOAc/hexane). IR (ATR)  $\nu_{\text{max}}$  = 2923, 1733  $\text{cm}^{-1}$ .  $^1\text{H}$  NMR (300 MHz,  $\text{CDCl}_3$ )  $\delta$  8.00-7.95 (m, 2H), 7.53 (tt,  $J$  = 7.3, 1.7 Hz, 1H), 7.43 (t,  $J$  = 7.4 Hz, 2H), 5.11 (s, 1H), 5.04 (s, 1H), 3.74 (s, 3H), 3.73 (s, 3H), 3.37 (t,  $J$  = 9.2 Hz, 1H), 2.95 (s, 2H), 2.71 (dd,  $J$  = 13.9, 8.8 Hz, 1H), 2.11 (dd,  $J$  = 13.5, 9.7 Hz, 1H), 1.65 (s, 3H), 1.61 (s, 3H).  $^{13}\text{C}$  NMR (75 MHz,  $\text{CDCl}_3$ )  $\delta$  171.8 (C), 171.7 (C), 165.6 (C), 147.3 (C), 132.6 (CH), 131.7 (C), 129.5 ( $2\times\text{CH}$ ), 128.3 ( $2\times\text{CH}$ ), 111.6 ( $\text{CH}_2$ ), 84.9 (C), 58.5 (C), 52.9 ( $\text{CH}_3$ ), 52.8 ( $\text{CH}_3$ ), 50.4 (CH), 43.8 ( $\text{CH}_2$ ), 36.0 ( $\text{CH}_2$ ), 23.7 ( $\text{CH}_3$ ), 23.2 ( $\text{CH}_3$ ). HRMS (ESI)  $m/z$  calcd for  $\text{C}_{20}\text{H}_{24}\text{O}_6\text{Na}$   $[\text{M}+\text{Na}]^+$  383.1471; found 383.1461.

**Dimethyl 3-(2-((3-methylbut-2-enoyl)oxy)propan-2-yl)-4-methylenecyclopentane-1,1-dicarboxylate (3i).**

Following the general procedure, the reaction of 1,6-enyne **1** (50 mg, 0.21 mmol) and 3-methylbut-2-enoic acid (105 mg, 1.05 mmol) with  $\text{InI}_3$  (5.2 mg, 0.01 mmol) in  $\text{CH}_2\text{Cl}_2$  (6.6 mL) was stirred at rt for 2h. After purification by column chromatography (5-20% EtOAc/hexane) **3i** (32 mg, 45%) was obtained as a light yellow oil.

$R_f$  = 0.37 (20% EtOAc/hexane). IR (ATR)  $\nu_{\text{max}}$  = 2954, 1735, 1713  $\text{cm}^{-1}$ .  $^1\text{H}$  NMR (300 MHz,  $\text{CDCl}_3$ )  $\delta$  5.58 (t,  $J$  = 1.3 Hz, 1H), 5.07 (s, 1H), 4.97 (s, 1H), 3.73 (s, 3H), 3.72 (s, 3H), 3.22 (t,  $J$  = 9.3 Hz, 1H), 2.88 (s, 2H), 2.61 (dd,  $J$  = 13.9, 8.5 Hz, 1H), 2.12 (d,  $J$  = 1.1 Hz, 3H), 2.02 (dd,  $J$  = 13.7, 9.3 Hz, 1H), 1.85 (d,  $J$  = 1.1 Hz, 3H), 1.51 (s, 3H), 1.48 (s, 3H).  $^{13}\text{C}$  NMR (75 MHz,  $\text{CDCl}_3$ )  $\delta$  171.9 (C), 171.7 (C), 166.0 (C), 155.7 (C), 147.6 (C), 117.4 (CH), 111.2 ( $\text{CH}_2$ ), 83.1 (C), 58.5 (C), 52.8 ( $2\times\text{CH}_3$ ), 50.3 (CH), 43.7 ( $\text{CH}_2$ ), 35.8 ( $\text{CH}_2$ ), 27.4 ( $\text{CH}_3$ ), 23.9 ( $\text{CH}_3$ ), 23.2 ( $\text{CH}_3$ ), 20.0 ( $\text{CH}_3$ ). HRMS (ESI)  $m/z$  calcd for  $\text{C}_{18}\text{H}_{26}\text{O}_6\text{Na}$   $[\text{M}+\text{Na}]^+$  361.1627; found 361.1619.

**Dimethyl 3-methylene-4-(2-(2,4,6-trimethoxyphenyl)propan-2-yl)cyclopentane-1,1-dicarboxylate (3j).**

Following the general procedure, the reaction of 1,6-enyne **1** (50 mg, 0.21 mmol) and 1,3,5-trimethoxybenzene (177 mg, 1.05 mmol) with  $\text{InI}_3$  (5.2 mg, 0.01 mmol) in  $\text{CH}_2\text{Cl}_2$  (6.6 mL) was stirred at rt for 19 h. After purification by column chromatography (5-20% EtOAc/hexane) **3j** (52 mg, 61%) was obtained as a light yellow oil.



$R_f = 0.35$  (20% EtOAc/hexane). IR (ATR)  $\nu_{\max} = 2953, 1731 \text{ cm}^{-1}$ .  $^1\text{H}$  NMR (300 MHz,  $\text{CDCl}_3$ )  $\delta$  6.12 (s, 2H), 4.93 (s, 1H), 4.64 (s, 1H), 3.79 (s, 3H), 3.75 (s, 6H), 3.68 (s, 6H), 2.96-2.86 (m, 2H), 2.79 (d,  $J = 15.1 \text{ Hz}$ , 1H), 2.29 (ddd,  $J = 13.6, 8.6, 1.8 \text{ Hz}$ , 1H), 1.89 (dd,  $J = 13.4, 9.5 \text{ Hz}$ , 1H), 1.49 (s, 3H), 1.39 (s, 3H).  $^{13}\text{C}$  NMR (75 MHz,  $\text{CDCl}_3$ )  $\delta$  172.3 (C), 172.2 (C), 160.6 (2×C), 158.8 (C), 150.2 (C), 117.4 (C), 109.3 (CH<sub>2</sub>), 92.9 (2×CH<sub>3</sub>), 58.7 (C), 56.0 (2×CH<sub>3</sub>), 55.1 (CH), 52.6 (2×CH<sub>3</sub>), 48.3 (CH<sub>3</sub>), 44.5 (CH<sub>2</sub>), 42.3 (C), 36.9 (CH<sub>2</sub>), 27.5 (CH<sub>3</sub>), 25.8 (CH<sub>3</sub>). HRMS (ESI)  $m/z$  calcd for  $\text{C}_{22}\text{H}_{30}\text{O}_7\text{Na}$   $[\text{M}+\text{Na}]^+$  429.1889; found 429.1886.

**Dimethyl 3-(2-(1-methyl-1*H*-indol-2-yl)propan-2-yl)-4-methylenecyclopentane-1,1-dicarboxylate (3k).<sup>9</sup>**

Following the general procedure, the reaction of 1,6-enyne **1** (50 mg, 0.21 mmol) and *N*-methylindole (130  $\mu\text{L}$ , 1.05 mmol) with  $\text{InI}_3$  (5.2 mg, 0.01 mmol) in  $\text{CH}_2\text{Cl}_2$  (6.6 mL) was stirred at rt for 8 h. After purification by column chromatography (5% EtOAc/hexane) **3k** (71 mg, 92%) was obtained as a light yellow oil.

$R_f = 0.25$  (20% EtOAc/hexane).  $^1\text{H}$  NMR (300 MHz,  $\text{CDCl}_3$ )  $\delta$  7.84 (d,  $J = 7.4 \text{ Hz}$ , 1H), 7.32-7.26 (m, 1H), 7.22 (td,  $J = 7.7, 1.1 \text{ Hz}$ , 1H), 7.09 (td,  $J = 7.6, 1.1 \text{ Hz}$ , 1H), 6.79 (s, 1H), 4.96 (s, 1H), 4.52 (s, 1H), 3.74 (s, 3H), 3.69 (s, 6H), 3.47 (t,  $J = 8.6 \text{ Hz}$ , 1H), 2.84 (br s, 2H), 2.42 (dd,  $J = 13.8, 8.7 \text{ Hz}$ , 1H), 1.89 (dd,  $J = 13.8, 9.1 \text{ Hz}$ , 1H), 1.47 (s, 3H), 1.37 (s, 3H).  $^{13}\text{C}$  NMR (75 MHz,  $\text{CDCl}_3$ )  $\delta$  172.2 (C), 172.0 (C), 149.0 (C), 137.8 (C), 126.1 (C), 126.0 (CH), 123.0 (C), 121.3 (CH), 121.2 (CH), 118.5 (CH), 110.5 (CH<sub>2</sub>), 109.3 (CH), 58.7 (C), 52.1 (CH<sub>3</sub>), 52.61 (CH<sub>3</sub>), 49.7 (CH), 44.2 (CH<sub>2</sub>), 37.9 (C), 36.6 (CH<sub>2</sub>), 32.6 (CH<sub>3</sub>), 26.0 (CH<sub>3</sub>), 24.7 (CH<sub>3</sub>).

**Dimethyl 3-(2-azidopropan-2-yl)-4-methylenecyclopentane-1,1-dicarboxylate (3l).**

Following the general procedure, the reaction of 1,6-enyne **1** (50 mg, 0.21 mmol) and trimethylsilyl azide (140  $\mu\text{L}$ , 1.05 mmol) with  $\text{InI}_3$  (10.4 mg, 0.02 mmol) in  $\text{CH}_2\text{Cl}_2$  (6.6 mL) was heated at 50 °C for 12 h. After purification by column chromatography (5-10% EtOAc/hexane) **3l** (30 mg, 60%) was obtained as a light yellow oil.

$R_f = 0.34$  (10% EtOAc/hexane). IR (ATR)  $\nu_{\max} = 2922, 2099, 1733 \text{ cm}^{-1}$ .  $^1\text{H}$  NMR (300 MHz,  $\text{CDCl}_3$ )  $\delta$  5.12 (s, 1H), 5.04 (s, 1H), 3.74 (s, 3H), 3.72 (s, 3H), 2.95-2.80 (m, 2H), 2.73-2.58 (m, 2H), 1.98 (dd,  $J = 11.5, 7.3 \text{ Hz}$ , 1H), 1.33 (s, 3H), 1.28 (s, 3H).  $^{13}\text{C}$  NMR (75 MHz,  $\text{CDCl}_3$ )  $\delta$  171.7 (C), 171.6 (C), 147.0 (C), 112.1 (CH<sub>2</sub>), 63.6 (C), 58.6 (C), 52.8 (2×CH<sub>3</sub>), 50.5 (CH), 43.3 (CH<sub>2</sub>), 36.0 (CH<sub>2</sub>), 24.4 (CH<sub>3</sub>), 23.4 (CH<sub>3</sub>). HRMS (ESI)  $m/z$  calcd for  $\text{C}_{13}\text{H}_{19}\text{N}_3\text{O}_4\text{Na}$   $[\text{M}+\text{Na}]^+$  304.1273; found 304.1268.

**3-(2-Methoxypropan-2-yl)-4-methylene-1-tosylpyrrolidine (3m).<sup>10</sup>**

Following the general procedure, the reaction of 1,6-enyne **2** (50 mg, 0.18 mmol) and methanol (36  $\mu\text{L}$ , 0.90 mmol) with  $\text{InI}_3$  (4.5 mg, 0.009 mmol) in  $\text{CH}_2\text{Cl}_2$  (5 mL) was heated at 40 °C for 24 h. After purification by column chromatography (7-10% EtOAc/hexane) **3m** (42.1 mg, 76%) was obtained as a colorless oil.

$R_f = 0.24$  (20% EtOAc/hexane).  $^1\text{H}$  NMR (300 MHz,  $\text{CDCl}_3$ )  $\delta$  7.70 (d,  $J = 8.3 \text{ Hz}$ , 2H), 7.31 (d,  $J = 7.9 \text{ Hz}$ , 2H), 5.02 (br q,  $J = 4, 2 \text{ Hz}$ , 2H), 3.78-3.76 (m, 2H), 3.39 (dd,  $J = 10.1, 4.5 \text{ Hz}$ , 1H), 3.27 (dd,  $J = 10.1, 8.0 \text{ Hz}$ , 1H), 3.08 (s, 3H), 2.81-2.76 (m, 1H), 2.41 (s, 3H), 1.11 (s, 3H), 0.99 (s, 3H).  $^{13}\text{C}$  NMR (75 MHz,  $\text{CDCl}_3$ )  $\delta$  144.8 (C), 143.7 (C), 132.9 (C), 129.8 (2×CH), 128.0 (2×CH), 110.7 (CH<sub>2</sub>), 76.3 (C), 53.5 (CH<sub>2</sub>), 51.0 (CH<sub>3</sub>), 49.8 (CH<sub>2</sub>), 49.2 (CH<sub>3</sub>), 22.4 (CH<sub>3</sub>), 21.9 (CH<sub>3</sub>), 21.7 (CH).

### 3-(2-(Benzyloxy)propan-2-yl)-4-methylene-1-tosylpyrrolidine (3n).

Following the general procedure, the reaction of 1,6-enyne **2** (50 mg, 0.180 mmol) and benzyl alcohol (93  $\mu$ L, 0.901 mmol) with  $\text{InI}_3$  (4.5 mg, 0.009 mmol) in  $\text{CH}_2\text{Cl}_2$  (5 mL) was heated at 40  $^\circ\text{C}$  for 20 h. After purification by column chromatography (5-7% EtOAc/hexane) **3n** (30.2 mg, 69%) was obtained as a yellow oil.

$R_f$  = 0.31 (20% EtOAc/hexane). IR (ATR)  $\nu_{\text{max}}$  = 3063, 2974, 2863, 1650, 1365, 1150  $\text{cm}^{-1}$ .  $^1\text{H}$  NMR (300 MHz,  $\text{CDCl}_3$ )  $\delta$  7.64 (d,  $J$  = 6.4 Hz, 2H), 7.24-7.17 (m, 7H), 5.01 (d,  $J$  = 12.5 Hz, 2H), 4.30 (q,  $J$  = 14.0 Hz, 2H), 3.73 (br s, 2H), 3.45 (dd,  $J$  = 10.1, 4.4 Hz, 1H), 3.26 (dd,  $J$  = 10.1, 8.0 Hz, 1H), 2.34 (br s, 1H), 2.34 (s, 3H), 1.17 (s, 3H), 1.06 (s, 3H).  $^{13}\text{C}$  NMR (75 MHz,  $\text{CDCl}_3$ )  $\delta$  144.5 (C), 143.6 (C), 139.2 (C), 132.7 (C), 129.7 (2 $\times$ CH), 128.3 (2 $\times$ CH), 127.9 (2 $\times$ CH), 127.3 (CH), 127.2 (2 $\times$ CH), 111.0 ( $\text{CH}_2$ ), 76.8 (C), 63.7 ( $\text{CH}_2$ ), 53.4 ( $\text{CH}_2$ ), 51.7 (CH), 49.8 ( $\text{CH}_2$ ), 22.9 ( $\text{CH}_3$ ), 22.3 ( $\text{CH}_3$ ), 21.6 ( $\text{CH}_3$ ). HRMS (ESI)  $m/z$  calcd for  $\text{C}_{22}\text{H}_{27}\text{NO}_5\text{SNa}$  [ $\text{M}+\text{Na}$ ] $^+$  408.1609; found 408.1621.

### 2-(4-Methylene-1-tosylpyrrolidin-3-yl)propan-2-yl benzoate (3o).

Following the general procedure, the reaction of 1,6-enyne **2** (100 mg, 0.36 mmol) and benzoic acid (220 mg, 1.80 mmol) with  $\text{InI}_3$  (8.9 mg, 0.018 mmol) in  $\text{CH}_2\text{Cl}_2$  (10 mL) was heated at 40  $^\circ\text{C}$  for 20 h. After purification by column chromatography (5-8% EtOAc/hexane) **3o** (61.5 mg, 43%) was obtained as a colourless oil.

$R_f$  = 0.31 (20% EtOAc/hexane). IR (ATR)  $\nu_{\text{max}}$  = 2922, 2863, 1821, 1717  $\text{cm}^{-1}$ .  $^1\text{H}$  NMR (300 MHz,  $\text{CDCl}_3$ )  $\delta$  7.94 (d,  $J$  = 7.0 Hz, 2H), 7.70 (d,  $J$  = 8.3 Hz, 2H), 7.55 (t,  $J$  = 7.4 Hz, 1H), 7.42 (t,  $J$  = 7.5 Hz, 2H), 7.32 (d,  $J$  = 7.9 Hz, 2H), 5.09-5.06 (m, 2H), 3.94 (d,  $J$  = 13.8 Hz, 1H), 3.76 (d,  $J$  = 13.8 Hz, 1H), 3.57-3.49 (m, 2H), 3.29 (dd,  $J$  = 9.6, 7.5 Hz, 1H), 2.42 (s, 3H), 1.61 (s, 3H), 1.53 (s, 3H).  $^{13}\text{C}$  NMR (75 MHz,  $\text{CDCl}_3$ )  $\delta$  165.6 (C), 143.8 (C), 143.7 (C), 132.8 (CH), 132.5 (C), 131.3 (C), 129.7 (2 $\times$ CH), 129.4 (2 $\times$ CH), 128.4 (2 $\times$ CH), 127.8 (2 $\times$ CH), 111.7 ( $\text{CH}_2$ ), 84.0 (C), 53.1 ( $\text{CH}_2$ ), 50.7 ( $\text{CH}_3$ ), 49.8 ( $\text{CH}_2$ ), 23.9 (CH), 23.6 ( $\text{CH}_3$ ), 21.6 ( $\text{CH}_3$ ). HRMS (ESI)  $m/z$  calcd for  $\text{C}_{22}\text{H}_{25}\text{NO}_4\text{SNa}$  [ $\text{M}+\text{Na}$ ] $^+$  422.1402; found 422.1411.

### 3-Methylene-1-tosyl-4-(2-(2,4,6-trimethoxyphenyl)propan-2-yl)pyrrolidine (3p).

Following the general procedure, the reaction of 1,6-enyne **2** (75 mg, 0.27 mmol) and 1,3,5-trimethoxybenzene (227 mg, 1.35 mmol) with  $\text{InI}_3$  (6.7 mg, 0.014 mmol) in  $\text{CH}_2\text{Cl}_2$  (8 mL) was heated at 40  $^\circ\text{C}$  for 20 h. After purification by column chromatography (7-10% EtOAc/hexane) **3p** (71.2 mg, 59%) was obtained as a colorless oil.

$R_f$  = 0.19 (20% EtOAc/hexane). IR (ATR)  $\nu_{\text{max}}$  = 3060, 2975, 2865, 1656, 1370  $\text{cm}^{-1}$ .  $^1\text{H}$  NMR (300 MHz,  $\text{CDCl}_3$ )  $\delta$  7.66 (d,  $J$  = 8.3 Hz, 2H), 7.30 (d,  $J$  = 7.7 Hz, 2H), 6.11 (s, 2H), 4.92 (d,  $J$  = 2.0 Hz, 1H), 4.72 (d,  $J$  = 2.0 Hz, 1H), 3.79 (s, 3H), 3.72-3.70 (m, 3H), 3.70 (s, 6H), 3.15 (d,  $J$  = 7.0 Hz, 2H), 2.42 (s, 3H), 1.41 (s, 3H), 1.28 (s, 3H).  $^{13}\text{C}$  NMR (75 MHz,  $\text{CDCl}_3$ )  $\delta$  160.5 (2 $\times$ C), 159.1 (C), 146.4 (C), 143.2 (C), 133.0 (C), 129.5 (2 $\times$ CH), 127.9 (2 $\times$ CH), 116.1 (C), 109.4 ( $\text{CH}_2$ ), 92.7 (2 $\times$ CH), 55.8 (2 $\times$ CH $_3$ ), 55.1 ( $\text{CH}_3$ ), 54.4 ( $\text{CH}_2$ ), 51.5 ( $\text{CH}_2$ ), 49.3 ( $\text{CH}_3$ ), 42.5 (C), 27.3 (CH), 26.3 ( $\text{CH}_3$ ), 21.5 ( $\text{CH}_3$ ). HRMS (ESI)  $m/z$  calcd for  $\text{C}_{24}\text{H}_{31}\text{NO}_5\text{SNa}$  [ $\text{M}+\text{Na}$ ] $^+$  468.1821; found 468.1815.

### 1-Methyl-3-(2-(4-methylene-1-tosylpyrrolidin-3-yl)propan-2-yl)-1H-indole (3q).

Following the general procedure, the reaction of 1,6-enyne **2** (50 mg, 0.180 mmol) and *N*-methyl indol (113  $\mu$ L, 0.901 mmol) with  $\text{InI}_3$  (4.5 mg, 0.009 mmol) in  $\text{CH}_2\text{Cl}_2$  (5 mL) was heated at 40  $^\circ\text{C}$  for 20 h. After purification by column chromatography (5-7% EtOAc/hexane) **3q** (41.8 mg, 57%) was obtained as a yellow oil.

$R_f = 0.31$  (20% EtOAc/hexane). IR (ATR)  $\nu_{\max} = 3050, 2970, 2862, 1650 \text{ cm}^{-1}$ .  $^1\text{H}$  NMR (300 MHz,  $\text{CDCl}_3$ )  $\delta$  7.63-7.59 (m, 2H), 7.29-7.22 (m, 5H), 7.08-7.03 (m, 1H), 6.80 (s, 1H), 4.98 (br s, 1H), 4.78 (br s, 1H), 3.96-3.89 (m, 1H), 3.71 (s, 3H), 3.70-3.67 (m, 1H), 3.39-3.36 (m, 1H), 3.26 (dd,  $J = 10.1, 3.2 \text{ Hz}$ , 1H), 2.95 (dd,  $J = 10.2, 7.9 \text{ Hz}$ , 1H), 2.42 (s, 3H), 1.31 (s, 3H), 1.26 (s, 3H).  $^{13}\text{C}$  NMR (75 MHz,  $\text{CDCl}_3$ )  $\delta$  145.3 (C), 143.5 (C), 137.9 (C), 132.7 (C), 129.6 (2 $\times$ CH), 127.8 (2 $\times$ CH), 126.4 (CH), 125.6 (C), 122.1 (C), 121.3 (CH), 120.9 (CH), 118.5 (CH), 110.6 ( $\text{CH}_2$ ), 109.6 (CH), 53.7 ( $\text{CH}_2$ ), 51.10 ( $\text{CH}_3$ ), 51.05 ( $\text{CH}_2$ ), 38.1 (C), 32.7 (CH), 26.4 ( $\text{CH}_3$ ), 24.2 ( $\text{CH}_3$ ), 21.6 ( $\text{CH}_3$ ). HRMS (ESI)  $m/z$  calcd for  $\text{C}_{24}\text{H}_{28}\text{N}_2\text{O}_2\text{SNa}$   $[\text{M}+\text{Na}]^+$  431.1769; found 431.1771.

**Dimethyl (*R*<sup>\*</sup>)-3-((*S*<sup>\*</sup>)-benzyloxy)(phenyl)methyl)-4-methylenecyclopentane-1,1-dicarboxylate (5a).**

Following the general procedure, the reaction of 1,6-enyne (*E*)-**4** (83 mg, 0.29 mmol) and benzyl alcohol (0.150 mL, 1.453 mmol) with  $\text{InI}_3$  (7.2 mg, 0.017 mmol) in  $\text{CH}_2\text{Cl}_2$  (9 mL) was heated at 40 °C for 20 h. After purification by column chromatography (10% EtOAc/hexane) **5a** (82 mg, 75%) was obtained as a colourless oil. Following the general procedure, the reaction of 1,6-enyne (*Z*)-**4** (50 mg, 0.175 mmol) and benzyl alcohol (0.091 mL, 0.875 mmol) with  $\text{InI}_3$  (4.4 mg, 0.0088 mmol) in DCE (5 mL) was heated at 60 °C for 20 h. After purification by column chromatography (10% EtOAc/hexane) **5a** (43 mg, 63%) was obtained as a colourless oil.

$R_f = 0.10$  (10% EtOAc/hexane). IR (ATR)  $\nu_{\max} = 2951, 1730, 1494, 1452 \text{ cm}^{-1}$ .  $^1\text{H}$ -NMR (300 MHz,  $\text{CDCl}_3$ ):  $\delta$  7.31-7.17 (m, 10H), 4.83 (br s, 1H), 4.38 (d,  $J = 11.8 \text{ Hz}$ , 1H), 4.36 (s, 1H), 4.31 (d,  $J = 5.9 \text{ Hz}$ , 1H), 4.17 (d,  $J = 11.8 \text{ Hz}$ , 1H), 3.63 (s, 3H), 3.60 (s, 3H), 2.94-2.69 (m, 3H), 2.46-2.29 (m, 2H).  $^{13}\text{C}$ -NMR (75 MHz,  $\text{CDCl}_3$ ):  $\delta$  172.2 (C), 172.1 (C), 148.23 (C), 140.70 (C), 138.43 (C), 128.3 (2 $\times$ CH), 128.2 (2 $\times$ CH), 127.73 (CH), 127.70 (2 $\times$ CH), 127.47 (CH), 127.44 (2 $\times$ CH), 108.8 ( $\text{CH}_2$ ), 83.35 (CH), 70.8 ( $\text{CH}_2$ ), 58.7 (C), 52.75 ( $\text{CH}_3$ ), 52.73 ( $\text{CH}_3$ ), 49.4 (CH), 42.2 ( $\text{CH}_2$ ), 35.52 ( $\text{CH}_2$ ). HRMS (ESI)  $m/z$  calcd for  $\text{C}_{24}\text{H}_{26}\text{O}_5\text{Na}$   $[\text{M}+\text{Na}]^+$  417.1677; found 417.1665.

**Dimethyl (*R*<sup>\*</sup>)-3-((*S*<sup>\*</sup>)-benzoyloxy)(phenyl)methyl)-4-methylenecyclopentane-1,1-dicarboxylate (5b).**

Following the general procedure, the reaction of 1,6-enyne (*E*)-**4** (76 mg, 0.26 mmol) and benzoic acid (161 mg, 1.32 mmol) with  $\text{InI}_3$  (6.5 mg, 0.013 mmol) in  $\text{CH}_2\text{Cl}_2$  (12 mL) was heated at 40 °C for 20 h. After purification by column chromatography (10% EtOAc/hexane) **5b** (67 mg, 62%) was obtained as a colourless oil.

Following the general procedure, the reaction of 1,6-enyne (*Z*)-**4** (75 mg, 0.26 mmol) and benzoic acid (160 mg, 1.31 mmol) with  $\text{InI}_3$  (12.9 mg, 0.026 mmol, 10 mol%) in  $\text{CH}_2\text{Cl}_2$  (5 mL) was heated at 40 °C for 20 h. After purification by column chromatography (10% EtOAc/hexane) **5b** (30 mg, 25%) was obtained as a colourless oil.

$R_f = 0.10$  (10% EtOAc/hexane). IR (ATR)  $\nu_{\max} = 2952, 1721, 1432 \text{ cm}^{-1}$ .  $^1\text{H}$  NMR (300 MHz,  $\text{CDCl}_3$ ):  $\delta$  8.12 (d,  $J = 8.5 \text{ Hz}$ , 2H), 7.61-7.17 (m, 8H), 6.17 (d,  $J = 5.7 \text{ Hz}$ , 1H), 5.03 (br s, 1H), 4.75 (br s, 1H), 3.77 (s, 3H), 3.74 (s, 3H), 3.39-2.39 (m, 1H), 3.00 (s, 2H), 2.59 (dd,  $J = 7.6 \text{ Hz}$ , 1H), 2.38 (dd,  $J = 9.5 \text{ Hz}$ , 1H).  $^{13}\text{C}$  NMR (75 MHz,  $\text{CDCl}_3$ ):  $\delta$  171.9 (C), 171.8 (C), 165.5 (C), 146.8 (C), 139.2 (C), 133.1 (CH), 130.1 (CH), 129.72 (2 $\times$ CH), 129.67 (CH), 128.51 (2 $\times$ CH), 128.47 (2 $\times$ CH), 128.0 (CH), 126.6 (2 $\times$ CH), 109.8 ( $\text{CH}_2$ ), 77.2 (CH), 58.5 ( $\text{CH}_3$ ), 52.9 ( $\text{CH}_2$ ), 47.8 (CH), 42.0 ( $\text{CH}_3$ ), 35.6 ( $\text{CH}_2$ ). HRMS (ESI)  $m/z$  calcd for  $\text{C}_{24}\text{H}_{24}\text{O}_6\text{Na}$   $[\text{M}+\text{Na}]^+$  431.1470; found 431.1460.

**Dimethyl (S\*)-3-((S\*)-1-methyl-1*H*-indol-3-yl)(phenyl)methyl-4-methylenecyclopentane-1,1-dicarboxylate (5c).<sup>11</sup>**

Following the general procedure, the reaction of 1,6-enyne (*E*)-**4** (50 mg, 0.175 mmol) and *N*-methylindole (0.110 mL, 0.875 mmol) with InI<sub>3</sub> (4.3 mg, 0.009 mmol) in CH<sub>2</sub>Cl<sub>2</sub> (5 mL) was heated at 40 °C for 20 h. After purification by column chromatography (10% EtOAc/hexane) **5c** (64 mg, 88%) was obtained as a colorless oil. Following the general procedure, the reaction of 1,6-enyne (*Z*)-**4** (50 mg, 0.175 mmol) and *N*-methylindole (0.110 mL, 0.875 mmol) with InI<sub>3</sub> (4.3 mg, 0.009 mmol) in DCE (5 mL) was heated at 60 °C for 18 h. After purification by column chromatography (10% EtOAc/hexane) **5c** (45.6 mg, 62%) was obtained as a colourless oil.

R<sub>f</sub> = 0.10 (10% EtOAc/hexane). <sup>1</sup>H NMR (300 MHz, CDCl<sub>3</sub>): δ 7.53 (d, *J* = 8.2 Hz, 1H), 7.32 (d, *J* = 7.5 Hz, 2H), 7.26-7.03 (m, 6H), 7.00 (s, 1H), 4.77 (s, 1H), 4.17-4.06 (m, 2H), 3.75 (s, 3H), 3.72 (s, 3H), 3.63 (s, 3H), 3.54-3.48 (m, 1H), 3.11 (d, *J* = 16.2 Hz, 1H), 2.89-2.84 (m, 1H), 2.74 (dd, *J* = 13.6, 8.1 Hz, 1H), 1.93 (dd, *J* = 13.7, 8.6 Hz, 1H). <sup>13</sup>C NMR (75 MHz, CDCl<sub>3</sub>): δ 172.3 (C), 172.1 (C), 148.9 (C), 144.6 (C), 136.9 (C), 128.5 (2×CH), 128.1 (2×CH), 127.6 (CH), 126.2 (CH), 126.0 (CH), 121.6 (CH), 119.4 (CH), 118.9 (CH), 117.2 (CH), 110.1 (CH<sub>2</sub>), 109.1 (CH), 58.4 (C), 52.8 (CH<sub>3</sub>), 52.7 (CH<sub>3</sub>), 48.1 (CH), 46.8 (CH), 41.8 (CH<sub>2</sub>), 40.0 (CH<sub>2</sub>), 32.8 (CH<sub>3</sub>).

**Dimethyl (S\*)-3-methylene-4-((S\*)-phenyl(2,4,6-trimethoxyphenyl)methyl)cyclopentane-1,1-dicarboxylate (5d).<sup>11</sup>**

Following the general procedure, the reaction of 1,6-enyne (*E*)-**4** (50 mg, 0.178 mmol) and 1,3,5-trimethoxybenzene (147.2 mg, 0.875 mmol) with InI<sub>3</sub> (4.4 mg, 0.009 mmol) in CH<sub>2</sub>Cl<sub>2</sub> (5 mL) was heated at 40 °C for 20 h. After purification by column chromatography (10% EtOAc/hexane) **5d** (62 mg, 78%) was obtained as a colorless oil.

Following the general procedure, the reaction of 1,6-enyne (*Z*)-**4** (50 mg, 0.175 mmol) and 1,3,5-trimethoxybenzene (147.2 mg, 0.875 mmol) with InI<sub>3</sub> (4.4 mg, 0.009 mmol) in DCE (5 mL) was heated at 60 °C for 16 h. After purification by column chromatography (10% EtOAc/hexane) **5d** (60 mg, 75%) was obtained as a colourless oil.

R<sub>f</sub> = 0.10 (10% EtOAc/hexane). <sup>1</sup>H NMR (300 MHz, CDCl<sub>3</sub>): δ 7.45 (d, *J* = 7.6 Hz, 2H), 7.18 (t, *J* = 7.2 Hz, 2H), 7.09 (t, *J* = 7.3 Hz, 1H), 6.07 (s, 2H), 4.72 (br s, 1H), 4.48 (d, *J* = 11.0 Hz, 1H), 4.24 (br s, 1H), 3.81-4.03 (m, 1H), 3.81 (s, 6H), 3.76 (s, 3H), 3.74 (s, 3H), 3.66 (s, 3H), 3.03 (d, *J* = 17.4 Hz, 2H), 2.35 (dd, *J* = 7.0, 1.2 Hz, 1H), 1.64 (dd, *J* = 12.3, 10.7 Hz, 1H). <sup>13</sup>C NMR (75 MHz, CDCl<sub>3</sub>): δ 172.5 (C), 172.4 (C), 159.5 (2×C), 158.7 (C), 151.4 (C), 144.6 (C), 128.2 (2×CH), 127.7 (2×CH), 125.5 (CH), 113.6 (2×CH), 108.1 (CH<sub>2</sub>), 90.9 (CH), 57.7 (CH<sub>3</sub>), 55.6 (CH<sub>3</sub>), 55.2 (CH<sub>3</sub>), 53.5 (C), 52.7 (CH<sub>3</sub>), 52.6 (CH<sub>3</sub>), 44.2 (CH), 43.0 (CH), 41.7 (CH<sub>2</sub>), 40.0 (CH<sub>2</sub>).

**Dimethyl (R\*)-3-((S\*)-azido(phenyl)methyl)-4-methylenecyclopentane-1,1-dicarboxylate (5e).**

Following the general procedure, the reaction of 1,6-enyne (*E*)-**4** (50 mg, 0.175 mmol) and trimethylsilyl azide (0.17 mL, 0.88 mmol) with InI<sub>3</sub> (8.7 mg, 0.018 mmol) in CH<sub>2</sub>Cl<sub>2</sub> (5 mL) was heated at 50 °C for 40 h. After purification by column chromatography (5% EtOAc/hexane) **5e** (46 mg, 80%) was obtained as a colourless oil. Following the general procedure, the reaction of 1,6-enyne (*Z*)-**4** (50 mg, 0.175 mmol) and trimethylsilyl azide (0.17 mL, 0.88 mmol) with InI<sub>3</sub> (8.7 mg, 0.018 mmol) in DCE (5 mL) was heated at 50 °C for 40 h. After

purification by column chromatography (10% EtOAc/hexane) **5e** (39 mg, 67%) was obtained as a colourless oil.

$R_f$  = 0.48 (20% EtOAc/hexane). IR (ATR)  $\nu_{\max}$  = 2991, 2098, 1731, 1452, 1434  $\text{cm}^{-1}$ .  $^1\text{H}$  NMR (300 MHz,  $\text{CDCl}_3$ )  $\delta$  7.40-7.30 (m, 5H), 5.04 (q,  $J$  = 2.2 Hz, 1H), 4.68-4.66 (m, 2H), 3.74 (s, 3H), 3.69 (s, 3H), 3.05-2.96 (m, 3H), 2.44 (dd,  $J$  = 13.4, 7.8 Hz, 1H), 2.22 (dd,  $J$  = 13.4, 9.4 Hz, 1H).  $^{13}\text{C}$  NMR (75 MHz,  $\text{CDCl}_3$ )  $\delta$  171.8 (C), 171.7 (C), 147.7 (C), 138.5 (C), 128.7 (2 $\times$ CH), 128.2 (CH), 127.1 (2 $\times$ CH), 109.7 (CH<sub>2</sub>), 68.9 (CH), 58.4 (C), 52.8 (2 $\times$ CH<sub>3</sub>), 48.0 (CH), 41.9 (CH<sub>2</sub>), 35.6 (CH<sub>2</sub>). HRMS (ESI)  $m/z$  calcd for  $\text{C}_{17}\text{H}_{19}\text{N}_3\text{O}_4\text{Na}$   $[\text{M}+\text{Na}]^+$  352.1273; found 352.1269.

#### **Dimethyl (Z)-3-(2-methoxypropan-2-yl)-4-(methylene-d)cyclopentane-1,1-dicarboxylate ((Z)-3a-d<sub>1</sub>).**

Following the general procedure, the reaction of 1,6-enyne **1-d<sub>1</sub>** (50 mg, 0.20 mmol), prepared from enyne **2** by metalation with *n*-BuLi in THF at  $-78^\circ\text{C}$  followed by addition of  $\text{D}_2\text{O}$  in 77% yield with 91% D incorporation, and MeOH (40  $\mu\text{L}$ , 1.00 mmol) with  $\text{InI}_3$  (5.0 mg, 0.01 mmol) in  $\text{CH}_2\text{Cl}_2$  (6 mL) was stirred at rt for 20 h. After purification by column chromatography (3-10% EtOAc/hexane) (Z)-**3a-d<sub>1</sub>** (35 mg, 65%, 91% D) was obtained as a colourless oil.  $R_f$  = 0.26 (10% EtOAc/hexane).  $^1\text{H}$  NMR (300 MHz,  $\text{CDCl}_3$ )  $\delta$  5.03 (br s, 1H), 3.72 (s, 3H), 3.71 (s, 3H), 3.18 (s, 3H), 2.95-2.78 (m, 3H), 2.55 (ddd,  $J$  = 13.5, 8.3, 1.7 Hz, 1H), 2.00 (dd,  $J$  = 13.7, 9.3 Hz, 1H), 1.17 (s, 3H), 1.11 (s, 3H). The  $^1\text{H}$  NMR spectra of (Z)-**3a-d<sub>1</sub>** showed deuteration (91% D) at the exocyclic alkenyl Z-hydrogen (4.97 ppm).  $R_f$  = 0.26 (10% EtOAc/hexane). IR (ATR)  $\nu_{\max}$  = 2953, 1731  $\text{cm}^{-1}$ .  $^1\text{H}$  NMR (300 MHz,  $\text{CDCl}_3$ ):  $\delta$  5.03 (br s, 1H), 3.73 (s, 3H), 3.71 (s, 3H), 3.18 (s, 3H), 2.88-2.80 (m, 3H), 2.54 (ddd,  $J$  = 13.5, 10.0, 1.7 Hz, 1H), 2.0 (dd,  $J$  = 13.5, 6.7 Hz, 1H), 1.17 (s, 3H), 1.11 (s, 3H).  $^{13}\text{C}$  NMR (75 MHz,  $\text{CDCl}_3$ )  $\delta$  172.1 (C), 172.0 (C), 148.1 (C), 110.3 (CH<sub>2</sub>), 76.7 (C), 58.6 (C), 52.8 (2 $\times$ CH<sub>3</sub>), 49.1 (CH), 49.0 (CH<sub>3</sub>), 43.4 (CH<sub>2</sub>), 36.0 (CH<sub>2</sub>), 22.6 (CH<sub>3</sub>), 22.2 (CH<sub>3</sub>). HRMS (ESI)  $m/z$  calcd for  $\text{C}_{14}\text{H}_{21}\text{DO}_5\text{Na}$   $[\text{M}+\text{Na}]^+$  294.1428; found 294.1423.

#### **Dimethyl (E)-3-(2-(methoxy-d<sub>3</sub>)propan-2-yl)-4-methylenecyclopentane-1,1-dicarboxylate ((E)-3a-d<sub>4</sub>).<sup>12</sup>**

Following the general procedure, the reaction of 1,6-enyne **1** (50 mg, 0.21 mmol) and MeOH-d<sub>4</sub> (43  $\mu\text{L}$ , 1.05 mmol) with  $\text{InI}_3$  (5.2 mg, 0.01 mmol) in  $\text{CH}_2\text{Cl}_2$  (6 mL) was stirred at rt for 20 h. After purification by column chromatography (3-5% EtOAc/hexane) (E)-**3a-d<sub>4</sub>** (42.7 mg, 74%, 75% D) was obtained as a colourless oil.  $R_f$  = 0.26 (10% EtOAc/hexane).  $^1\text{H}$  NMR (300 MHz,  $\text{CDCl}_3$ )  $\delta$  4.97 (br s, 1H), 3.72 (s, 3H), 3.71 (s, 3H), 2.95-2.78 (m, 3H), 2.55 (ddd,  $J$  = 13.5, 8.3, 1.7 Hz, 1H), 2.00 (dd,  $J$  = 13.7, 9.3 Hz, 1H), 1.17 (s, 3H), 1.11 (s, 3H). The  $^1\text{H}$  NMR spectra of (E)-**3a-d<sub>4</sub>** showed deuteration (75% D) at the exocyclic alkenyl E-hydrogen (5.03 ppm) and the signal at 3.18 (3H) was absent in the spectrum.

$^1\text{H}$  NMR (300 MHz,  $\text{CDCl}_3$ ):  $\delta$  4.97 (br s, 1H), 3.72 (s, 3H), 3.71 (s, 3H), 2.88-2.80 (m, 3H), 2.54 (ddd,  $J$  = 13.5, 8.5, 1.8 Hz, 1H), 2.0 (dd,  $J$  = 13.5, 4.1 Hz, 1H), 1.17 (s, 3H), 1.11 (s, 3H).  $^{13}\text{C}$  NMR (75 MHz,  $\text{CDCl}_3$ )  $\delta$  172.1 (C), 172.0 (C), 148.1 (C), 110.6 (CH<sub>2</sub>), 76.7 (C), 58.6 (C), 52.7 (2 $\times$ CH<sub>3</sub>), 49.1 (CH), 43.3 (CH<sub>2</sub>), 36.0 (CH<sub>2</sub>), 22.6 (CH<sub>3</sub>), 22.2 (CH<sub>3</sub>).

## 5. $^1\text{H}$ NMR data of deuterated experiments

Reaction of 1,6-enyne **1** using MeOH as nucleophile.

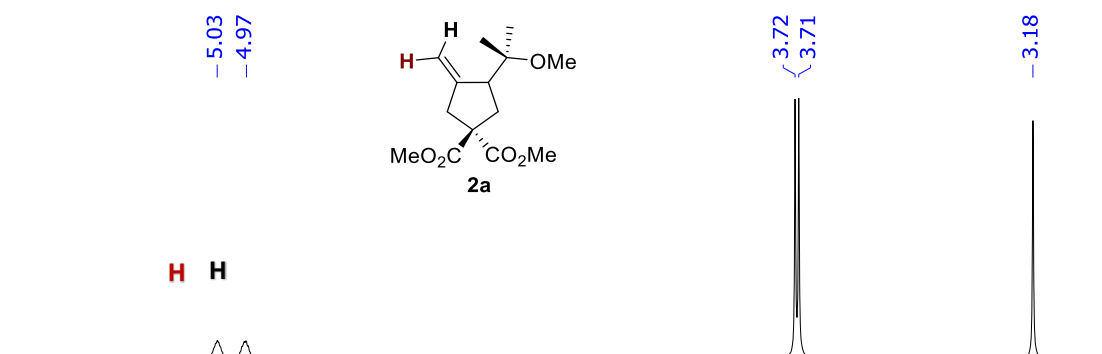

Reaction of 1,6-enyne **1-d<sub>1</sub>** (91% **D**) using MeOH as nucleophile to afford (*Z*)-**3a-d<sub>1</sub>** (91% **D**). The  $^1\text{H}$  NMR spectra of (*Z*)-**3a-d<sub>1</sub>** showed deuteration (91% **D**) at the exocyclic alkenyl *Z*-hydrogen (4.97 ppm).

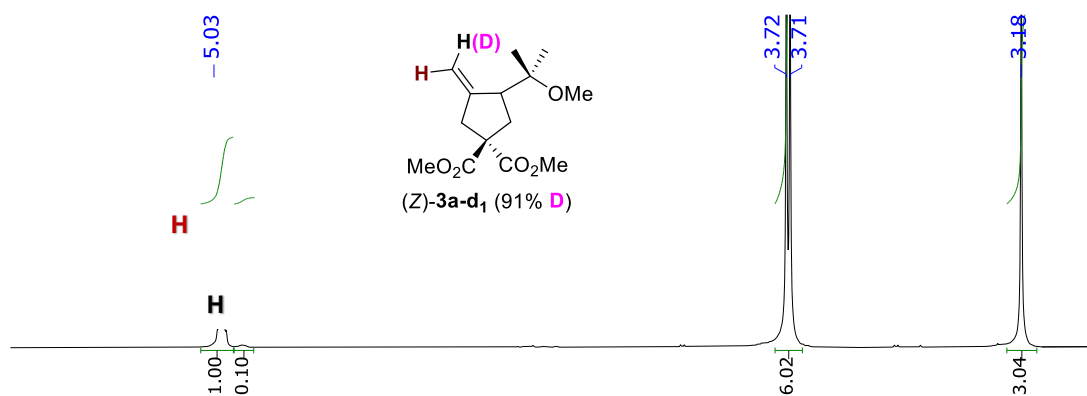

Reaction of 1,6-enyne **1** using  $\text{CD}_3\text{OD}$  as nucleophile to afford (*E*)-**3a-d<sub>4</sub>** (75% **D**). The  $^1\text{H}$  NMR spectra of (*E*)-**3a-d<sub>4</sub>** showed deuteration (75% **D**) at the exocyclic alkenyl *E*-hydrogen (5.03 ppm) and the signal at 3.18 (3H) was absent in the spectrum.

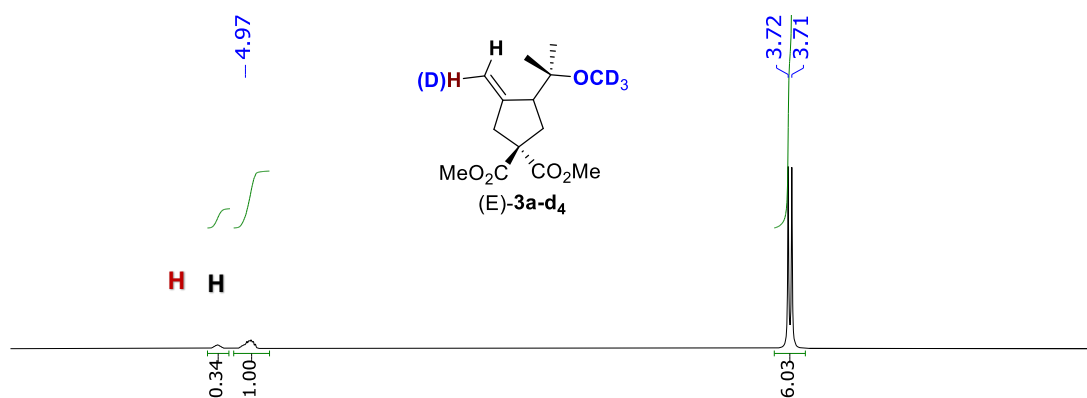

**6.  $^1\text{H}$  NMR spectra of the reaction of 1,6-enyne (Z)-4 with  $\text{InI}_3$  (5 mol%) and 1,2,3-trimethoxybenzene at different temperatures**

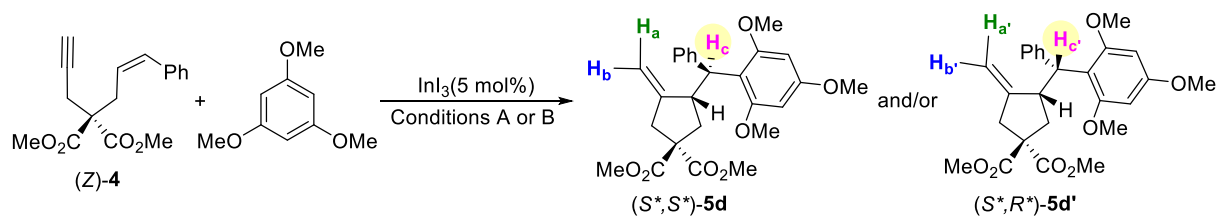

**Conditions A:** DCE (0.035 M),  $-20\text{ }^\circ\text{C}$  to  $40\text{ }^\circ\text{C}$ , 22 h.

Broadening of the spectrum in the region of 4.1 to 4.8 ppm for (S\*,S\*)-5d/(S\*,R\*)-5d' with 1:1.12 ratio

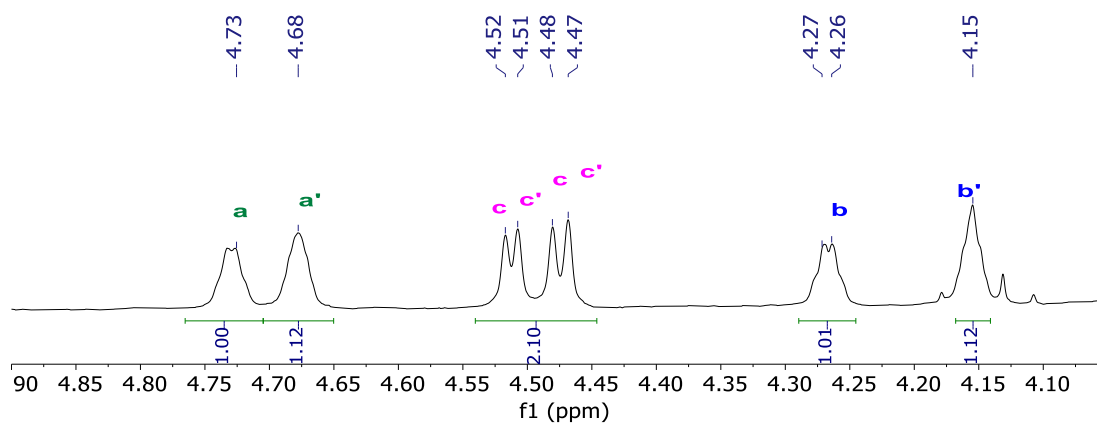

**Conditions B:** DCE (0.035 M),  $-20\text{ }^\circ\text{C}$  to  $60\text{ }^\circ\text{C}$ , 16 h.

Broadening of the spectrum in the region of 4.1 to 4.8 ppm for (S\*,S\*)-5d/(S\*,R\*)-5d' with 1:0 ratio

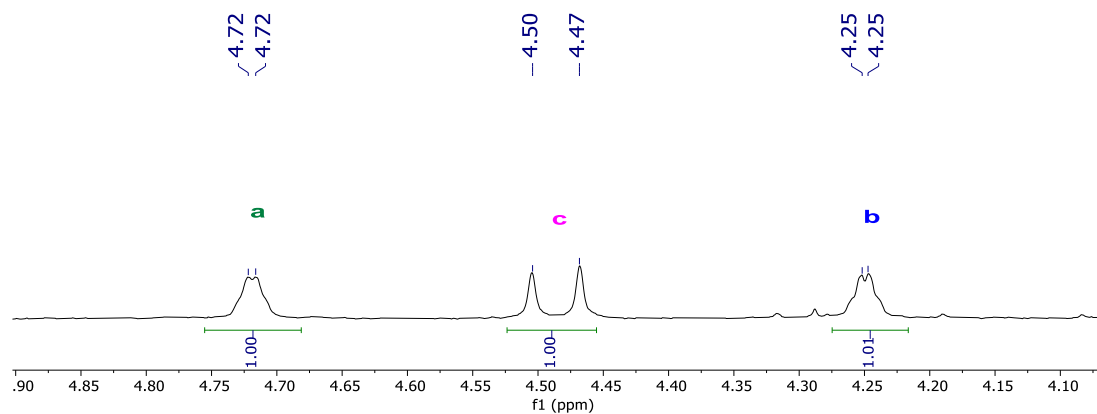

## 7. References

- <sup>1</sup> F. Schröder, C. Tugnym, E. Salanouve, H. Clavier, L. Giordano, D. Moraleda, Y. Gimbert, V. Mouriès-Mansuy, J.-P. Goddard, L. Fensterbank, Secondary Phosphine Oxide–Gold(I) Complexes and Their First Application in Catalysis, *Organometallics*, 2014, **33**, 4051–4056.
- <sup>2</sup> E. Nyfeler, P. Renaud, Decarboxylative Radical Azidation Using MPDOC and MMDOC Esters, *Org. Lett.*, 2008, **10**, 985–988.
- <sup>3</sup> T. Kataoka, H. Yoshimatsu, Y. Noda, T. Sato, H. Shimizu, M. Hori, Versatile Cyclisation Reactions Using Selenoboranes, *J. Chem. Soc. Perkin Trans. 1.*, 1987, 121–129.
- <sup>4</sup> L. Charruault, V. Michelet, R. Taras, S. Gladiali, J.-P. Genêt, Functionalized Carbo- and Heterocycles via Pt-Catalyzed Asymmetric Alkoxy- and Hydroxycyclization of 1,6-Enynes, *Chem. Commun.*, 2004, 850–851.
- <sup>5</sup> J. W. Faller, Ruthenium Catalyzed Enyne Cycloisomerizations and Hydroxycyclizations with Skeletal Rearrangement, *J. Organomet. Chem.*, 2006, **691**, 1912–1918.
- <sup>6</sup> M. Méndez, M. Paz Muñoz, A. M. Echavarren, Platinum-Catalyzed Alkoxy- and Hydroxycyclization of Enynes, *J. Am. Chem. Soc.*, 2000, **122**, 11549–11550.
- <sup>7</sup> C. Nieto-Oberhuber, M. P. Muñoz, S. Lopez, E. Jiménez-Nuñez, C. Nevado, E. Herrero-Gómez, M. Raducan, A. M. Echavarren, Gold(I)-Catalyzed Cyclizations of 1,6-Enynes: Alkoxy- and Hydroxycyclizations and *exo/endo* Skeletal Rearrangements, *Chem. Eur. J.*, 2006, **12**, 1677–1693.
- <sup>8</sup> C. Tugny, N. Rio, M. Koohgard, N. Vanthuyne, D. Lesage, K. Bijouard, P. Zhang, J. Meijide Suárez, S. Roland, E. Derat, O. Bistri-Aslanoff, M. Sollogoub, L. Fensterbank, V. Mouriès-Mansuy,  $\beta$ -Cyclodextrin–NHC–Gold(I) Complex ( $\beta$ -ICyD)AuCl: A Chiral Nanoreactor for Enantioselective and Substrate-Selective Alkoxy- and Hydroxycyclization Reactions., *Adv. Synth. Catal.*, 2020, **10**, 5964–5972.
- <sup>9</sup> C. H. M. Amijs, C. Ferrer, A. M. Echavarren, Gold(I)-Catalysed Arylation of 1,6-Enynes: Different Site Reactivity of Cyclopropyl Gold Carbenes, *Chem. Commun.*, 2007, 698–700.
- <sup>10</sup> C. Nevado, L. Charruault, V. Michelet, C. Nieto-Oberhuber, M. P. Muñoz, M. Méndez, M.-N. Rager, J.-P. Genêt, A. M. Echavarren, On the Mechanism of Carbohydroxypalladation of Enynes. Additional Insights on the Cyclization of Enynes with Electrophilic Metal Complexes, *Eur. J. Org. Chem.*, 2003, 706–713.
- <sup>11</sup> P. Y. Toullec, E. Genin, L. Leseurre, J.-P. Genêt, V. Michelet, Room-Temperature Au<sup>I</sup>-Catalyzed C–C Bond Formation through a Tandem Friedel–Crafts-Type Addition/Carbocyclization Reaction, *Angew. Chem., Int. Ed.*, 2006, **45**, 7427–7430.
- <sup>12</sup> M. Méndez, M. P. Muñoz, C. Nevado, D. C. Cárdenas, A. M. Echavarren, Cyclizations of Enynes Catalyzed by PtCl<sub>2</sub> or Other Transition Metal Chlorides: Divergent Reaction Pathways, *J. Am. Chem. Soc.*, 2001, **123**, 10511–10520.



## 8. $^1\text{H}$ NMR and $^{13}\text{C}$ NMR spectra for products

$^1\text{H}$  NMR (400 MHz,  $\text{CDCl}_3$ , 300 K) spectrum of **1**

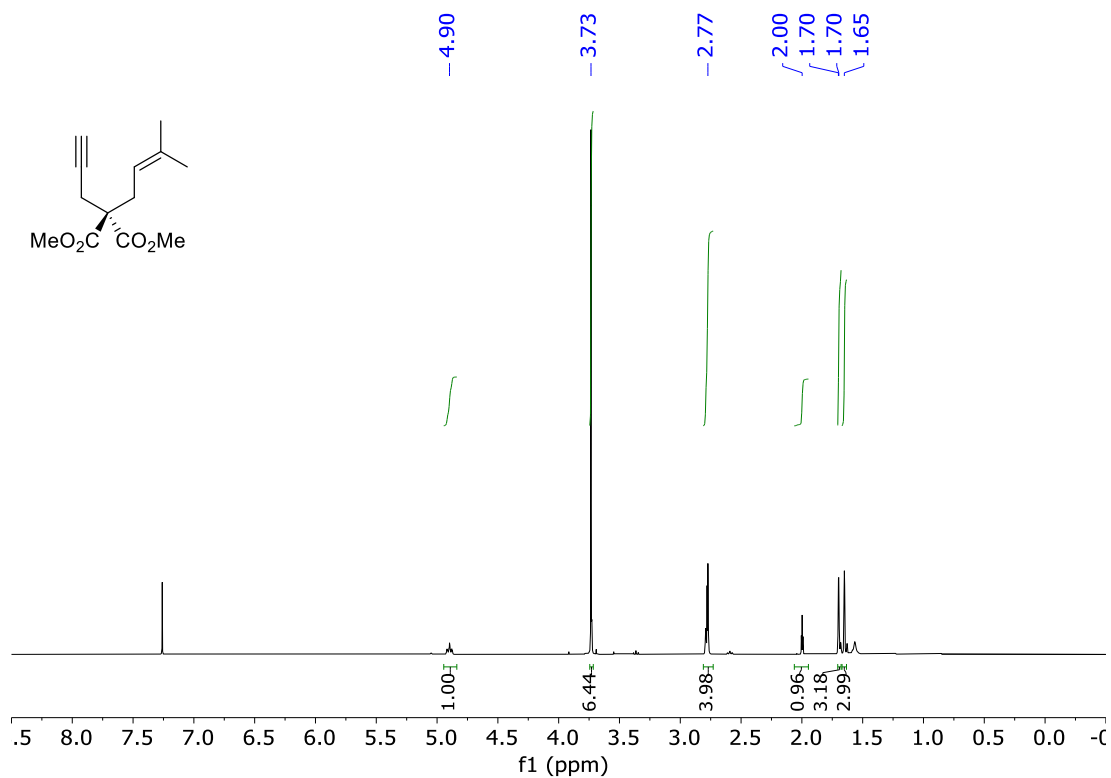

$^{13}\text{C}$  NMR (100 MHz,  $\text{CDCl}_3$ , 300 K) spectrum of **1**

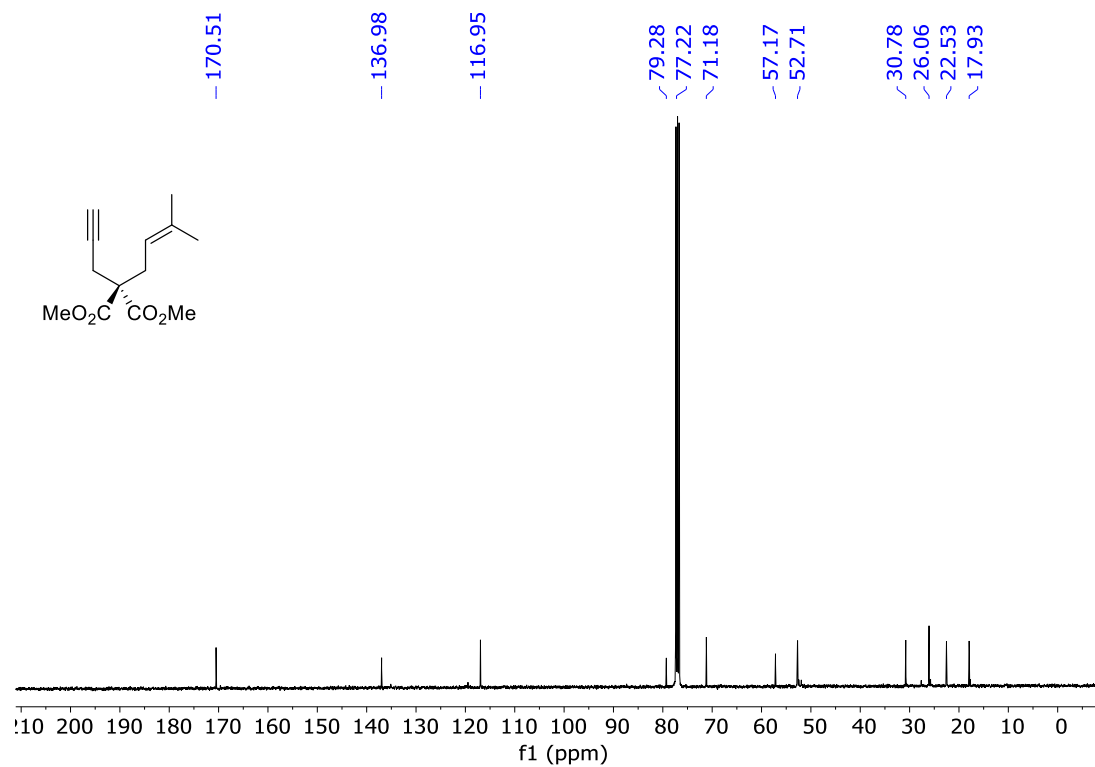

$^1\text{H}$  NMR (300 MHz,  $\text{CDCl}_3$ , 300 K) spectrum of **2**

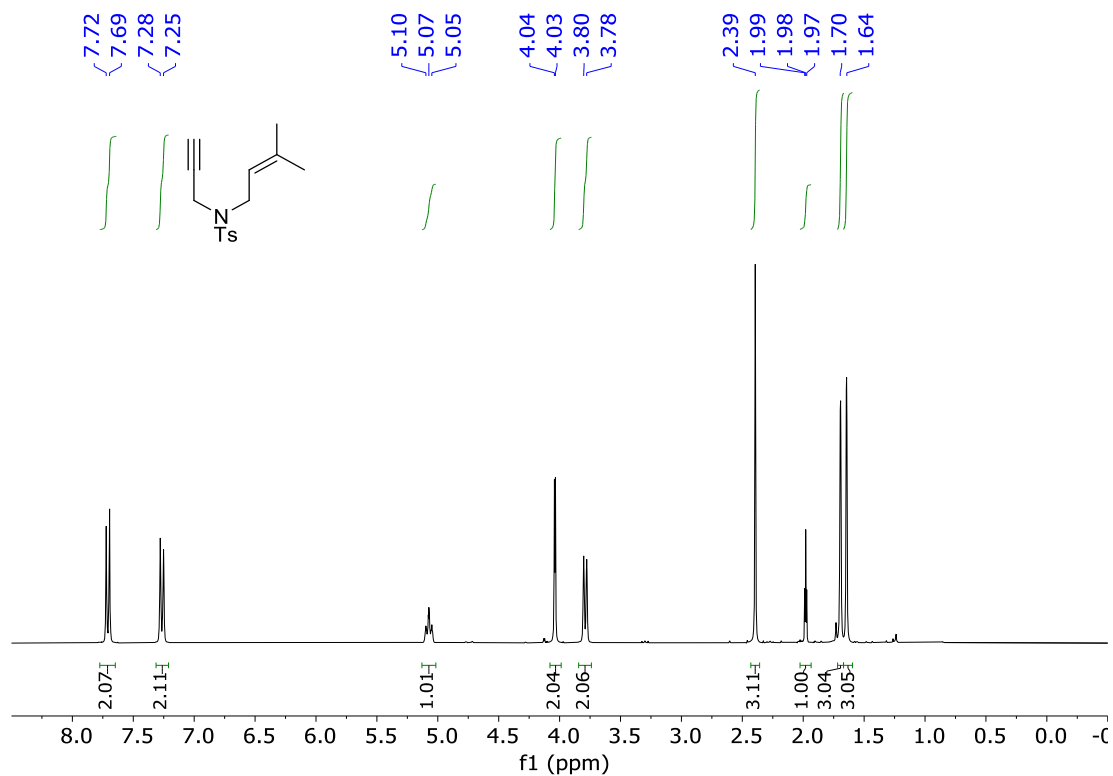

$^{13}\text{C}$  NMR (75 MHz,  $\text{CDCl}_3$ , 300 K) spectrum of **2**

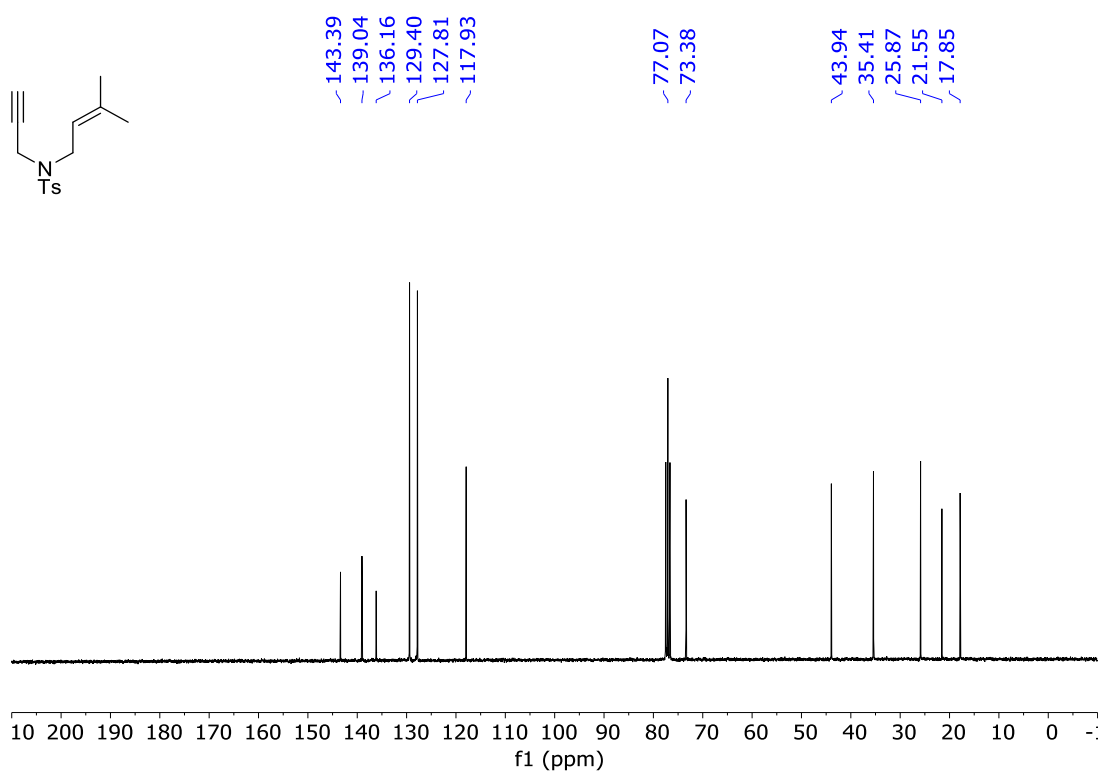

$^1\text{H}$  NMR (300 MHz,  $\text{CDCl}_3$ , 300 K) spectrum of (*E*)-4

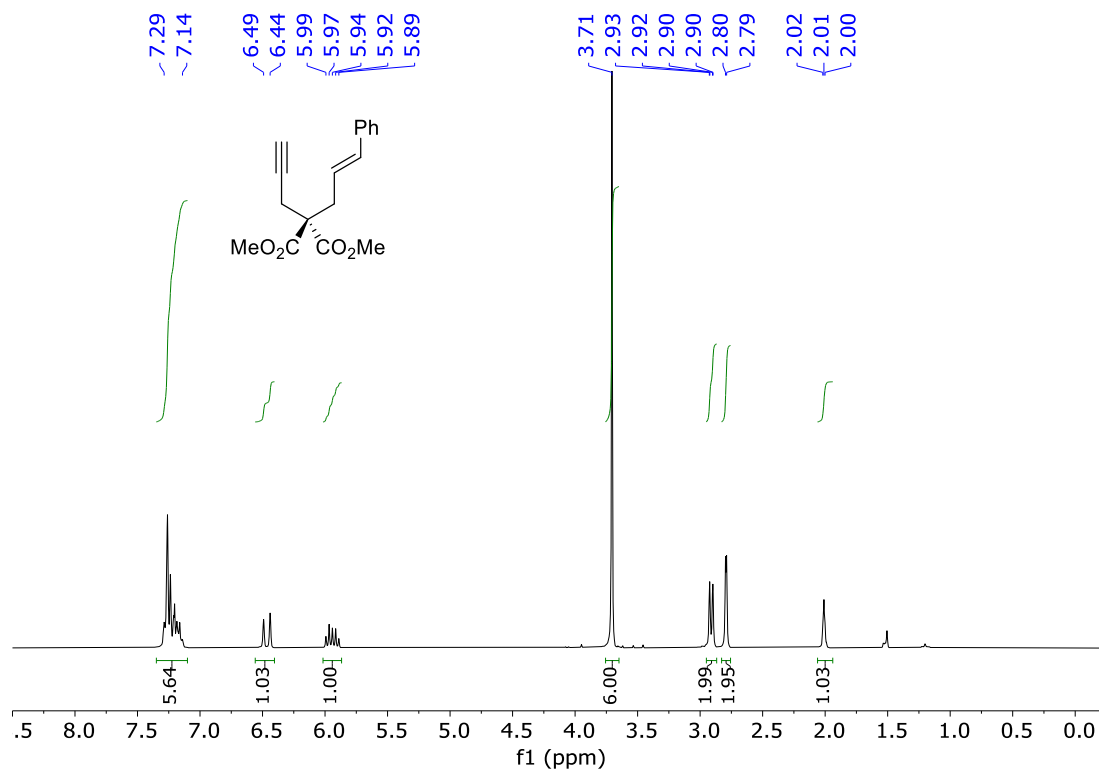

$^{13}\text{C}$  NMR (75 MHz,  $\text{CDCl}_3$ , 300 K) spectrum of (*E*)-4

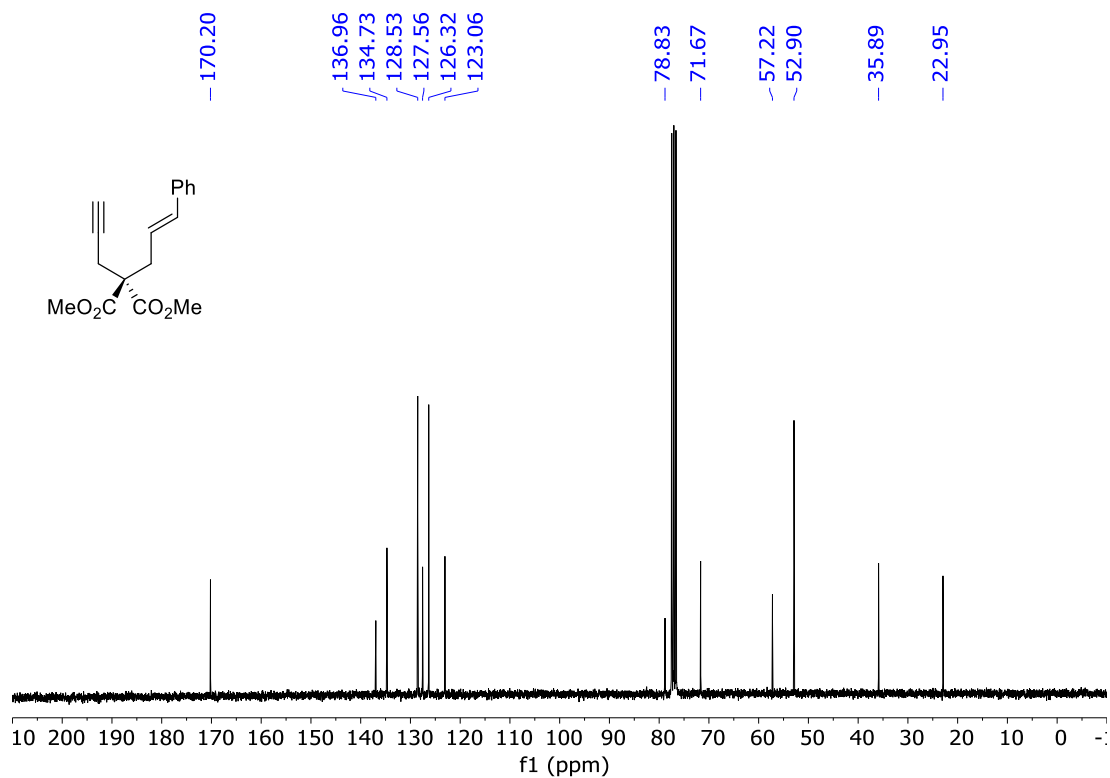

$^1\text{H}$  NMR (300 MHz,  $\text{CDCl}_3$ , 300 K) spectrum of (Z)-4

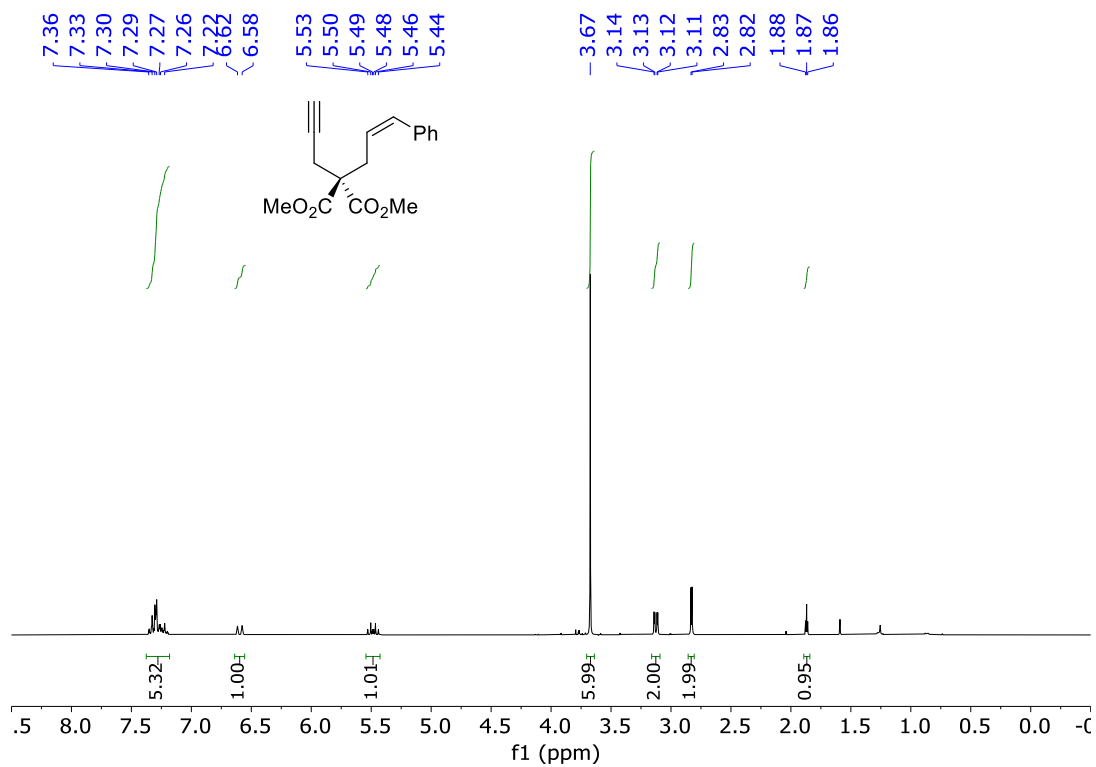

$^{13}\text{C}$  NMR (75 MHz,  $\text{CDCl}_3$ , 300 K) spectrum of (Z)-4

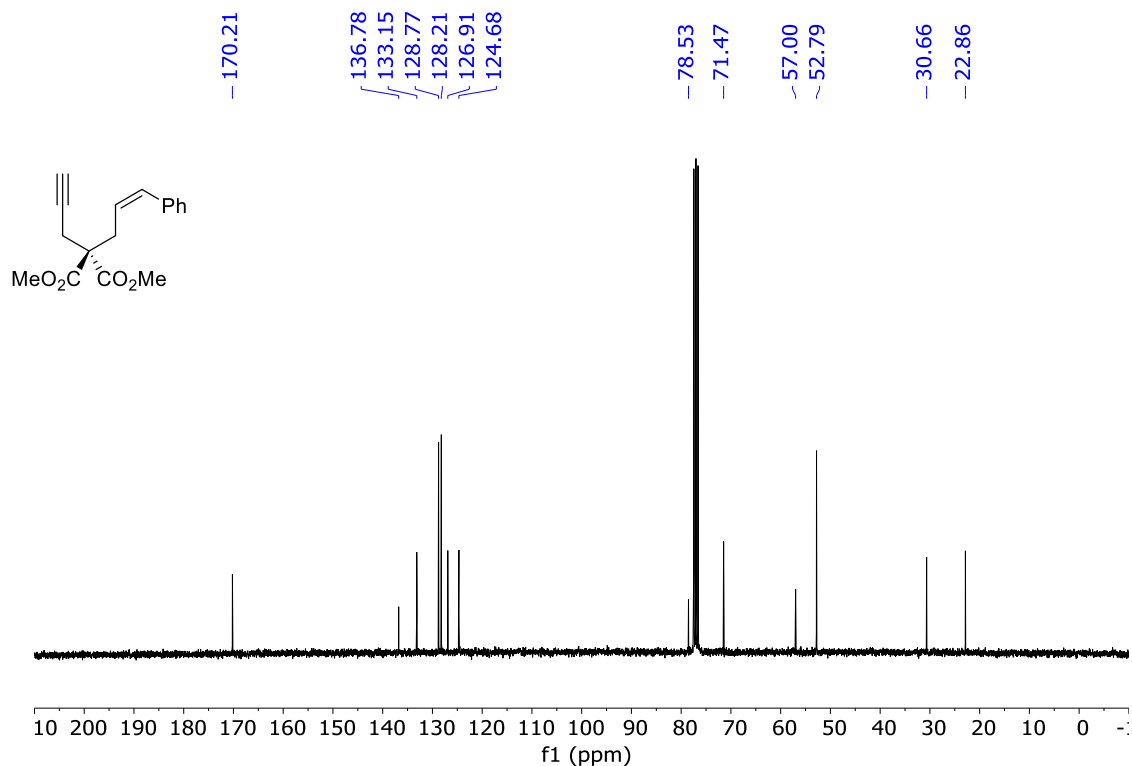

$^1\text{H}$  NMR (400 MHz,  $\text{CDCl}_3$ , 300 K) spectrum of **1a**

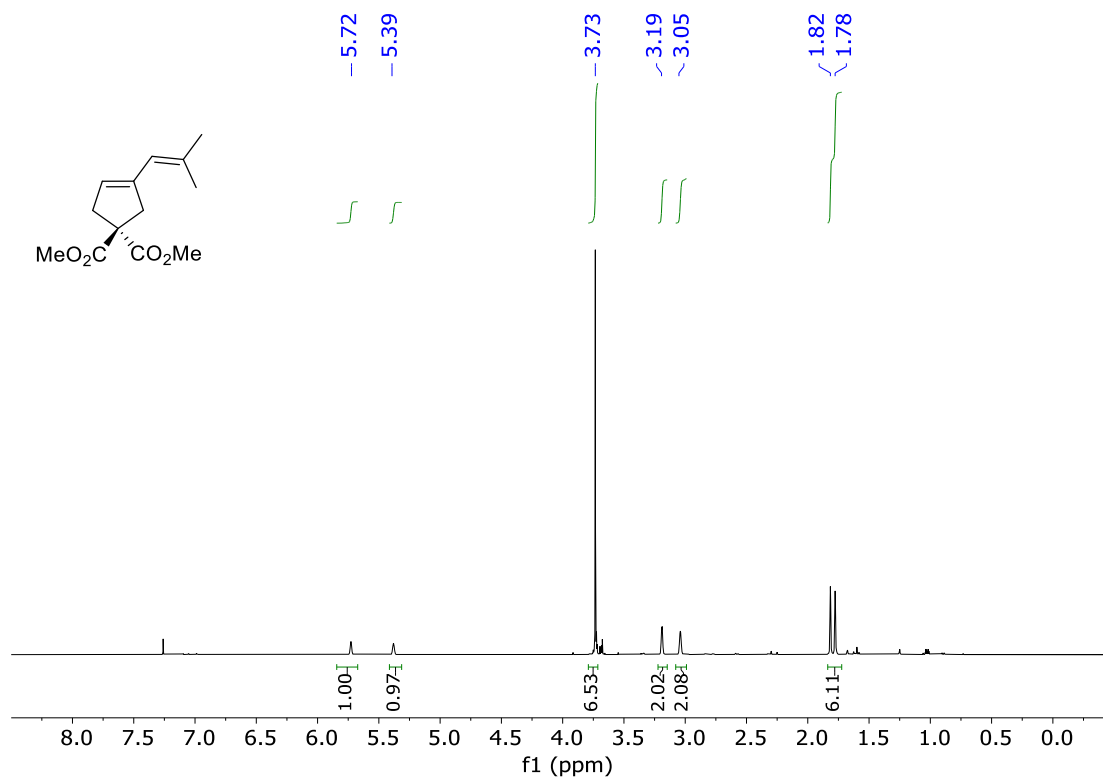

$^{13}\text{C}$  NMR (100 MHz,  $\text{CDCl}_3$ , 300 K) spectrum of **1a**

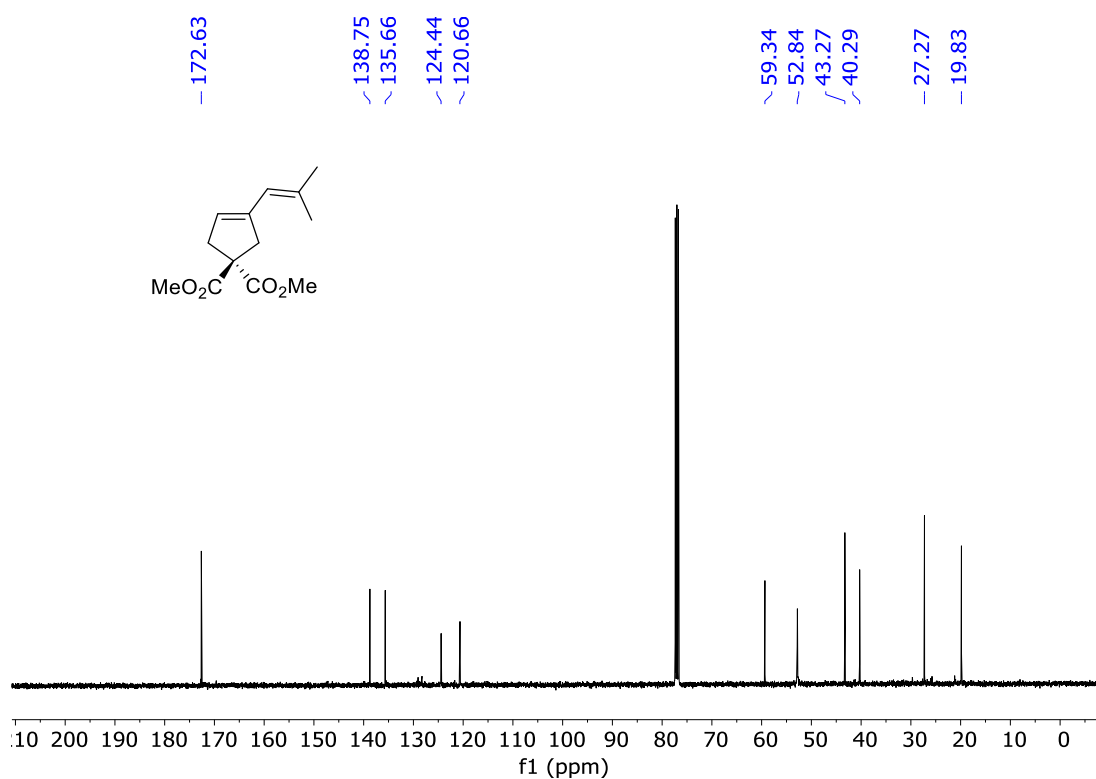

$^1\text{H}$  NMR (300 MHz,  $\text{CDCl}_3$ , 300 K) spectrum of **3a**

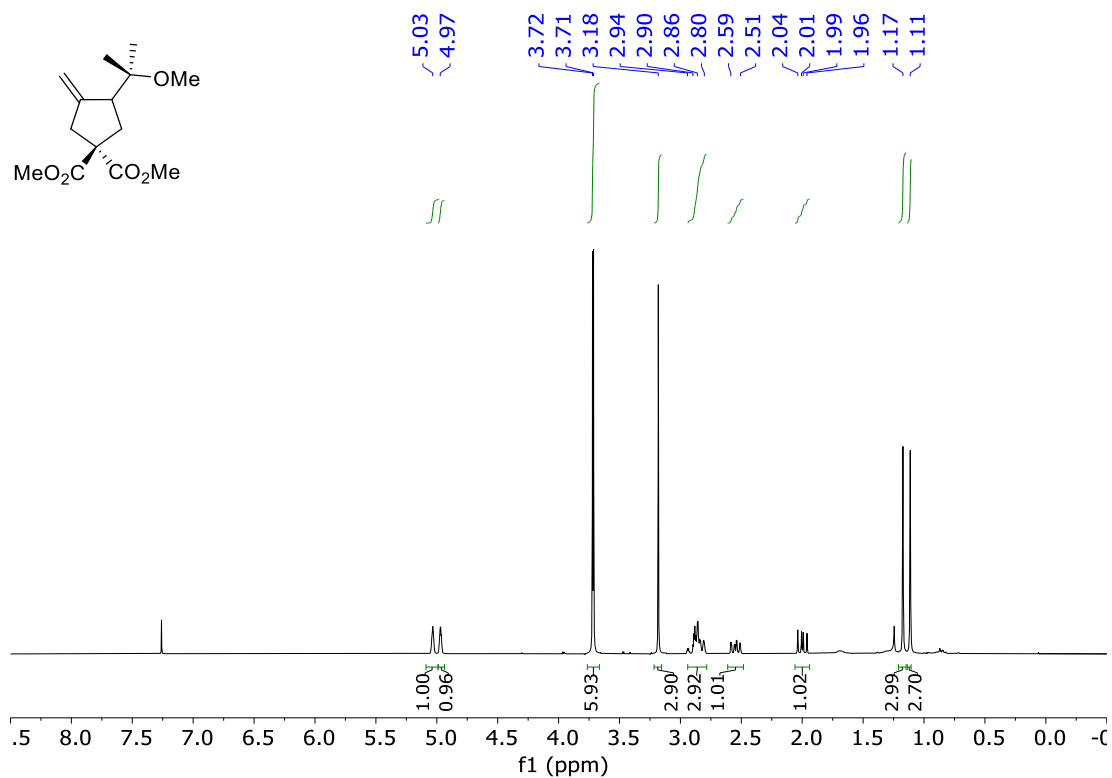

$^{13}\text{C}$  NMR (75 MHz,  $\text{CDCl}_3$ , 300 K) spectrum of **3a**

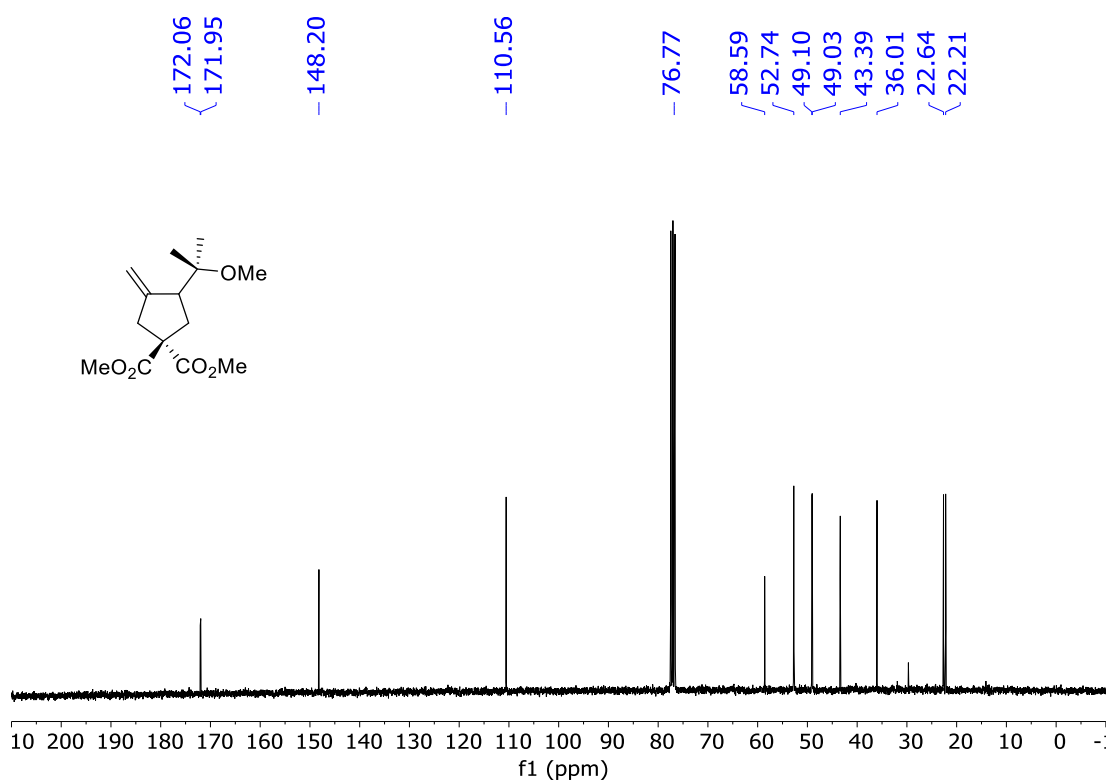

NOESY (300 MHz, CDCl<sub>3</sub>, 300 K) spectrum of **3a**

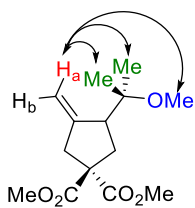

$\delta$  (**Ha**) = 4.97 ppm

$\delta$  (2 x **Me**) = 3.71 and 3.72 ppm

$\delta$  (**OMe**) = 3.18 ppm

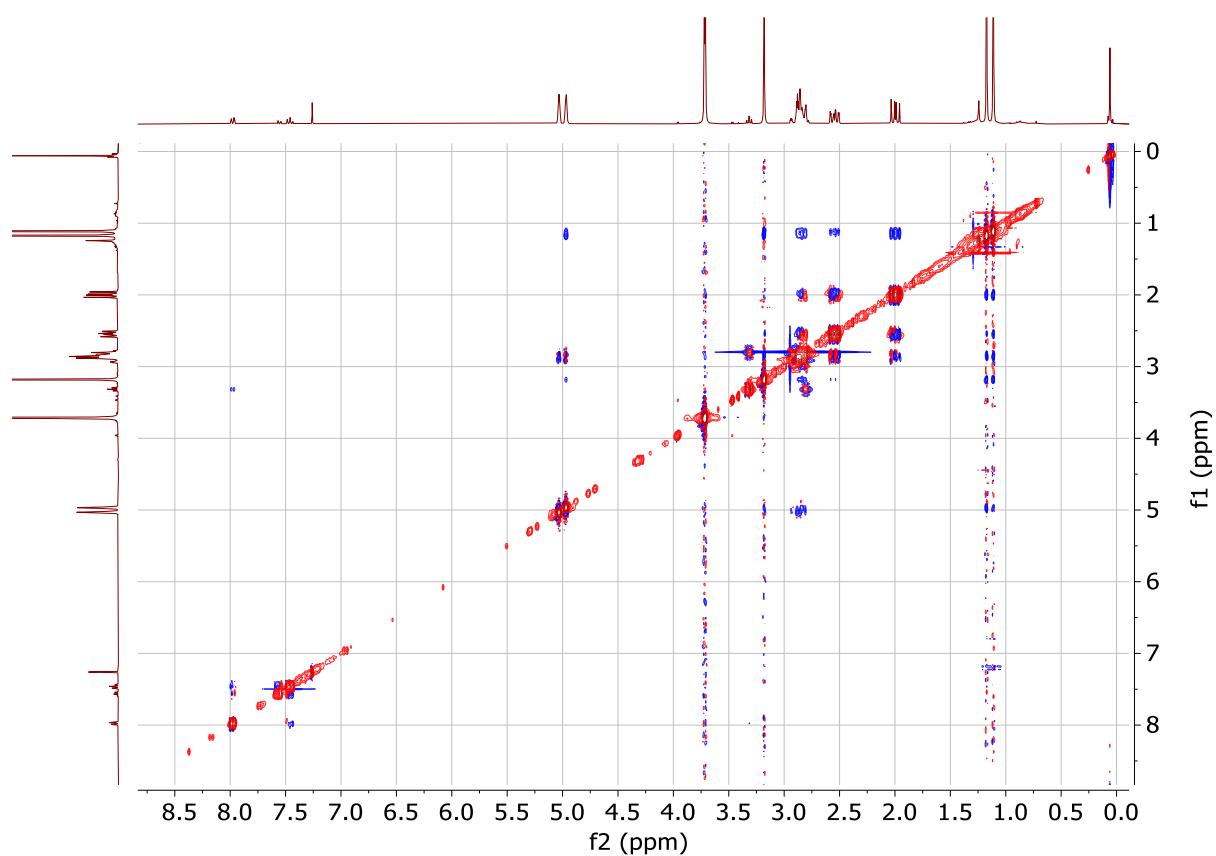

$^1\text{H}$  NMR (300 MHz,  $\text{CDCl}_3$ , 300 K) spectrum of **3b**

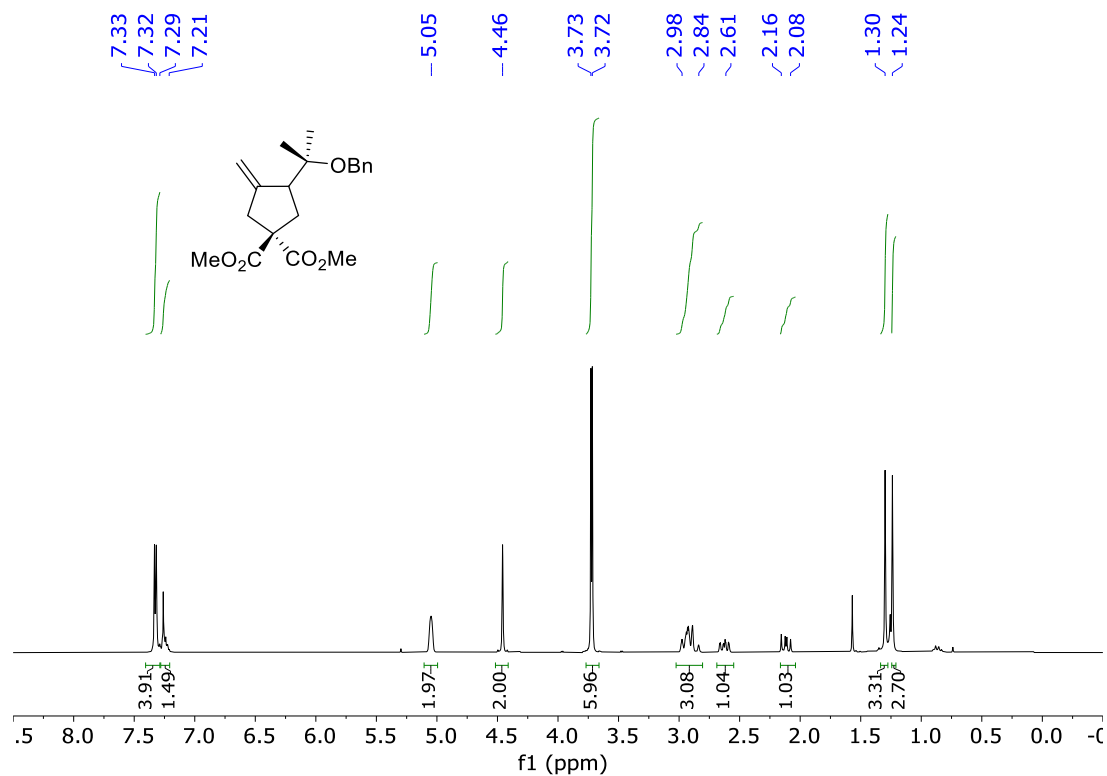

$^{13}\text{C}$  NMR (75 MHz,  $\text{CDCl}_3$ , 300 K) spectrum of **3b**

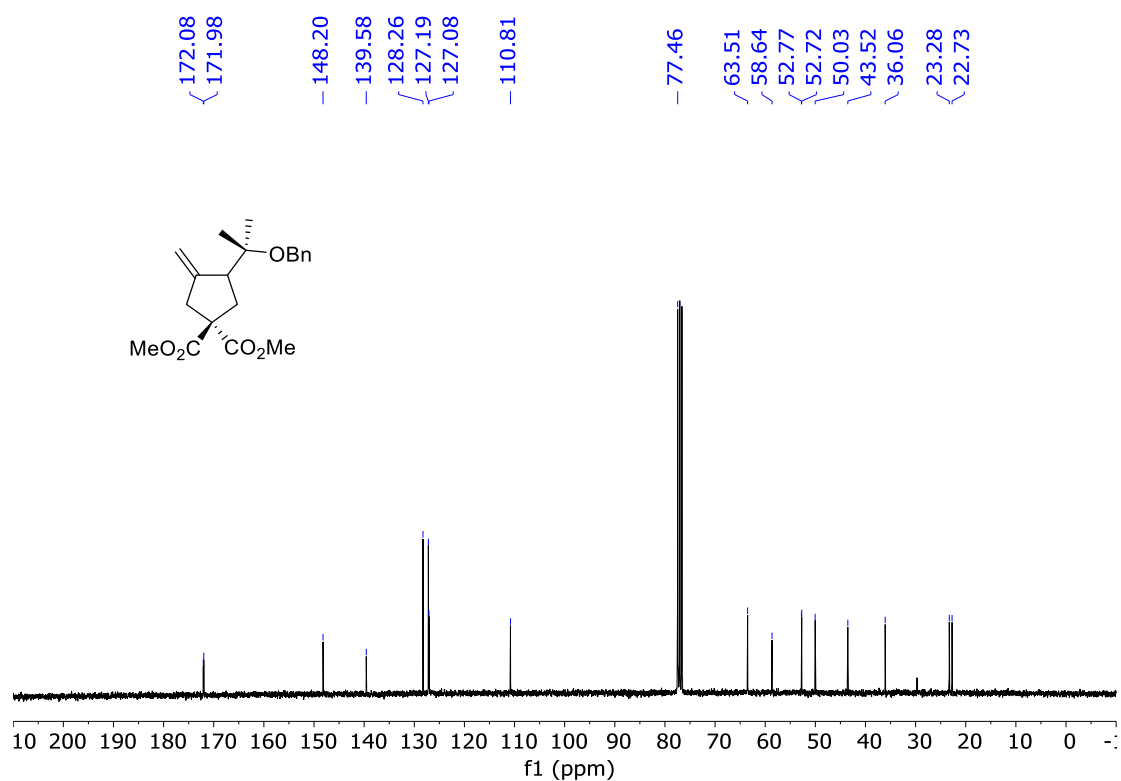



$^1\text{H}$  NMR (300 MHz,  $\text{CDCl}_3$ , 300 K) spectrum of **3c**

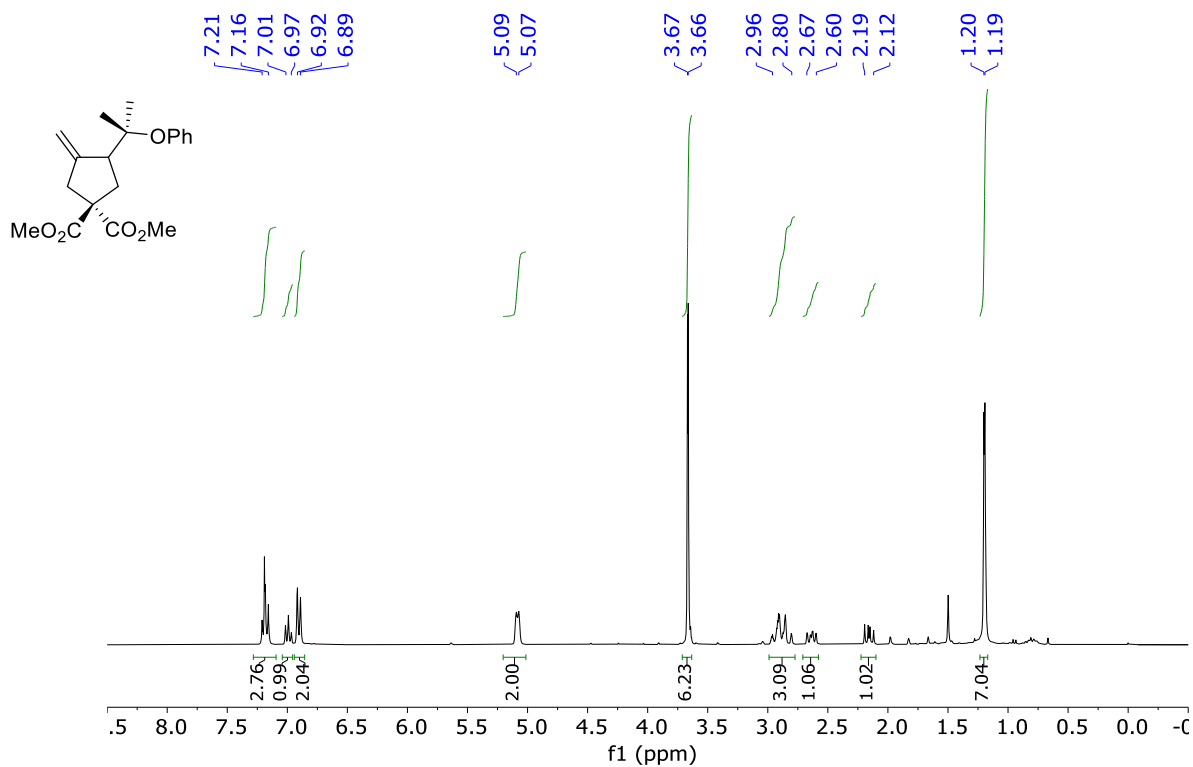

$^{13}\text{C}$  NMR (75 MHz,  $\text{CDCl}_3$ , 300 K) spectrum of **3c**

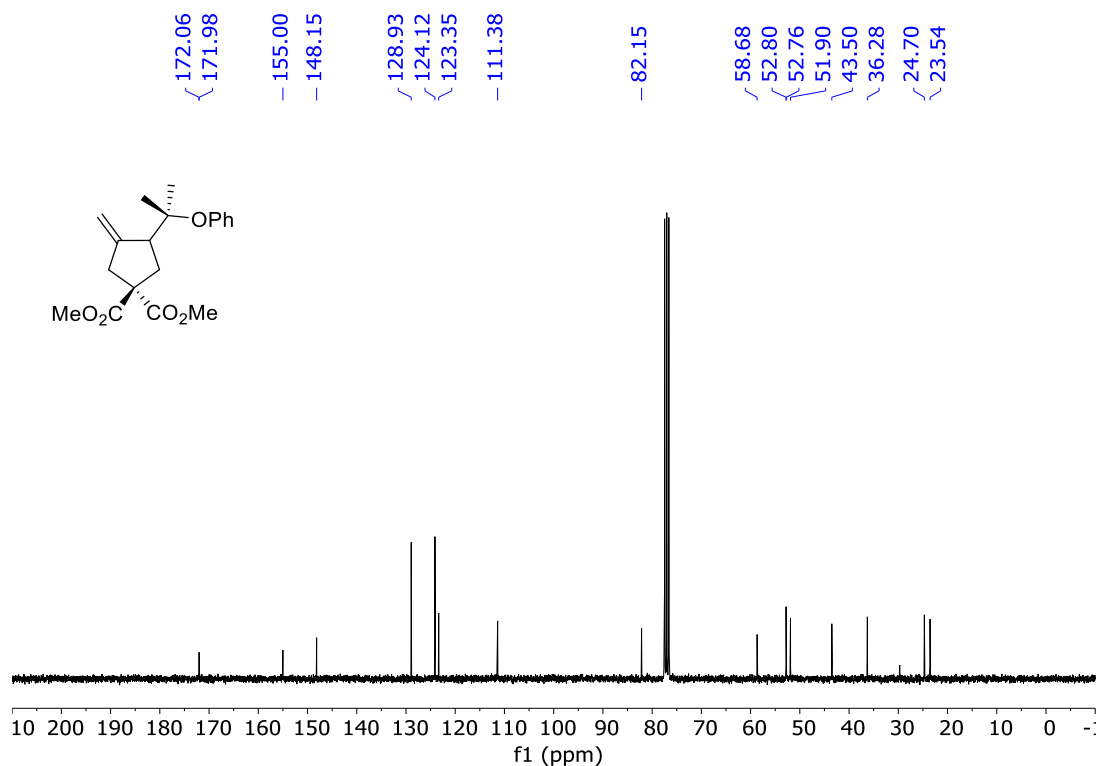

$^1\text{H}$  NMR (300 MHz,  $\text{CDCl}_3$ , 300 K) spectrum of **3d**

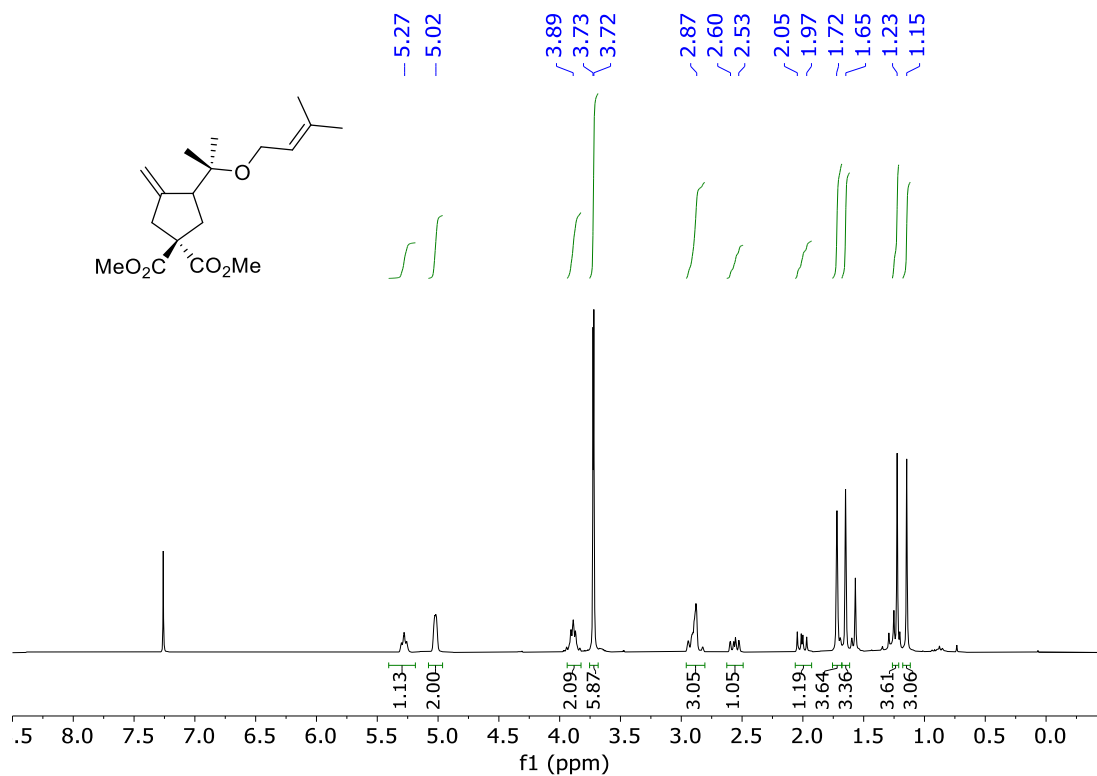

$^{13}\text{C}$  NMR (75 MHz,  $\text{CDCl}_3$ , 300 K) spectrum of **3d**

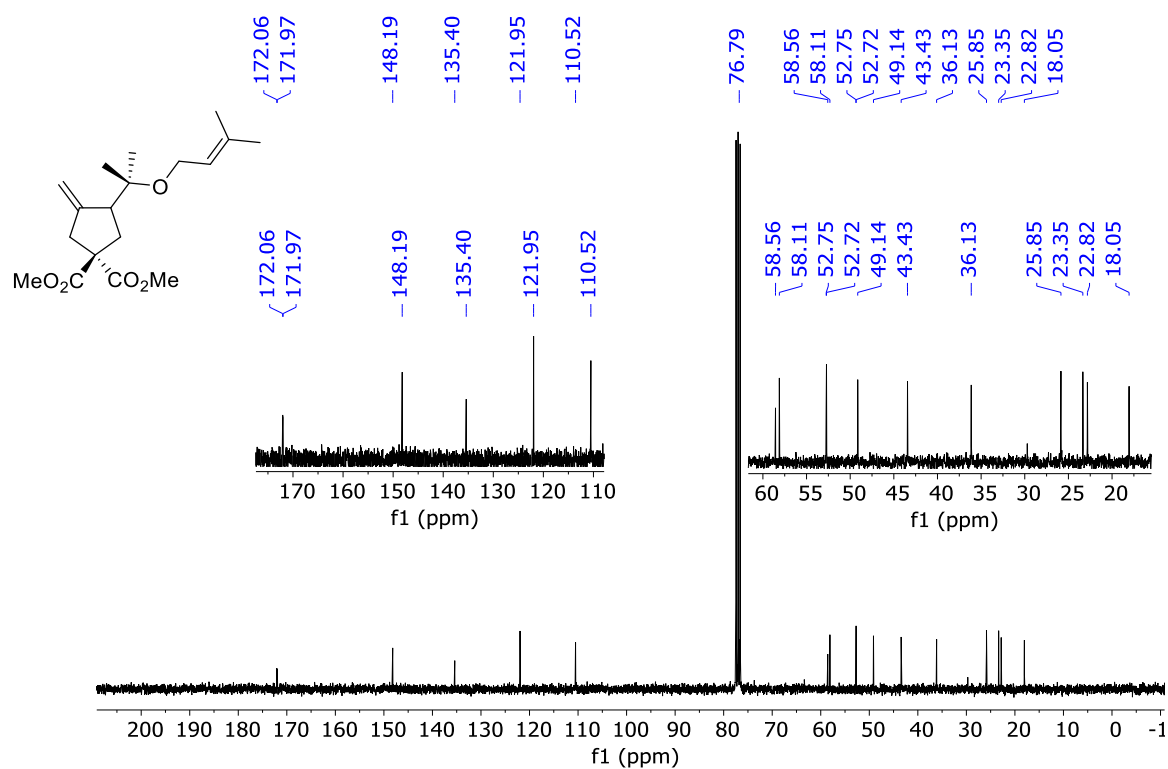

$^1\text{H}$  NMR (300 MHz,  $\text{CDCl}_3$ , 300 K) spectrum of **3e**

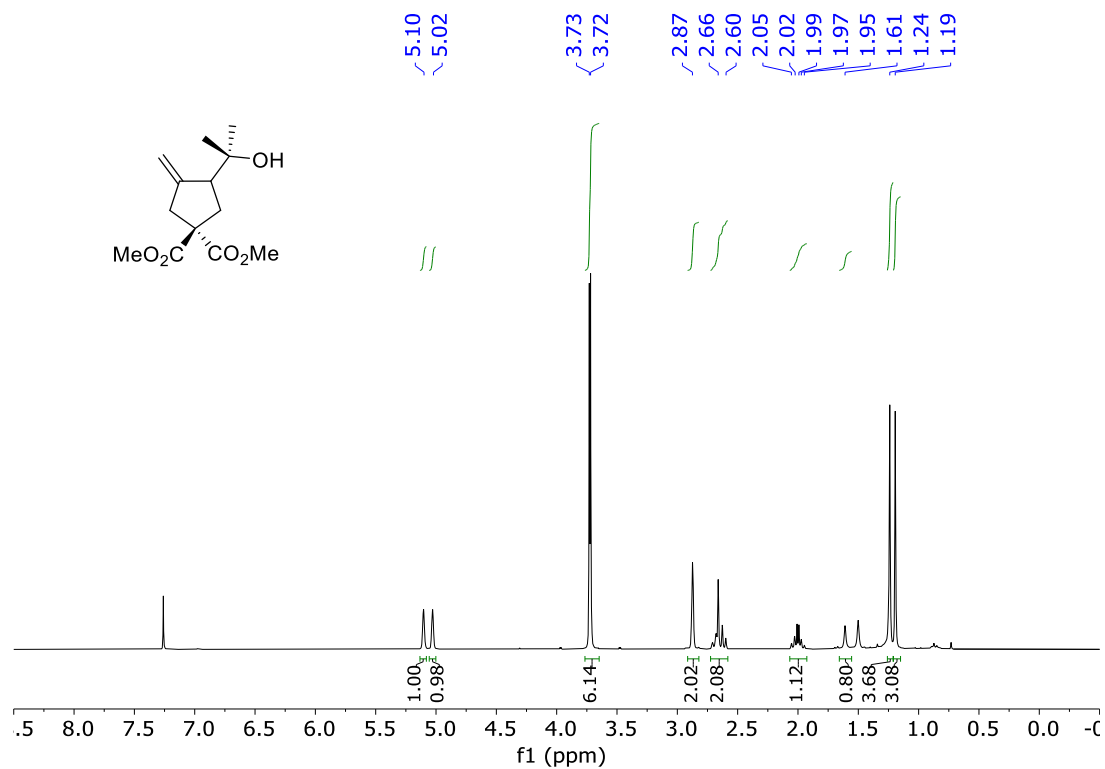

$^{13}\text{C}$  NMR (75 MHz,  $\text{CDCl}_3$ , 300 K) spectrum of **3e**

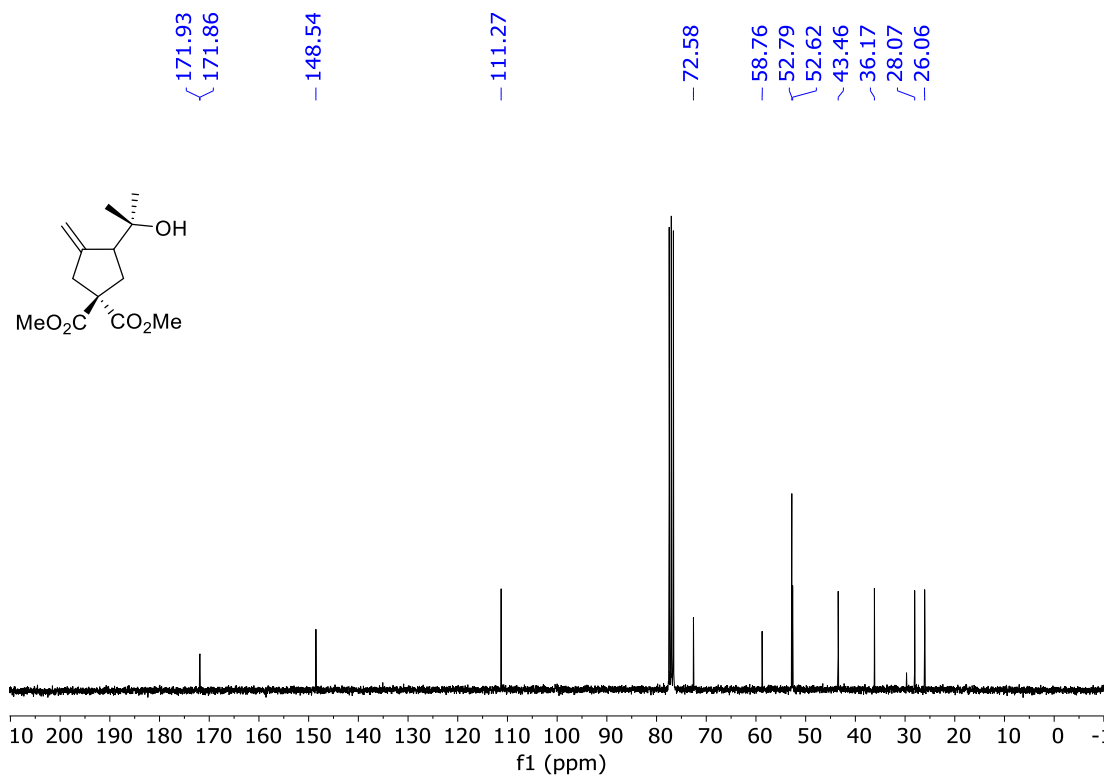

$^1\text{H}$  NMR (300 MHz,  $\text{CDCl}_3$ , 300 K) spectrum of **3f**

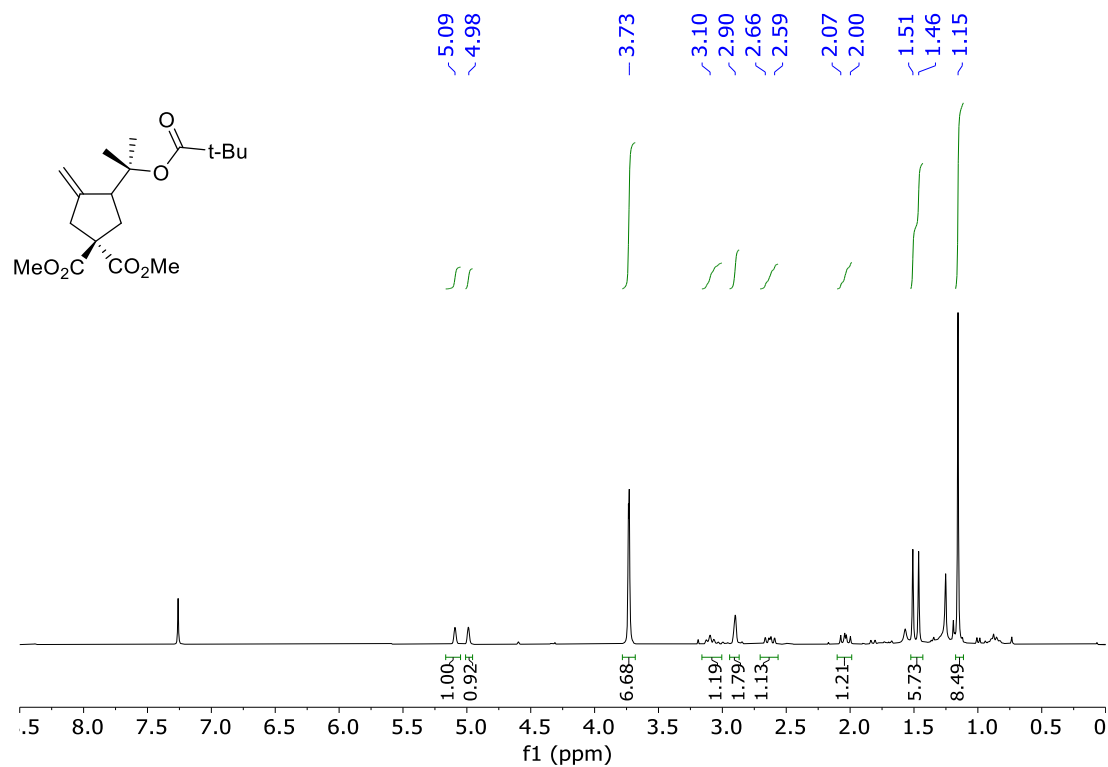

$^{13}\text{C}$  NMR (75 MHz,  $\text{CDCl}_3$ , 300 K) spectrum of **3f**

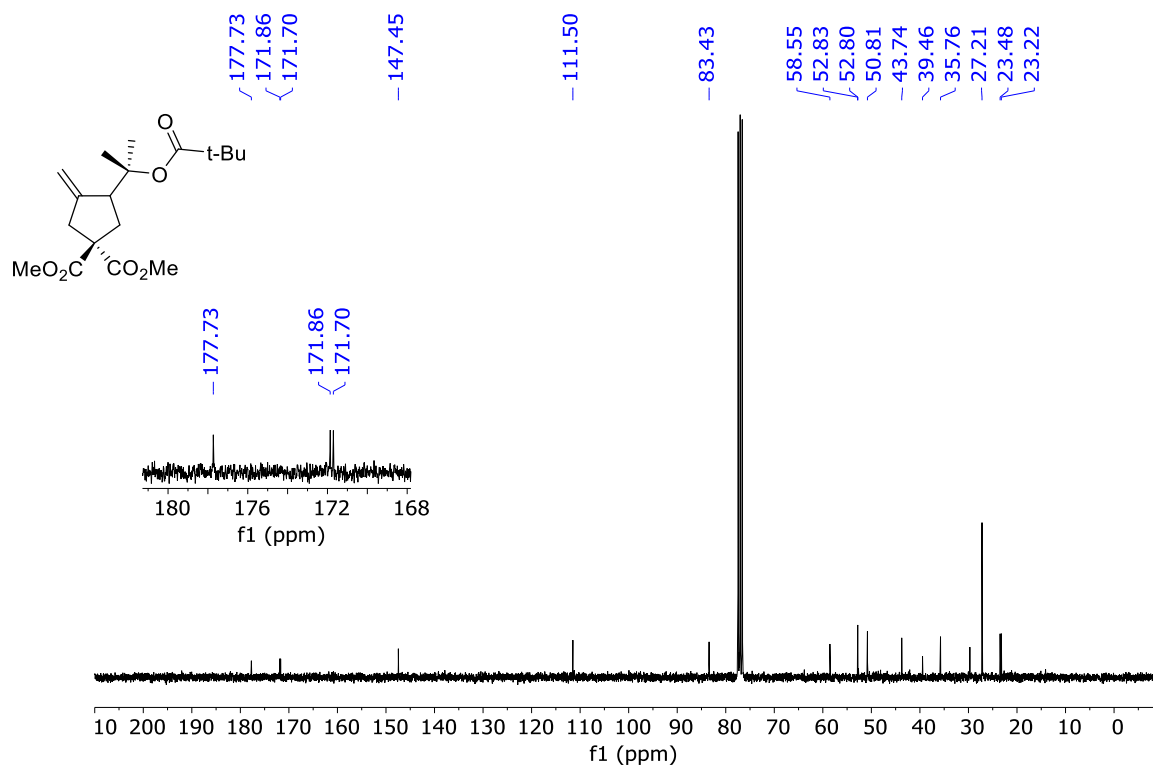

$^1\text{H}$  NMR (300 MHz,  $\text{CDCl}_3$ , 300 K) spectrum of **3g**

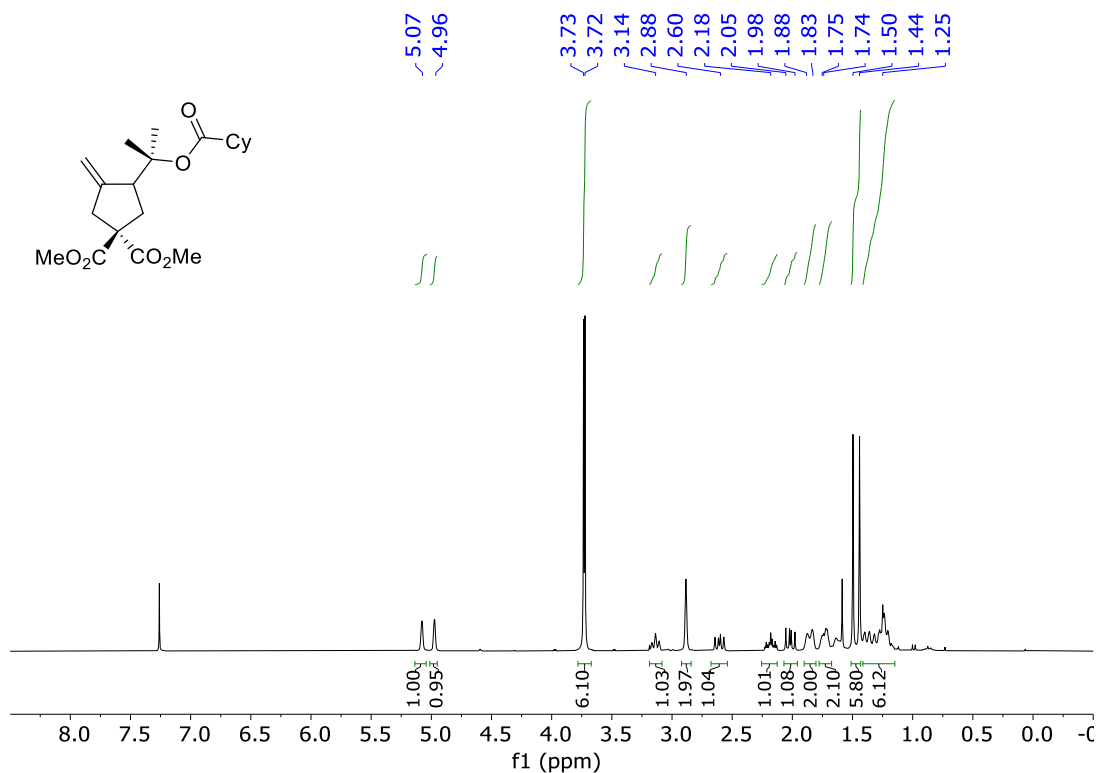

$^{13}\text{C}$  NMR (75 MHz,  $\text{CDCl}_3$ , 300 K) spectrum of **3g**

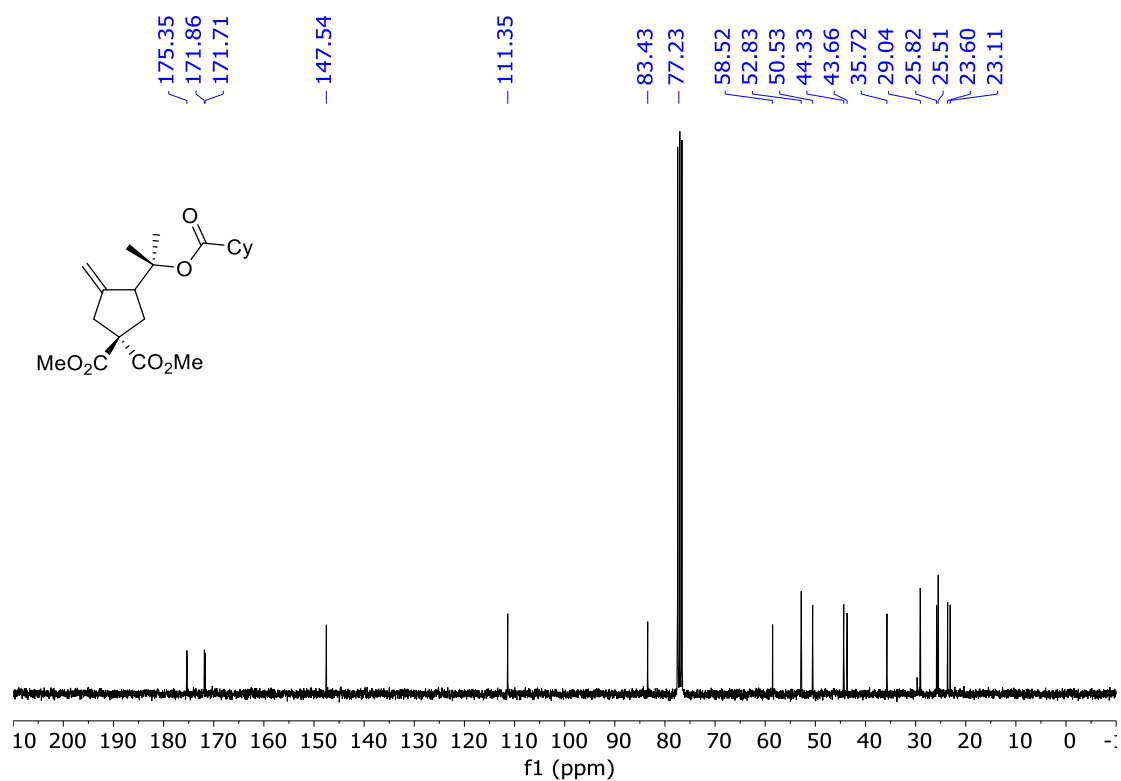

$^1\text{H}$  NMR (300 MHz,  $\text{CDCl}_3$ , 300 K) spectrum of **3h**

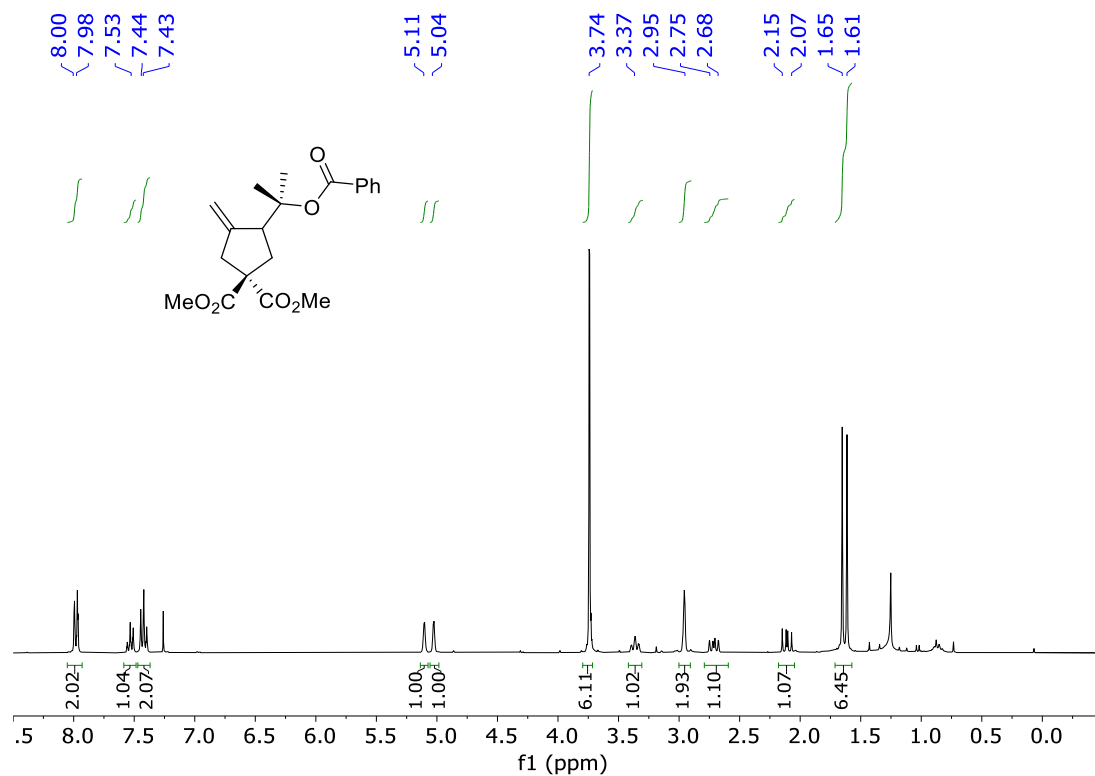

$^{13}\text{C}$  NMR (75 MHz,  $\text{CDCl}_3$ , 300 K) spectrum of **3h**

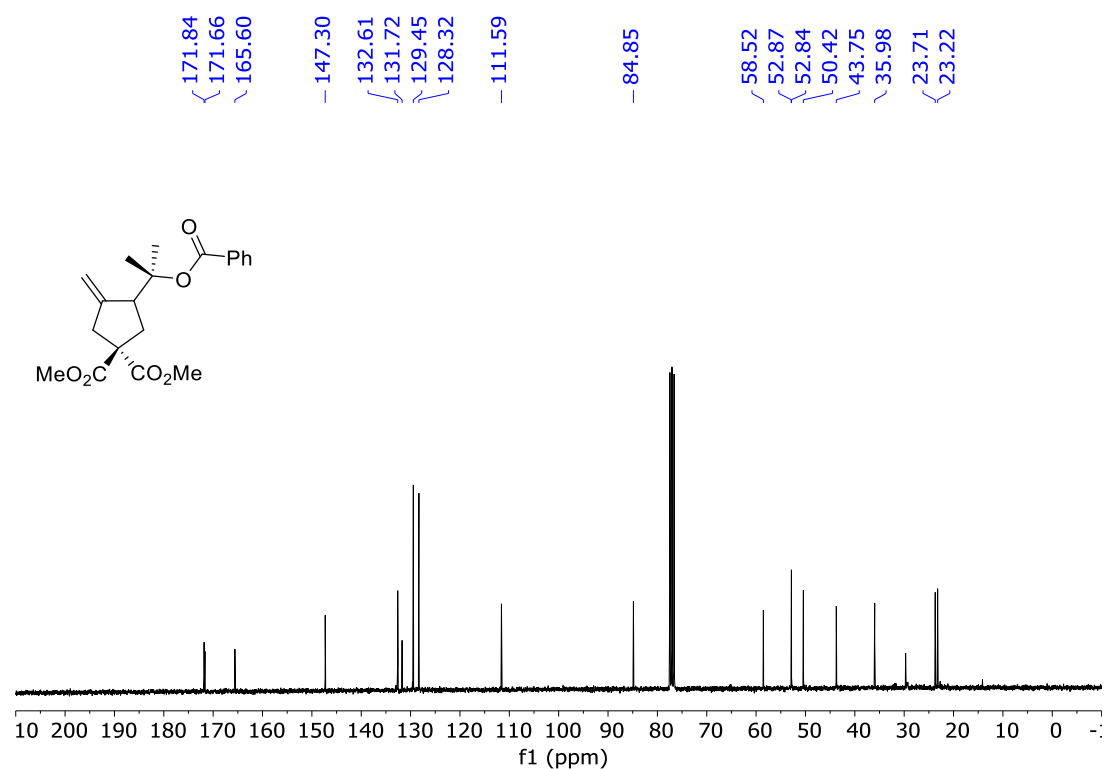

$^1\text{H}$  NMR (300 MHz,  $\text{CDCl}_3$ , 300 K) spectrum of **3i**

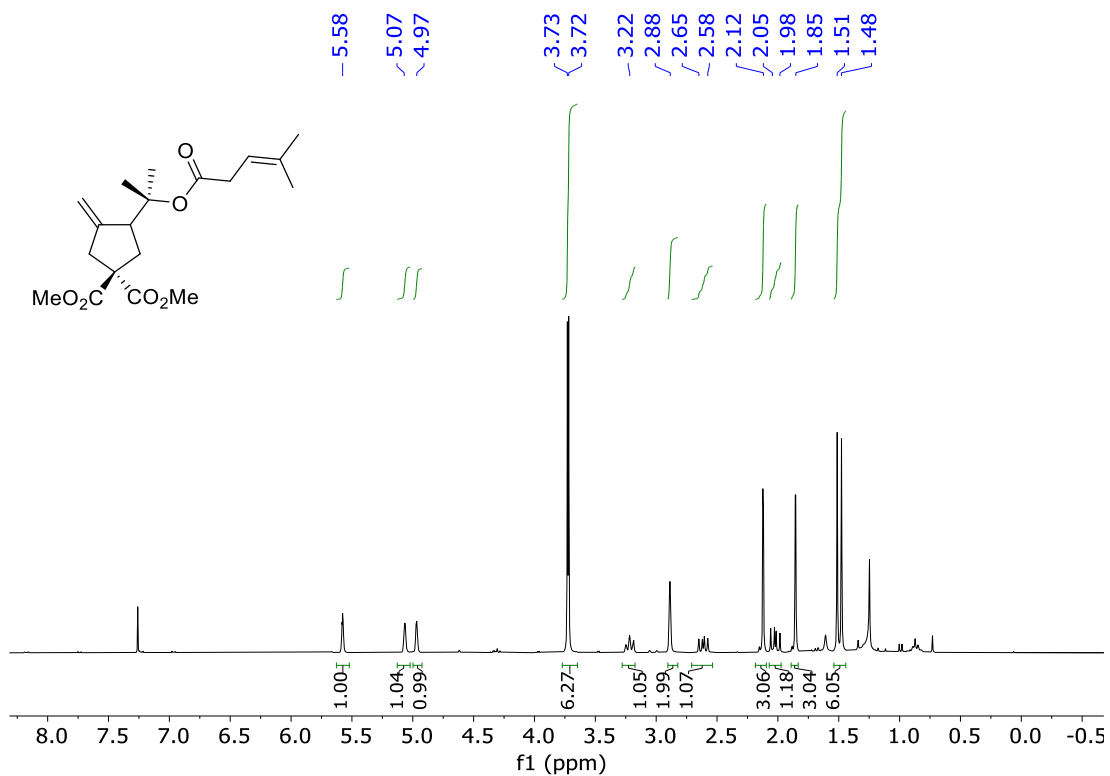

$^{13}\text{C}$  NMR (75 MHz,  $\text{CDCl}_3$ , 300 K) spectrum of **3i**

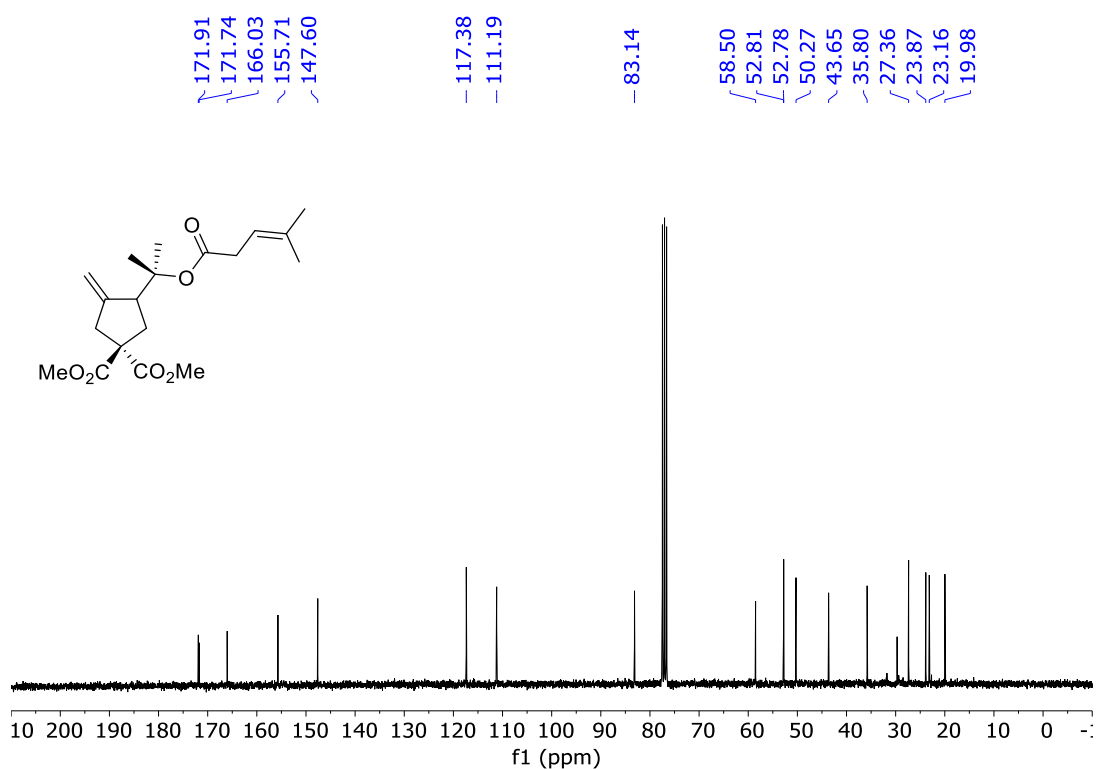

$^1\text{H}$  NMR (300 MHz,  $\text{CDCl}_3$ , 300 K) spectrum of **3j**

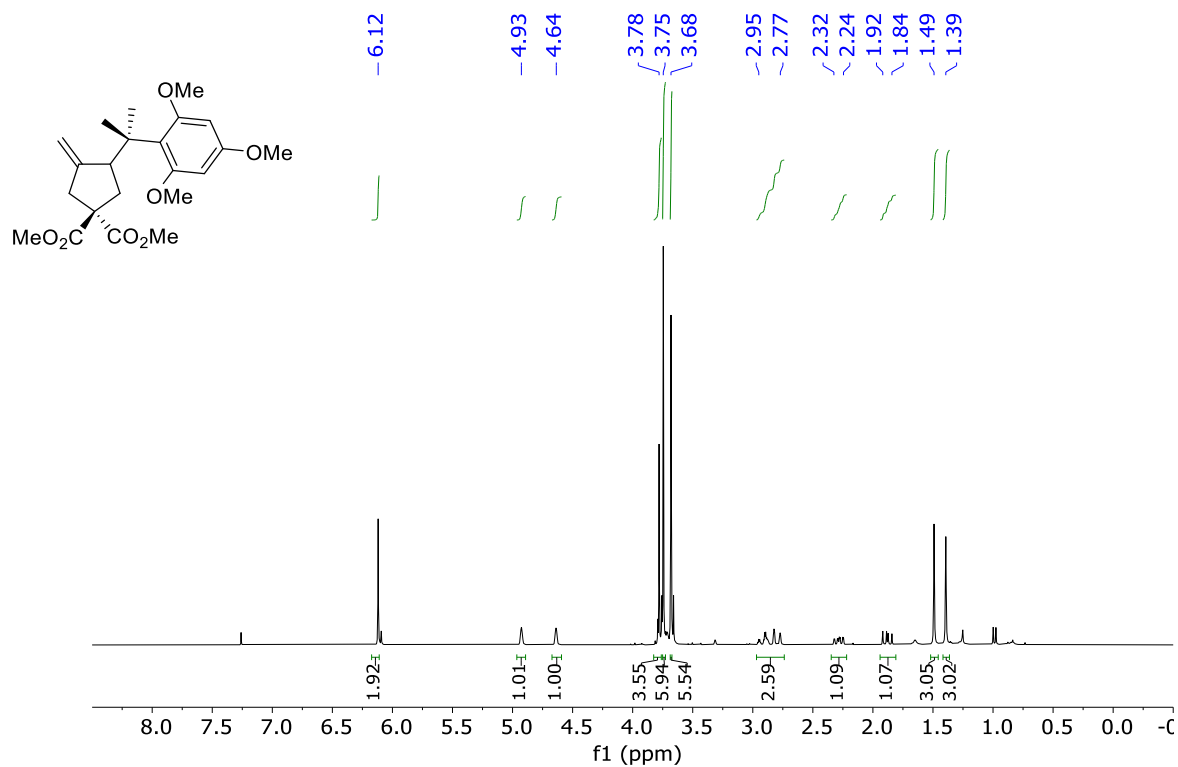

$^{13}\text{C}$  NMR (75 MHz,  $\text{CDCl}_3$ , 300 K) spectrum of **3j**

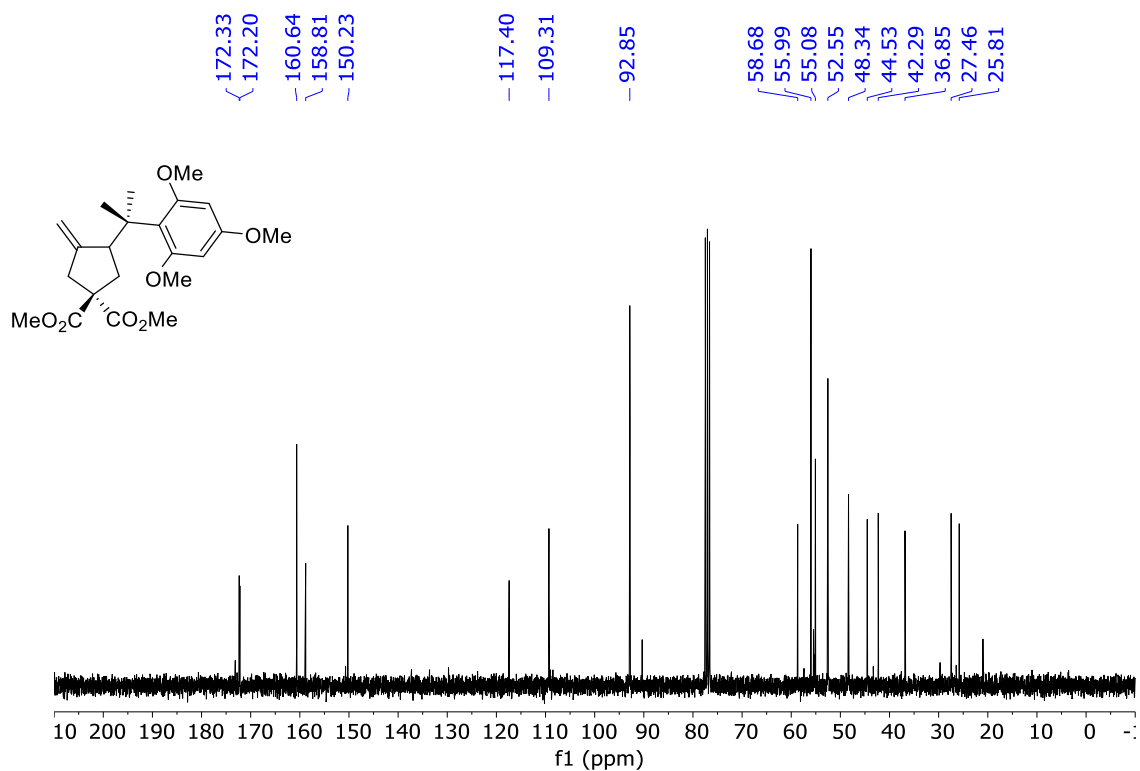



2D NMR (300 MHz, CDCl<sub>3</sub>, 300 K) spectra of **3j**

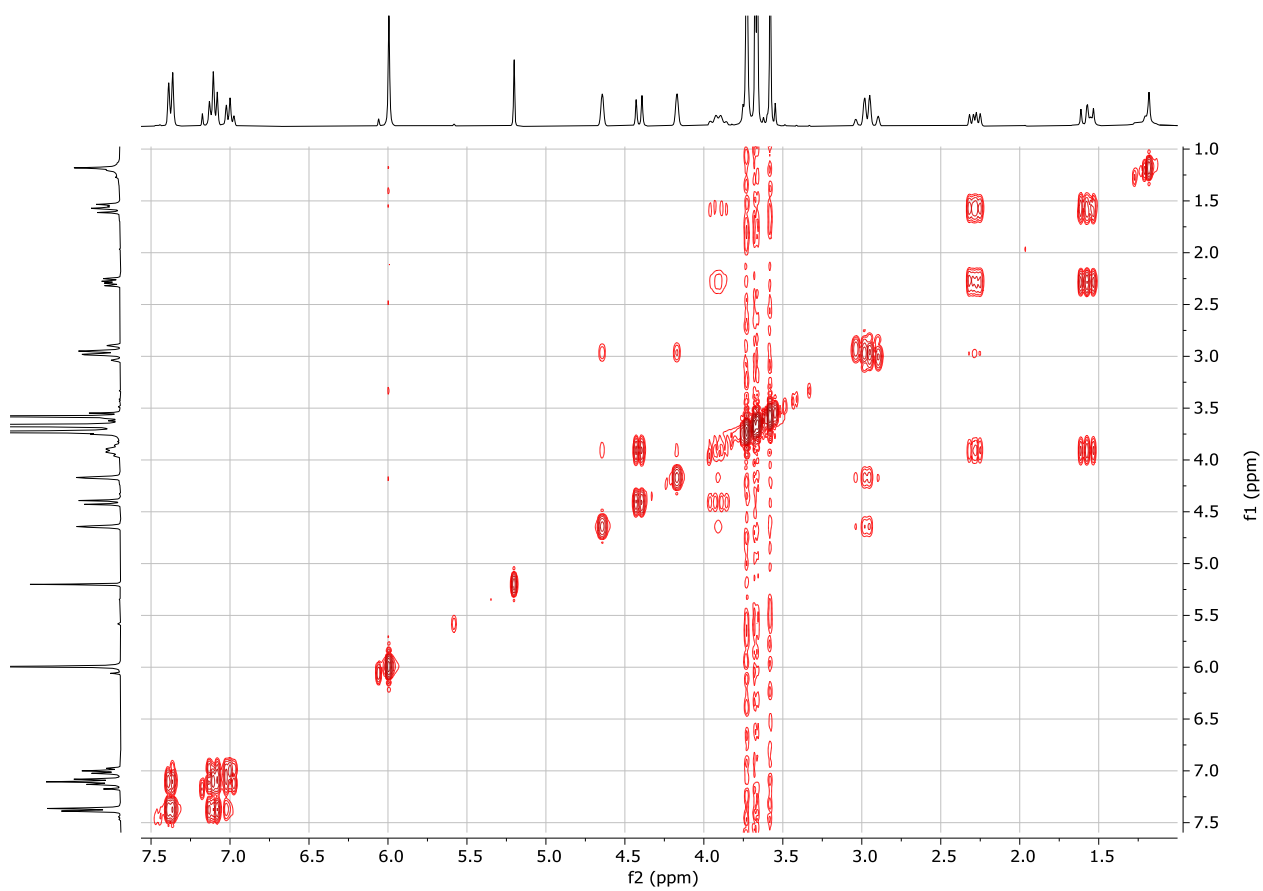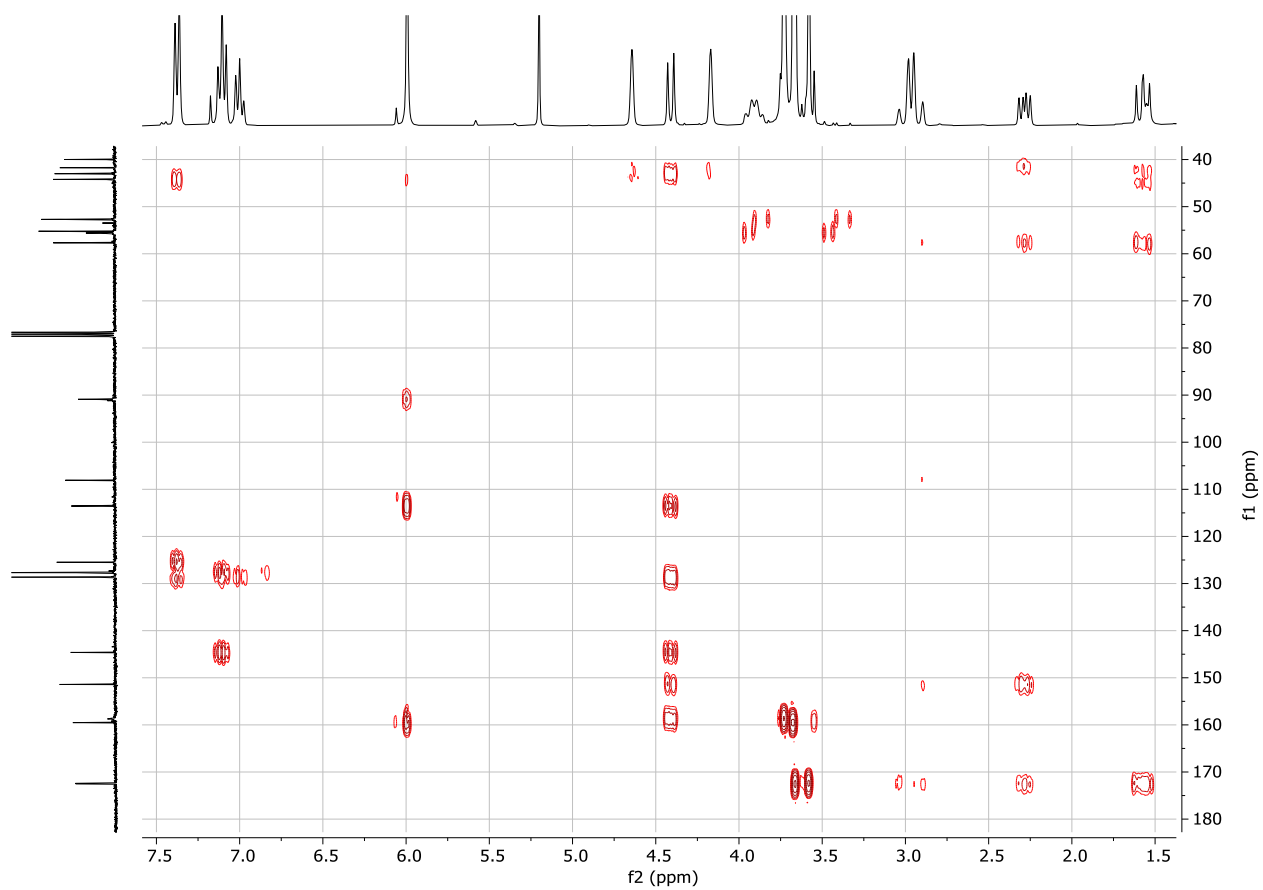

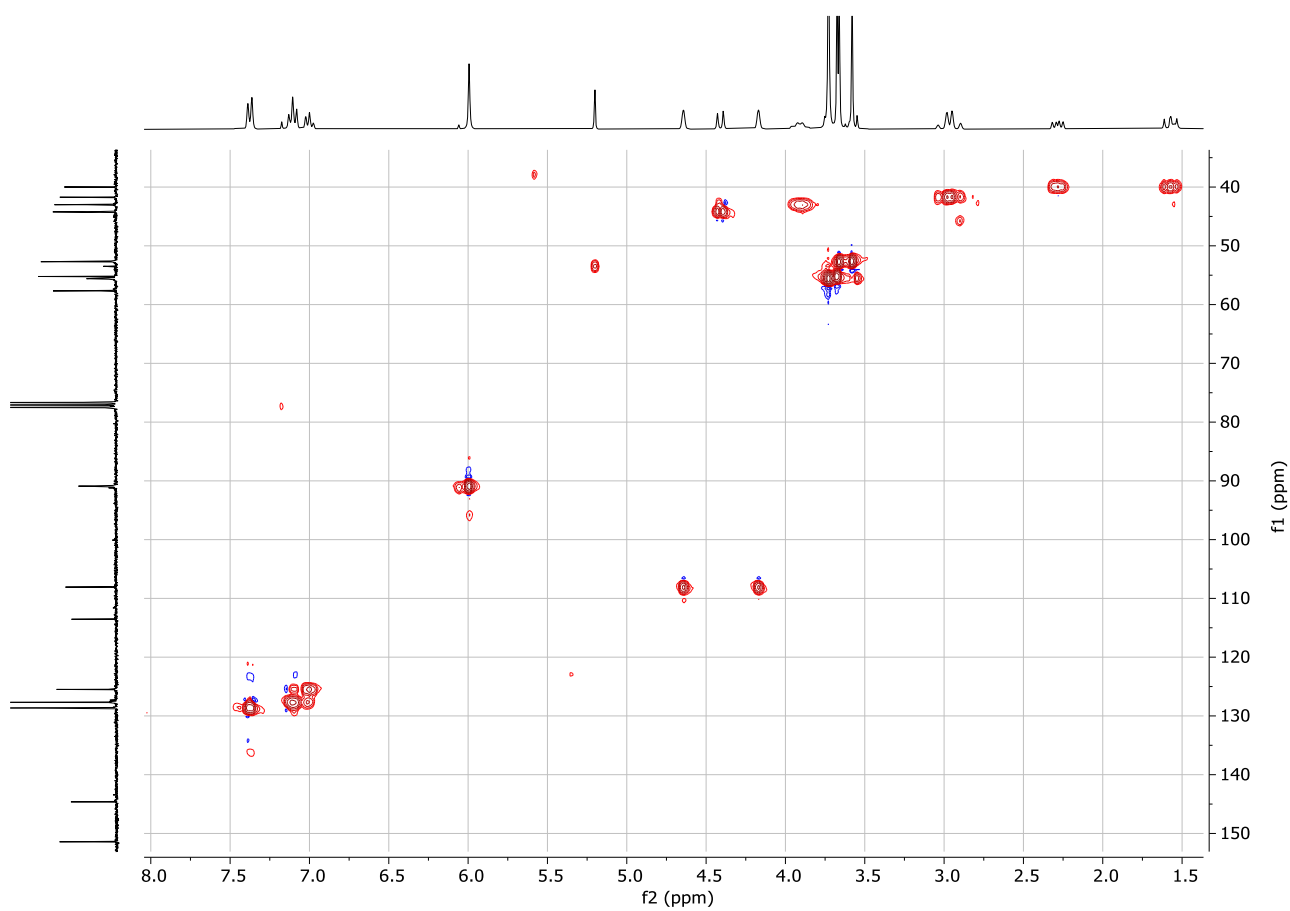

$^1\text{H}$  NMR (300 MHz,  $\text{CDCl}_3$ , 300 K) spectrum of **3k**

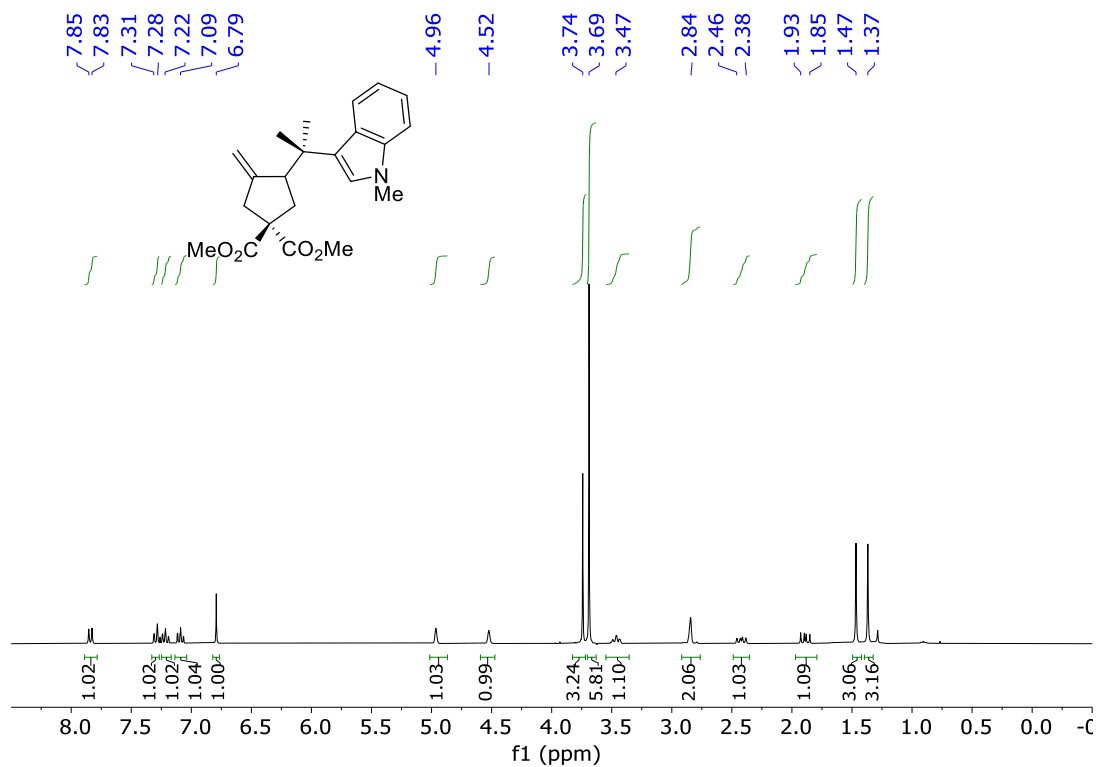

$^{13}\text{C}$  NMR (75 MHz,  $\text{CDCl}_3$ , 300 K) spectrum of **3k**

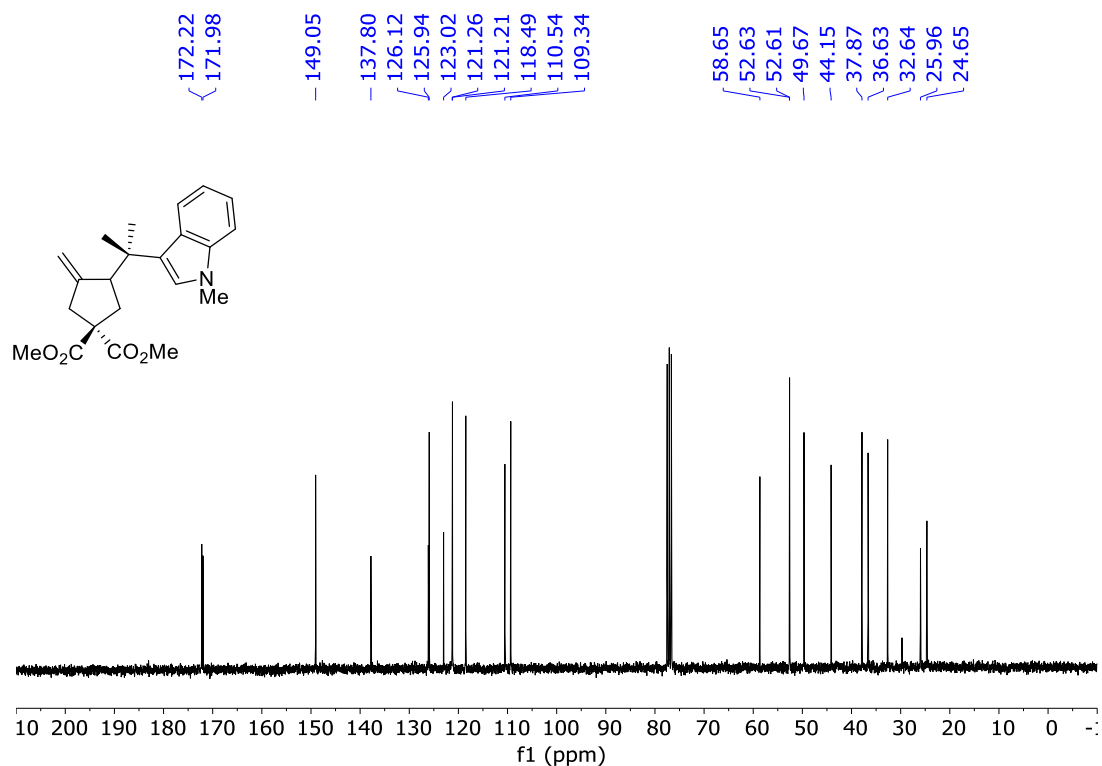

$^1\text{H}$  NMR (300 MHz,  $\text{CDCl}_3$ , 300 K) spectrum of **3I**

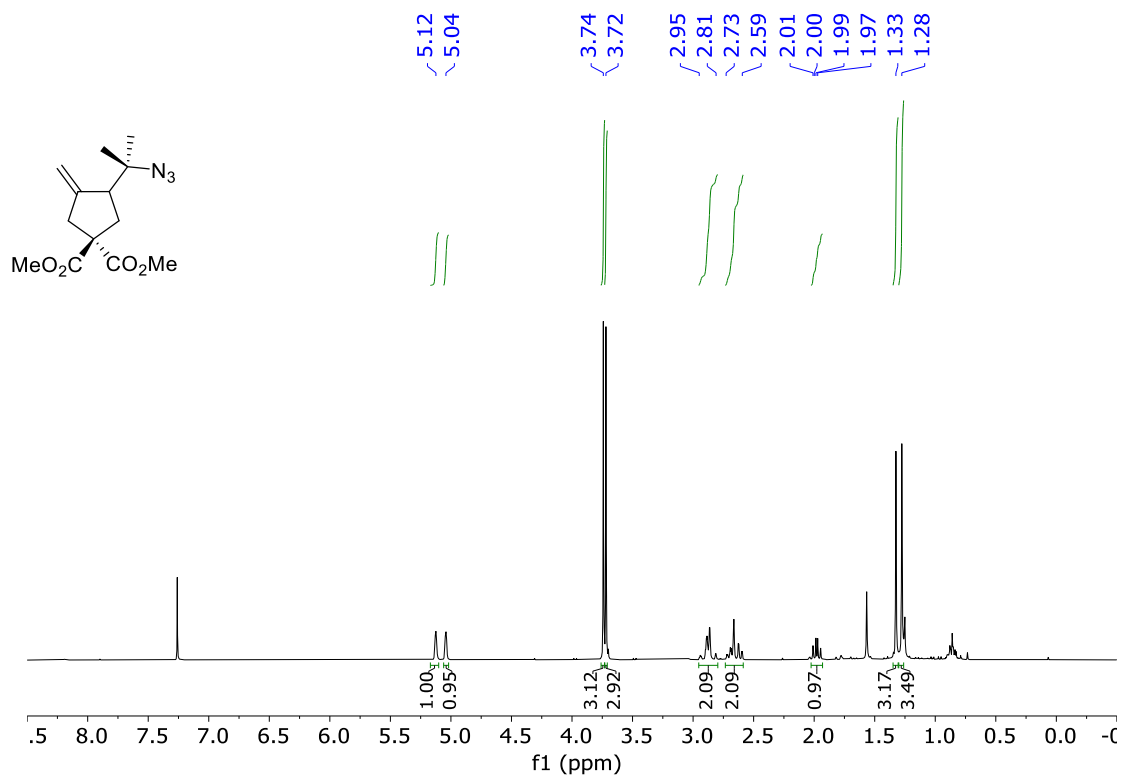

$^{13}\text{C}$  NMR (75 MHz,  $\text{CDCl}_3$ , 300 K) spectrum of **3I**

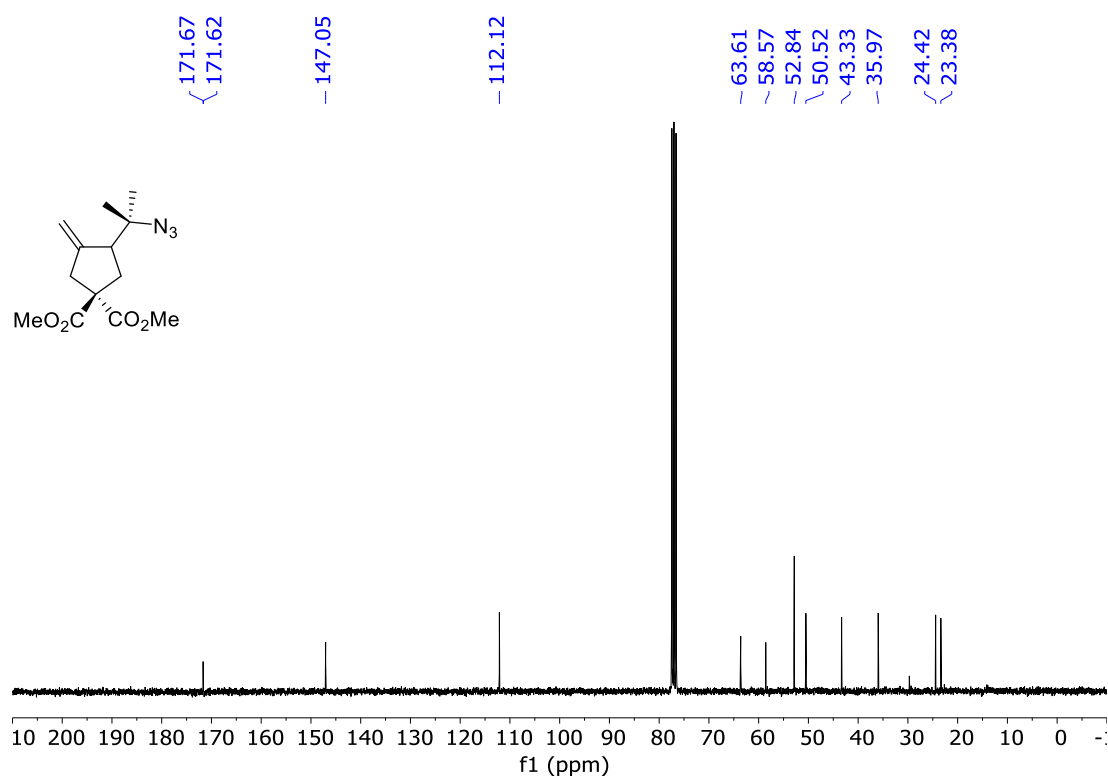

$^1\text{H}$  NMR (300 MHz,  $\text{CDCl}_3$ , 300 K) spectrum of **3m**

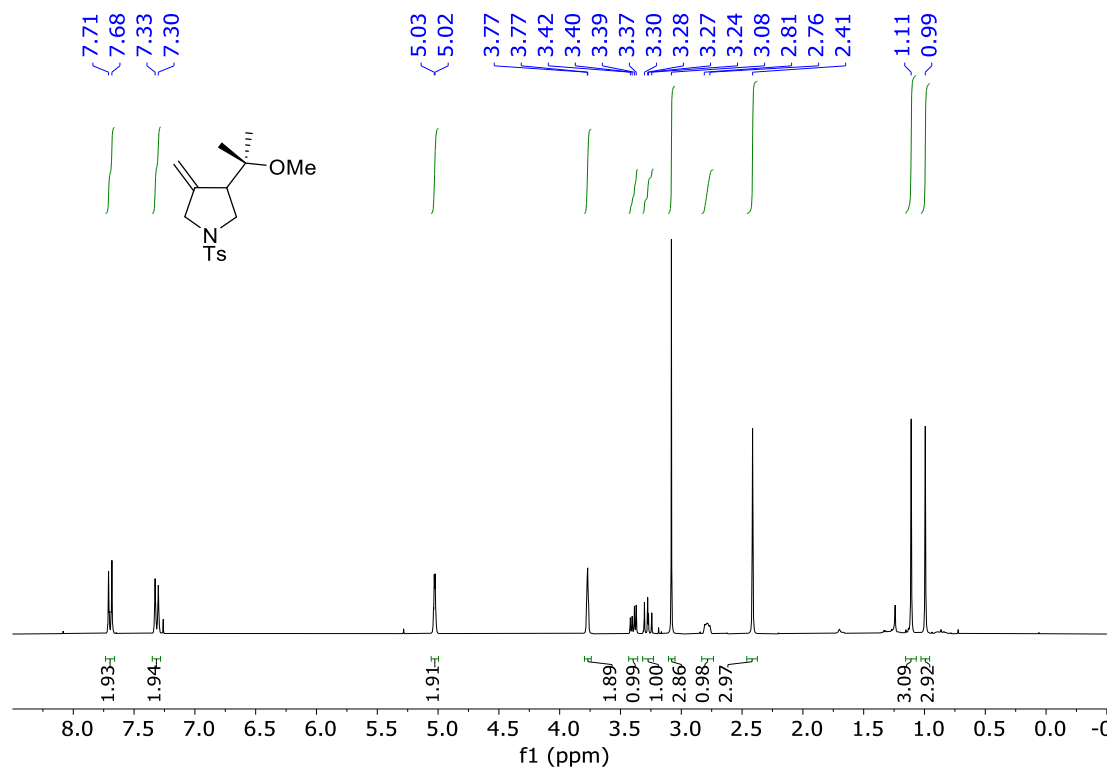

$^{13}\text{C}$  NMR (75 MHz,  $\text{CDCl}_3$ , 300 K) spectrum of **3m**

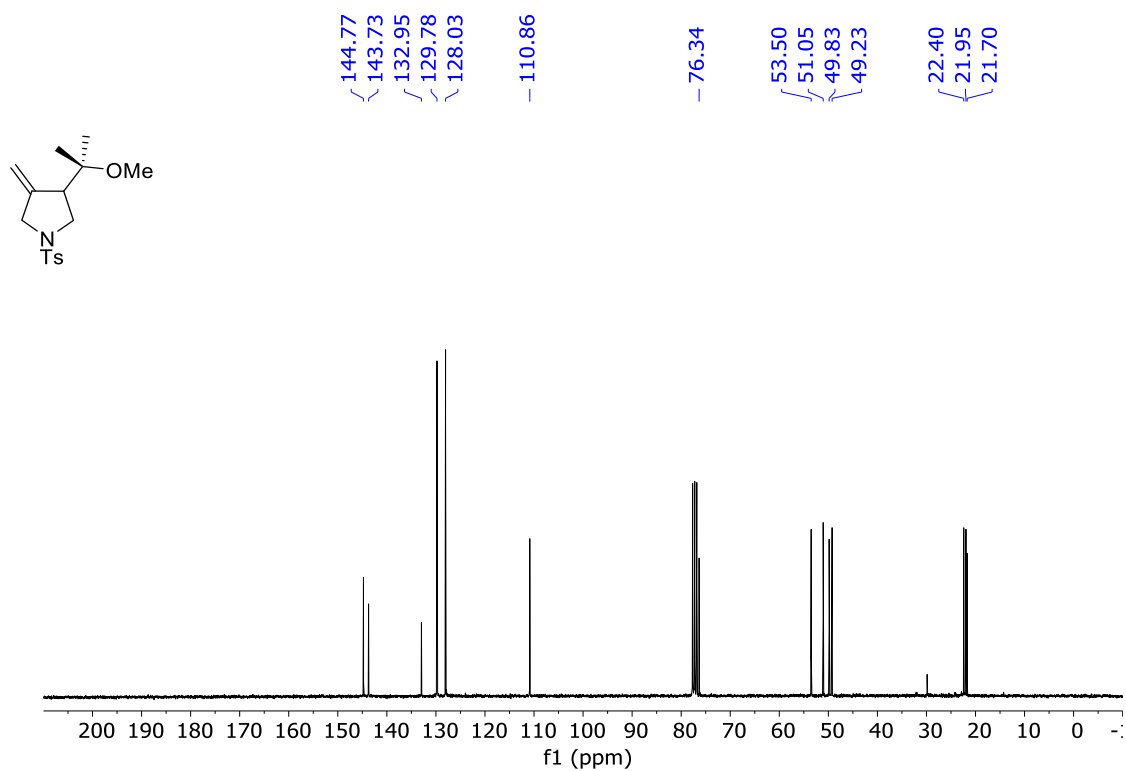

$^1\text{H}$  NMR (300 MHz,  $\text{CDCl}_3$ , 300 K) spectrum of **3n**

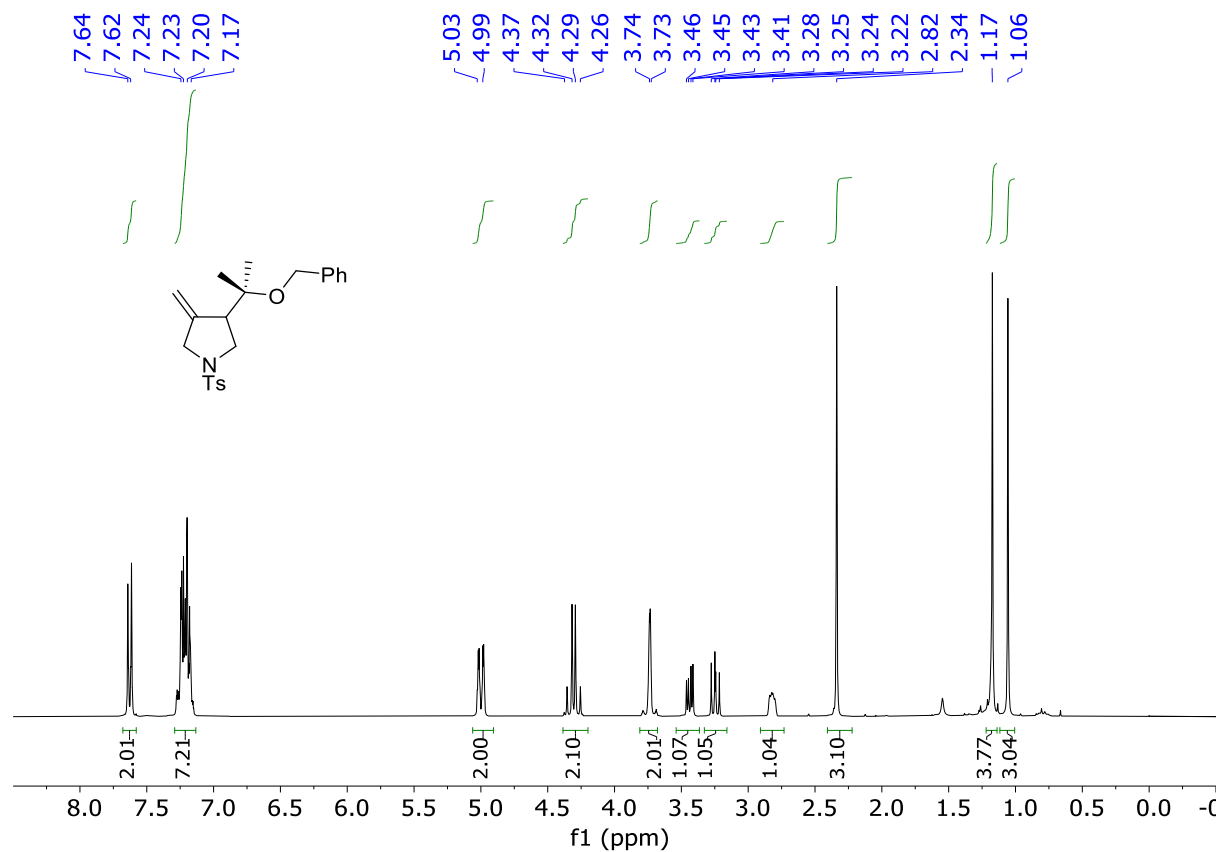

$^{13}\text{C}$  NMR (75 MHz,  $\text{CDCl}_3$ , 300 K) spectrum of **3n**

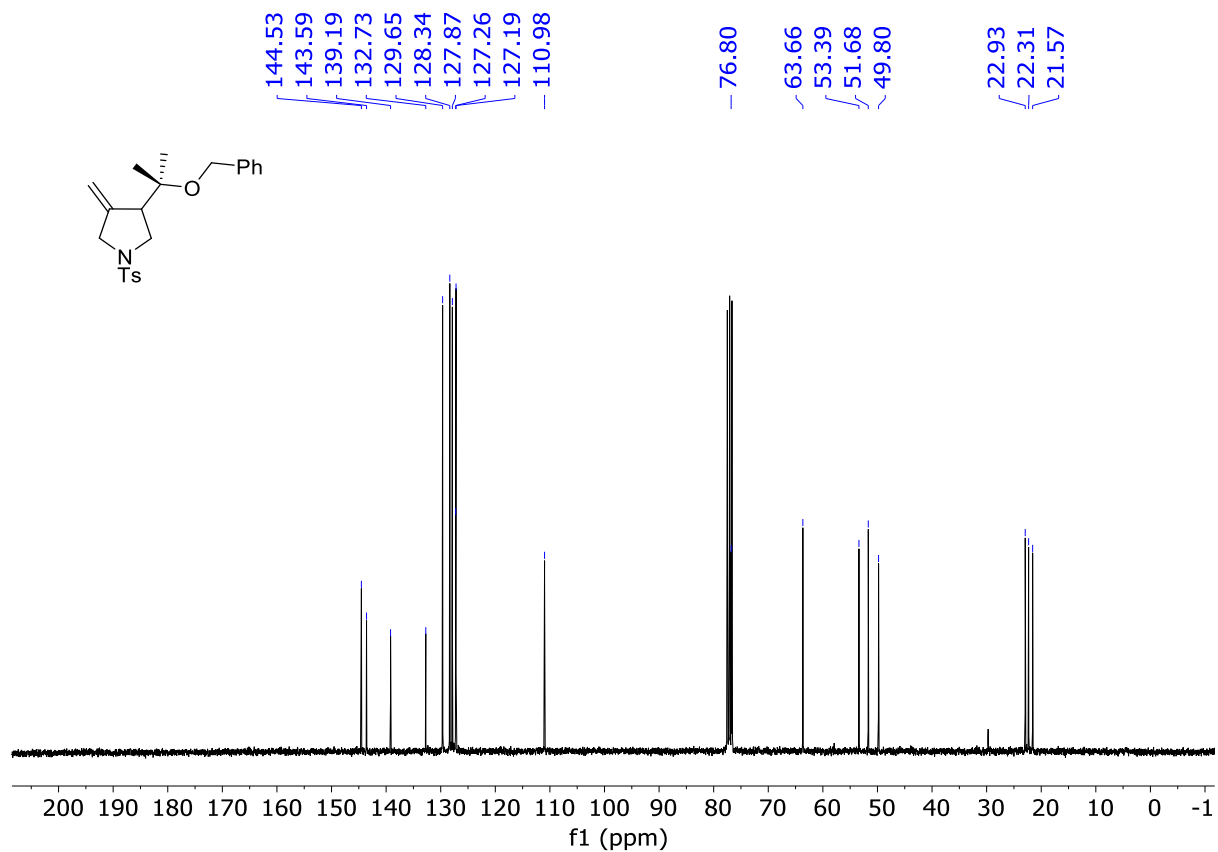

$^1\text{H}$  NMR (300 MHz,  $\text{CDCl}_3$ , 300 K) spectrum of **3o**

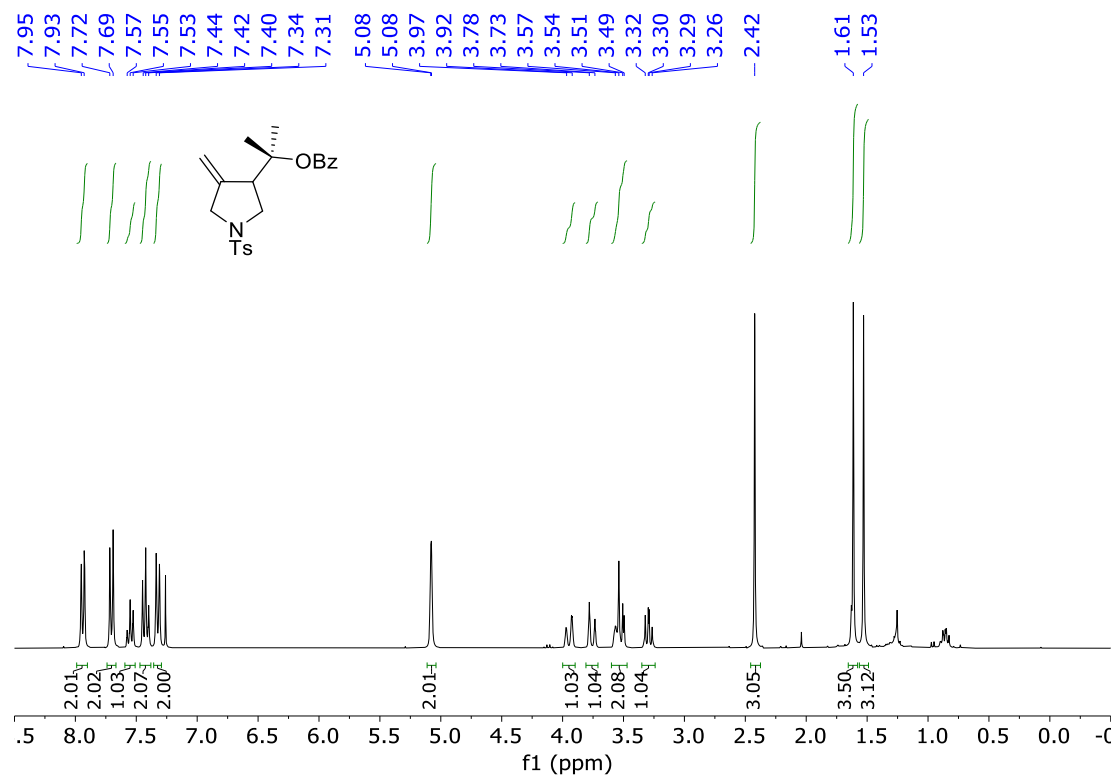

$^{13}\text{C}$  NMR (75 MHz,  $\text{CDCl}_3$ , 300 K) spectrum of **3o**

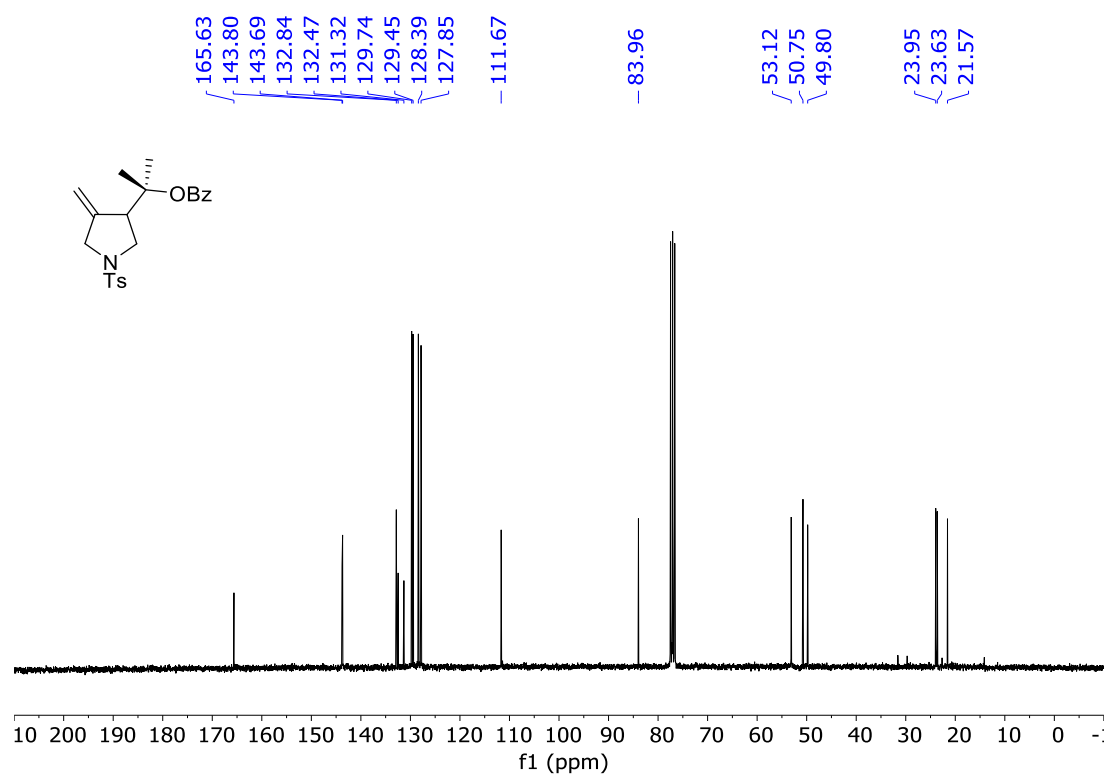

$^1\text{H}$  NMR (300 MHz,  $\text{CDCl}_3$ , 300 K) spectrum of **3p**

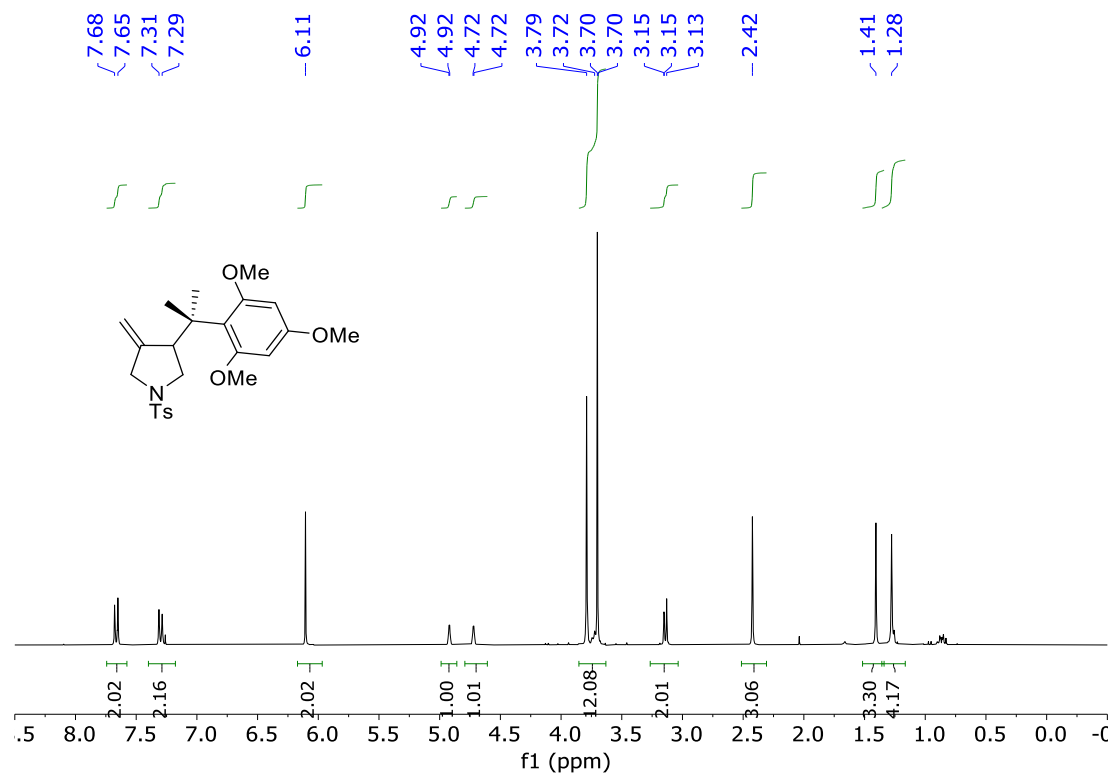

$^{13}\text{C}$  NMR (75 MHz,  $\text{CDCl}_3$ , 300 K) spectrum of **3p**

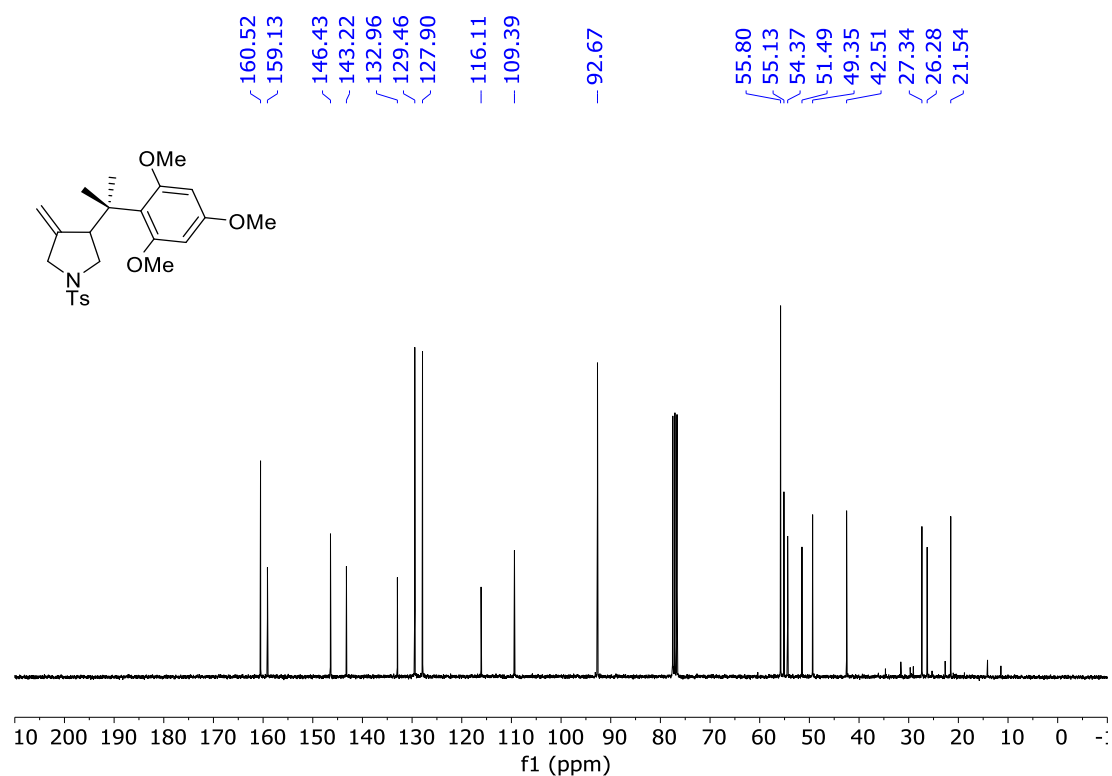



$^1\text{H}$  NMR (300 MHz,  $\text{CDCl}_3$ , 300 K) spectrum of **3q**

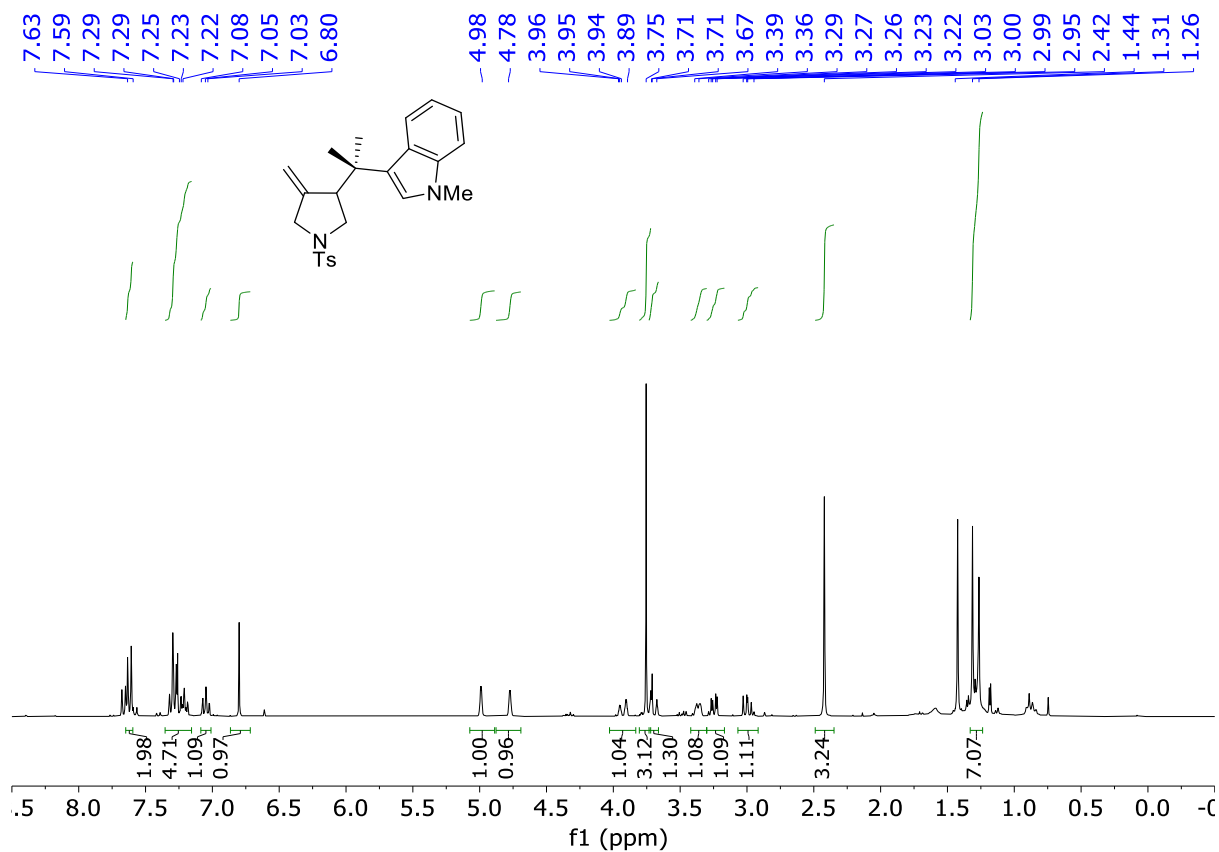

$^{13}\text{C}$  NMR (75 MHz,  $\text{CDCl}_3$ , 300 K) spectrum of **3q**

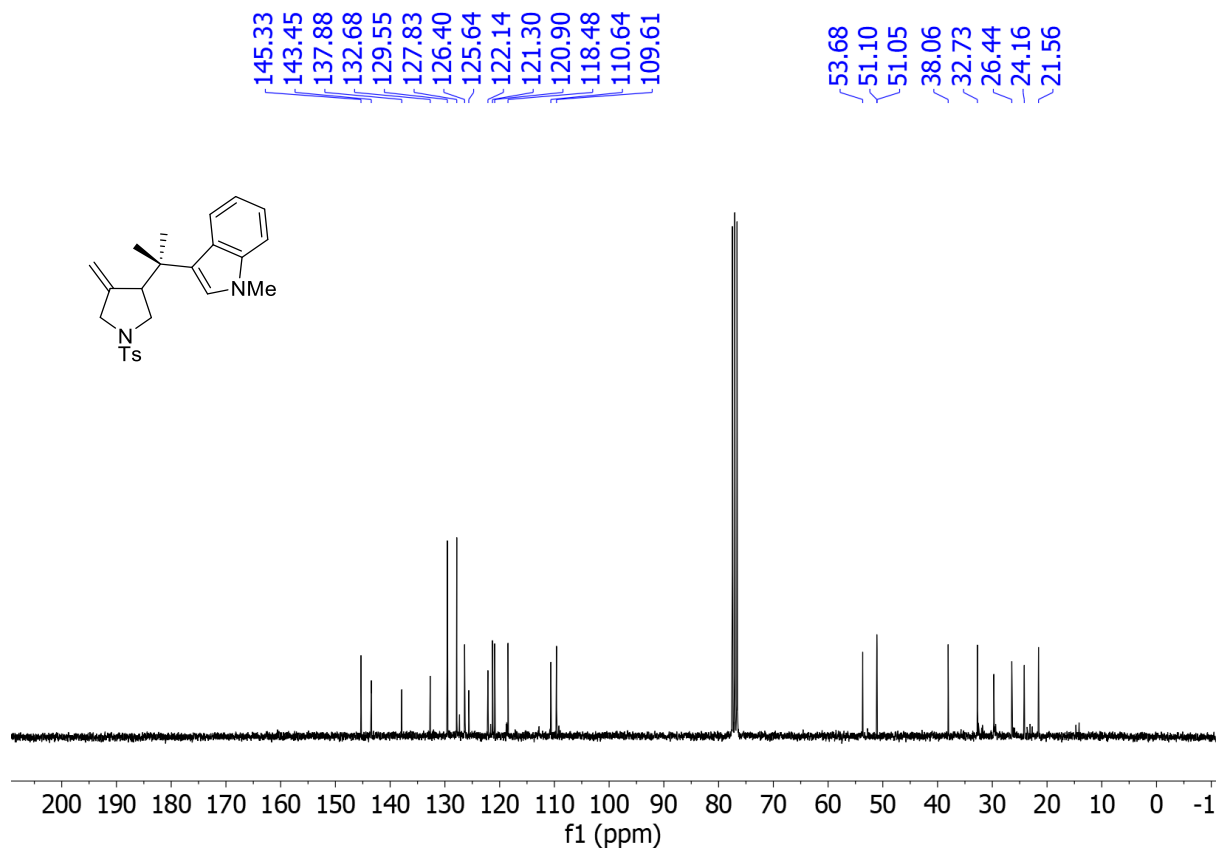

$^1\text{H}$  NMR (300 MHz,  $\text{CDCl}_3$ , 300 K) spectrum of **5a**

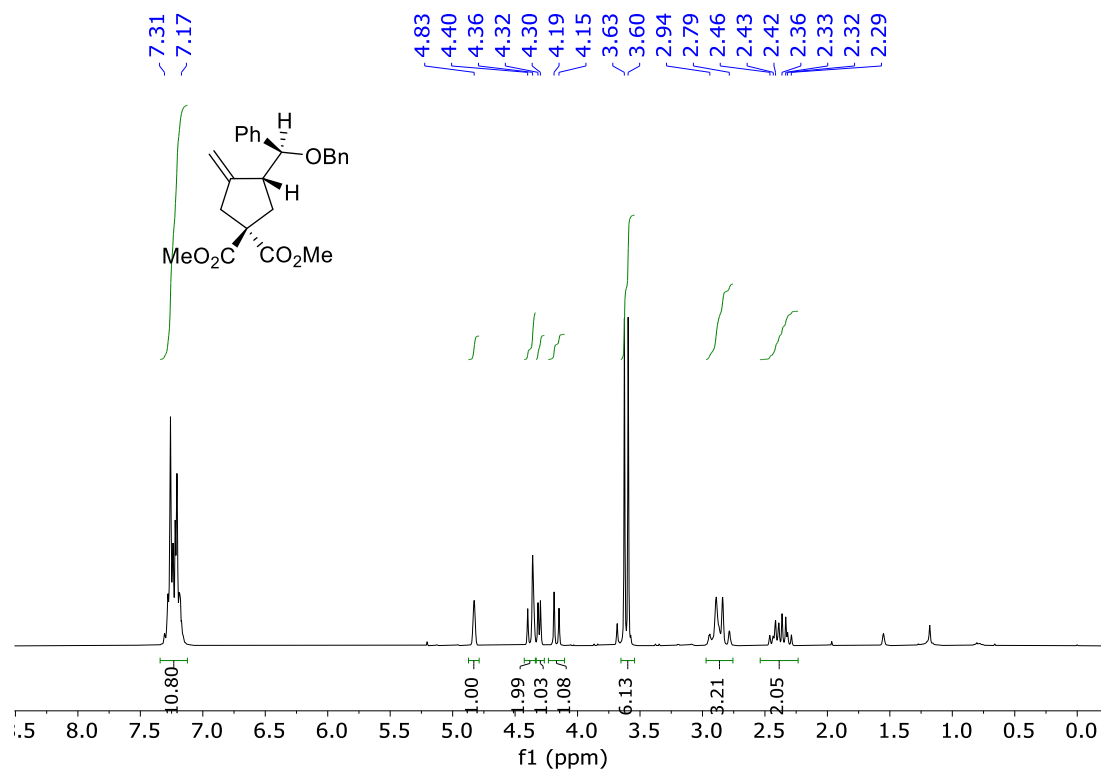

$^{13}\text{C}$  NMR (75 MHz,  $\text{CDCl}_3$ , 300 K) spectrum of **5a**

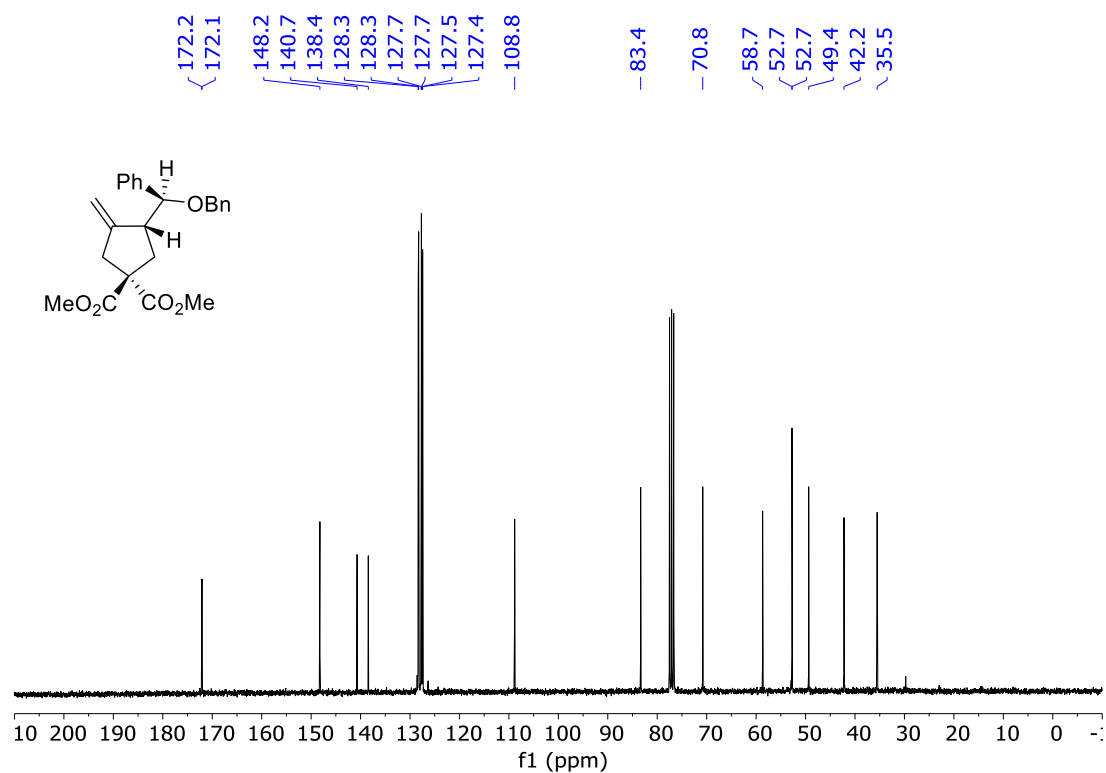

$^1\text{H}$  NMR (300 MHz,  $\text{CDCl}_3$ , 300 K) spectrum of **5b**

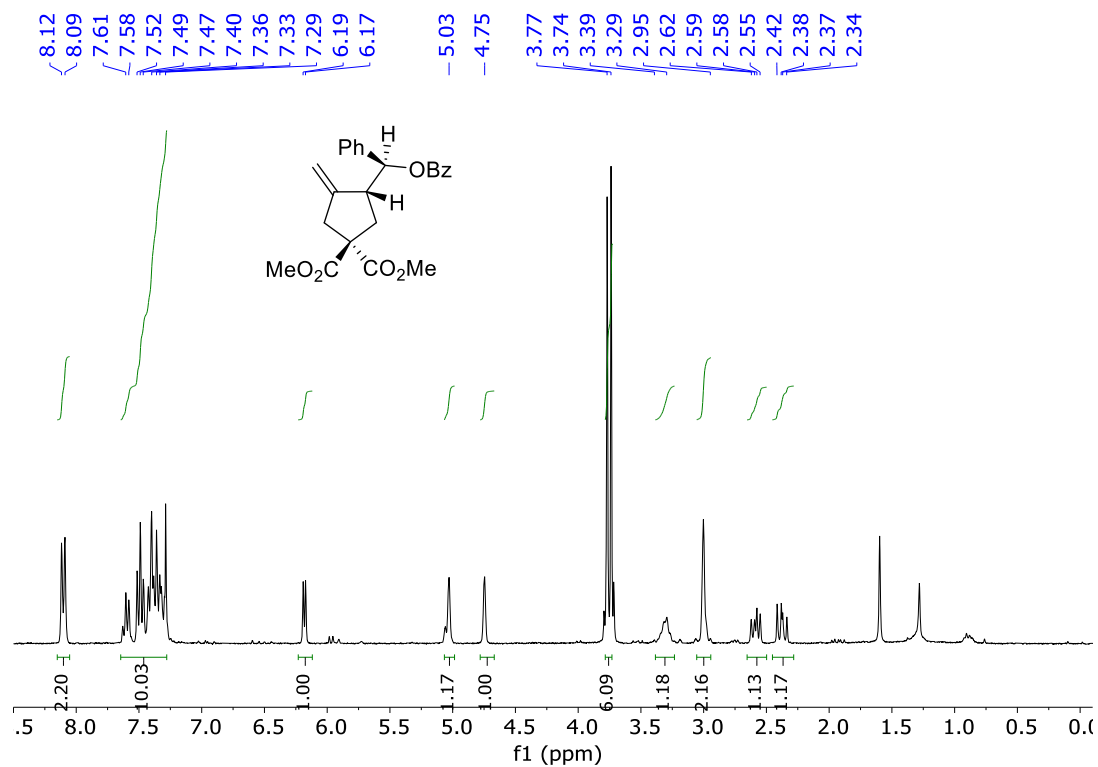

$^{13}\text{C}$  NMR (75 MHz,  $\text{CDCl}_3$ , 300 K) spectrum of **5b**

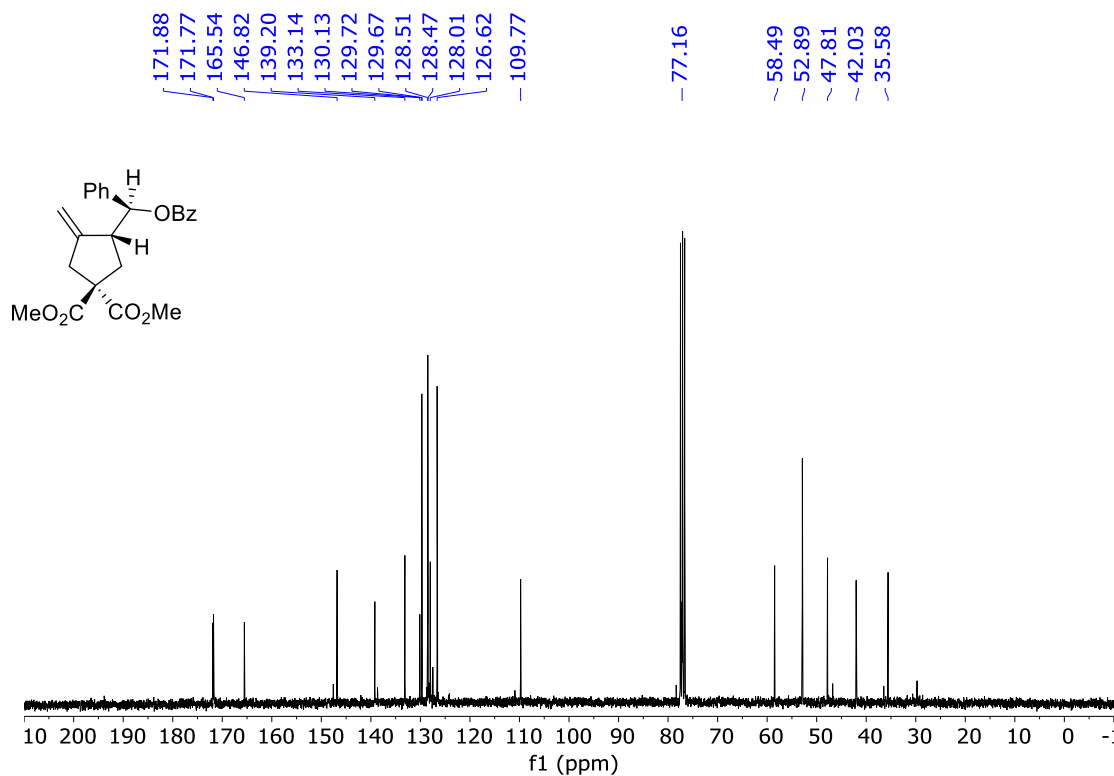

$^1\text{H}$  NMR (300 MHz,  $\text{CDCl}_3$ , 300 K) spectrum of **5c**

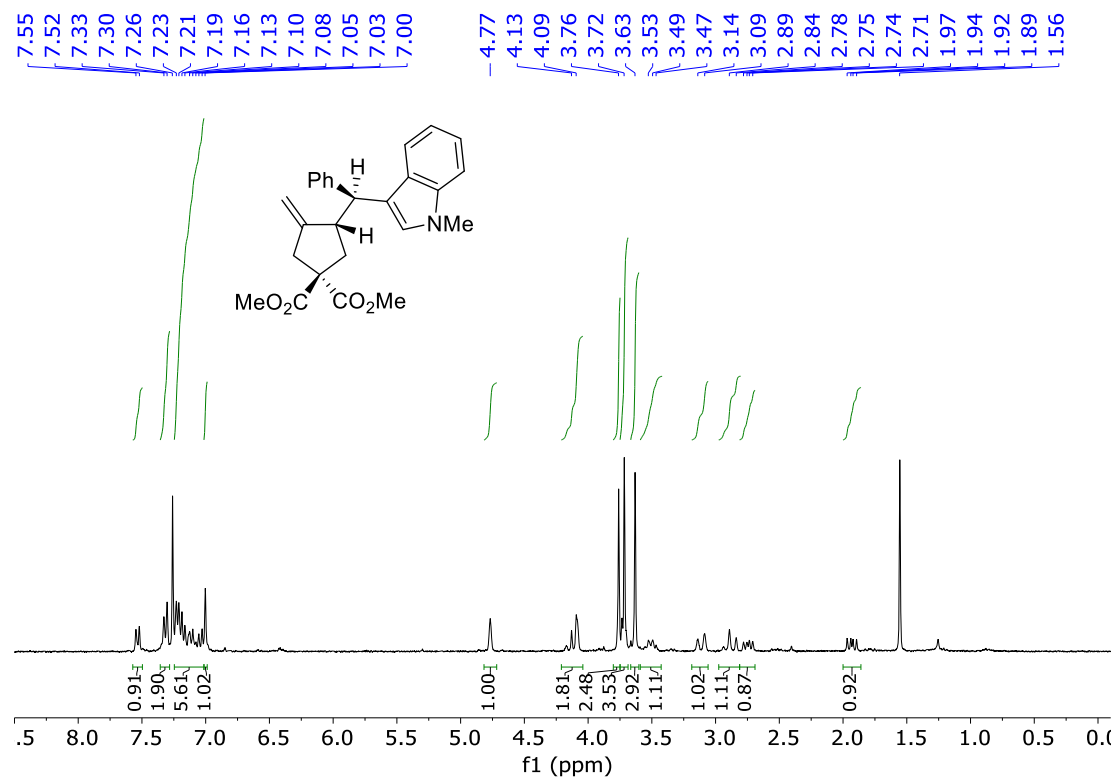

$^{13}\text{C}$  NMR (75 MHz,  $\text{CDCl}_3$ , 300 K) spectrum of **5c**

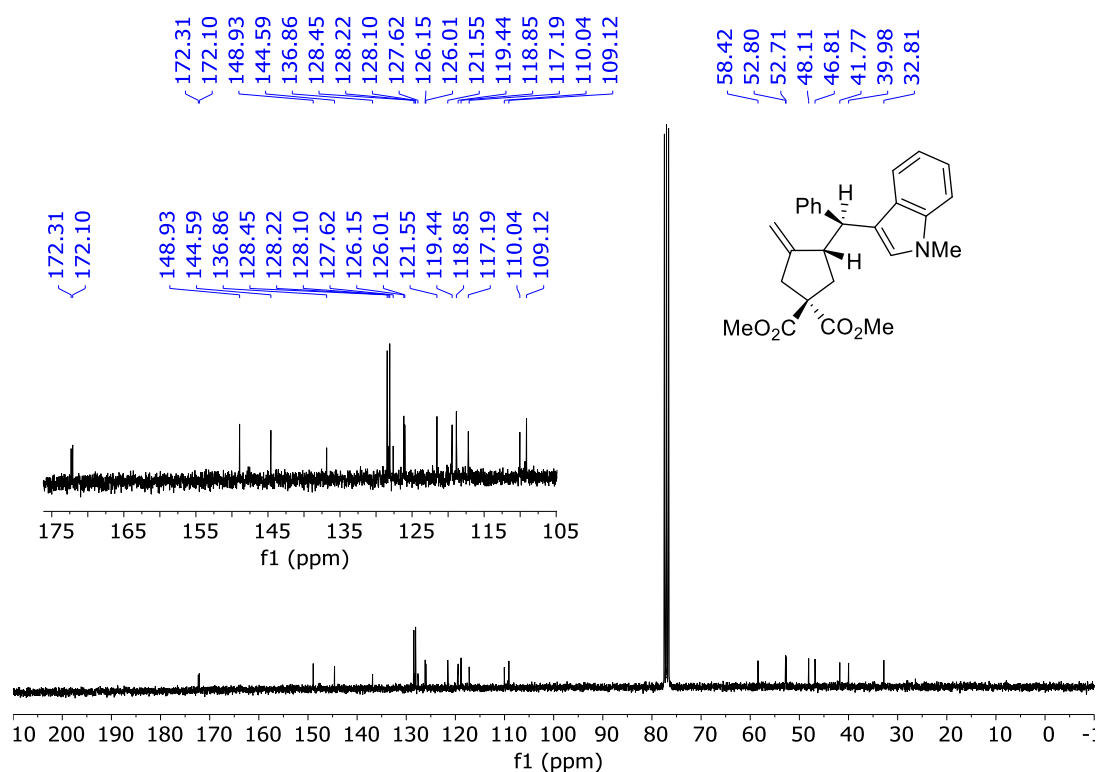

$^1\text{H}$  NMR (300 MHz,  $\text{CDCl}_3$ , 300 K) spectrum of **5d**

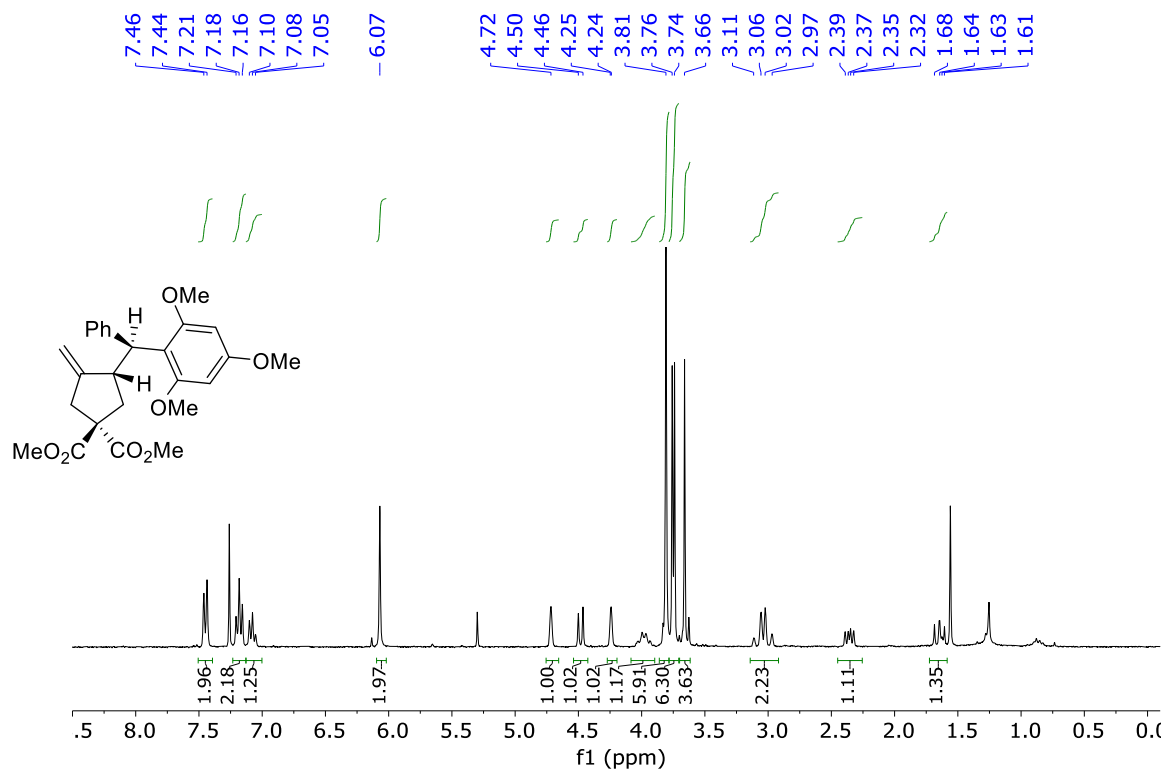

$^{13}\text{C}$  NMR (75 MHz,  $\text{CDCl}_3$ , 300 K) spectrum of **5d**

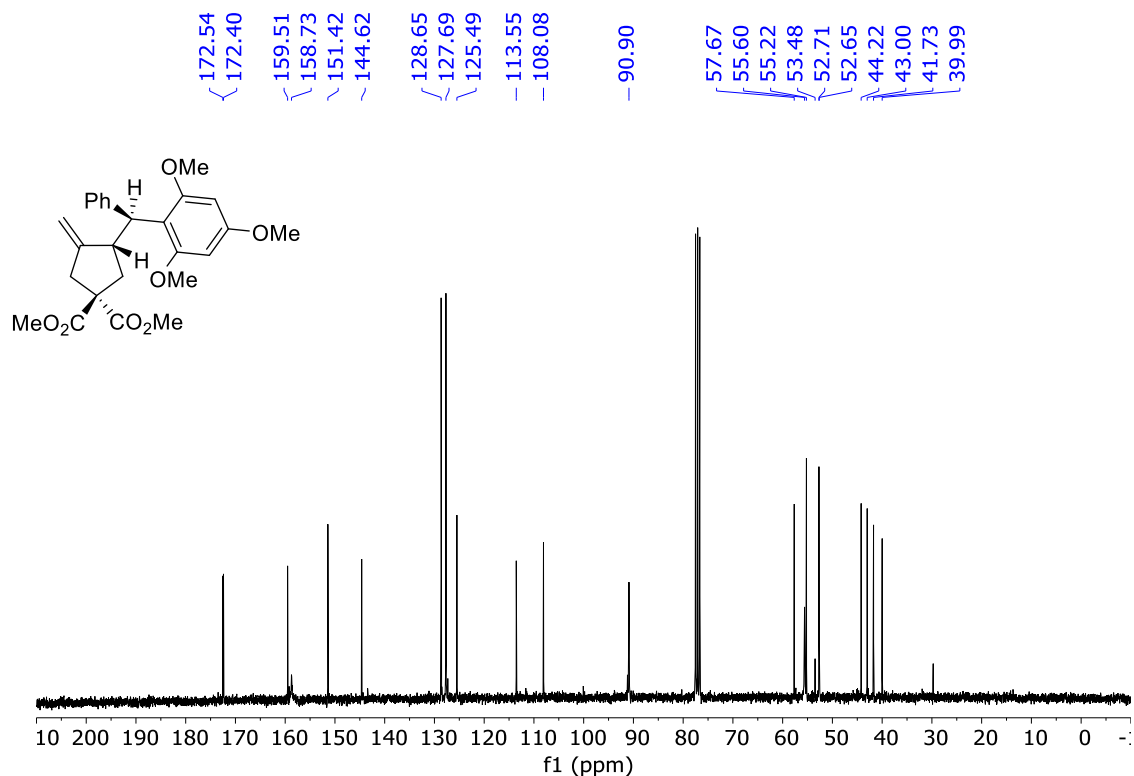

$^1\text{H}$  NMR (300 MHz,  $\text{CDCl}_3$ , 300 K) spectrum of **5e**

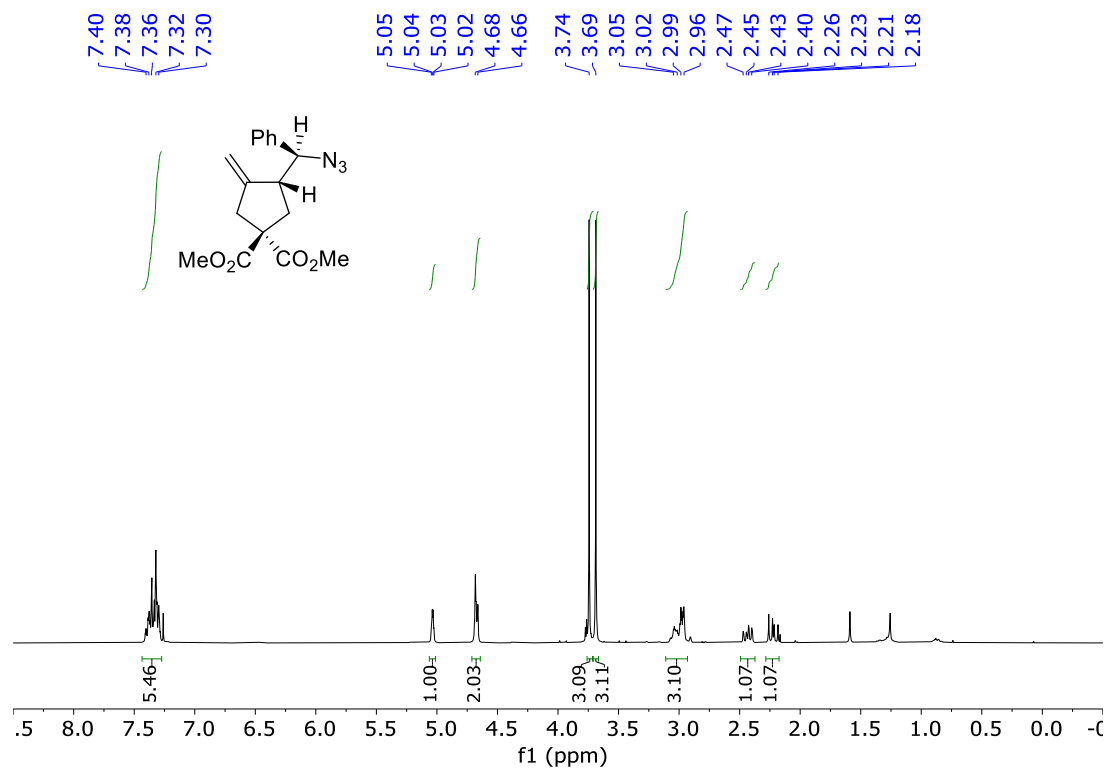

$^{13}\text{C}$  NMR (75 MHz,  $\text{CDCl}_3$ , 300 K) spectrum of **5e**

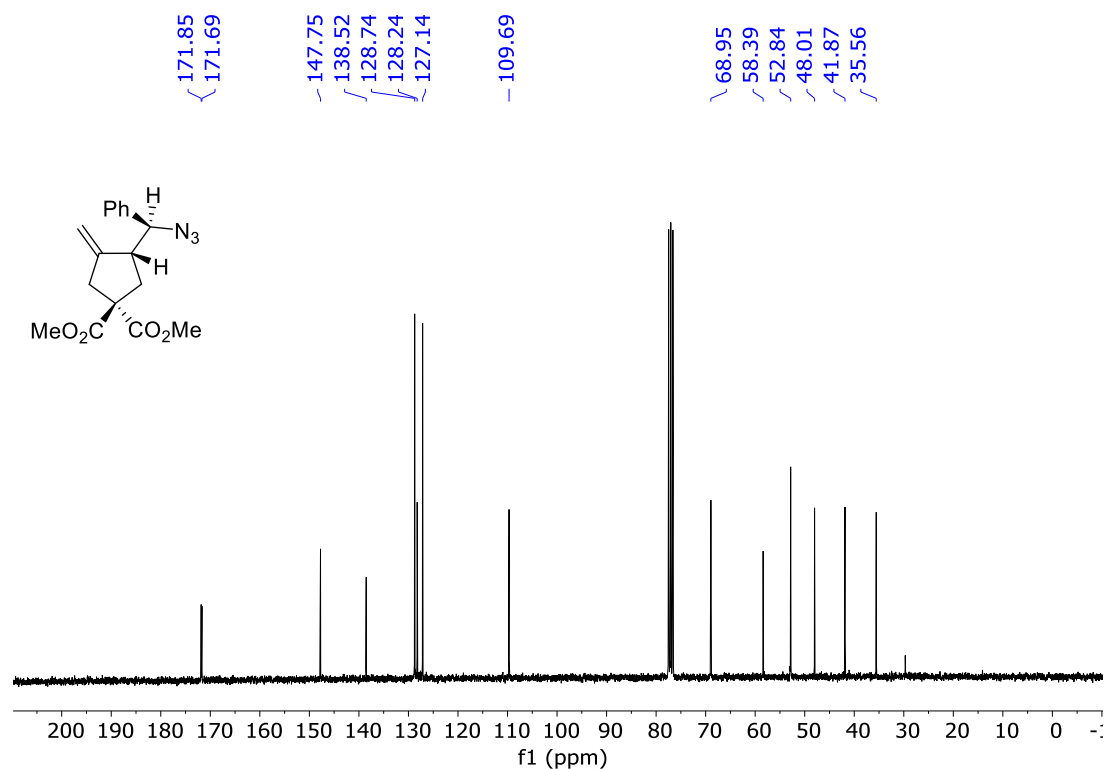

$^1\text{H}$  NMR (300 MHz,  $\text{CDCl}_3$ , 300 K) spectrum of (Z)-**3a-d**<sub>1</sub>

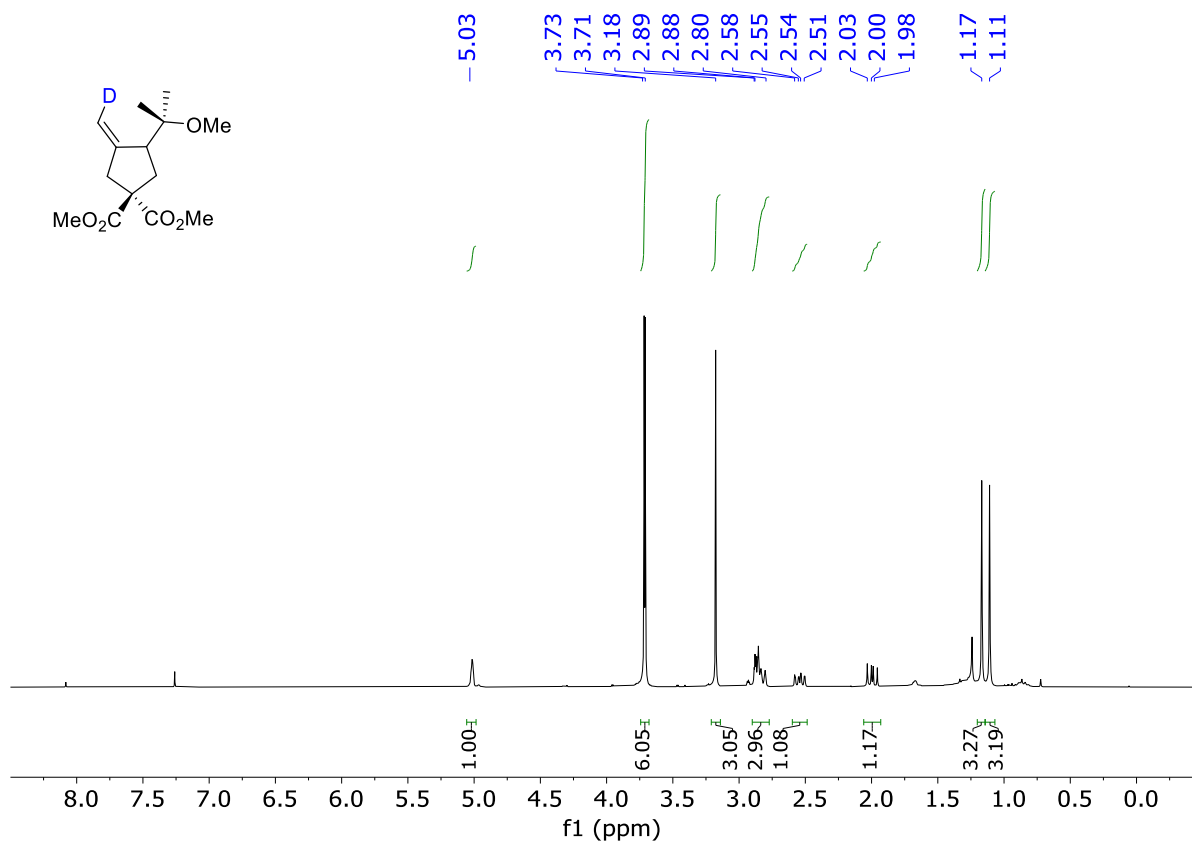

$^{13}\text{C}$  NMR (75 MHz,  $\text{CDCl}_3$ , 300 K) spectrum of (Z)-**3a-d**<sub>1</sub>

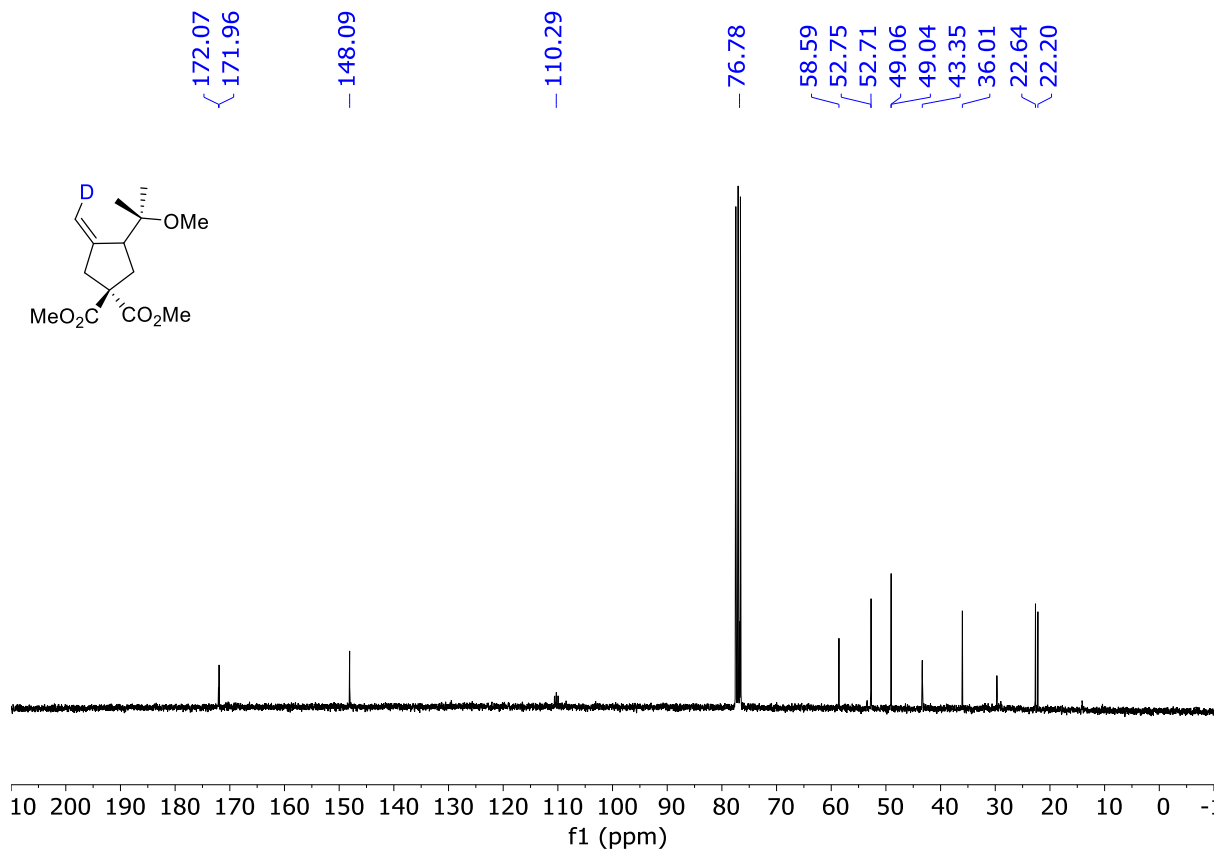

$^1\text{H}$  NMR (300 MHz,  $\text{CDCl}_3$ , 300 K) spectrum of (*E*)-**3a-d<sub>4</sub>**

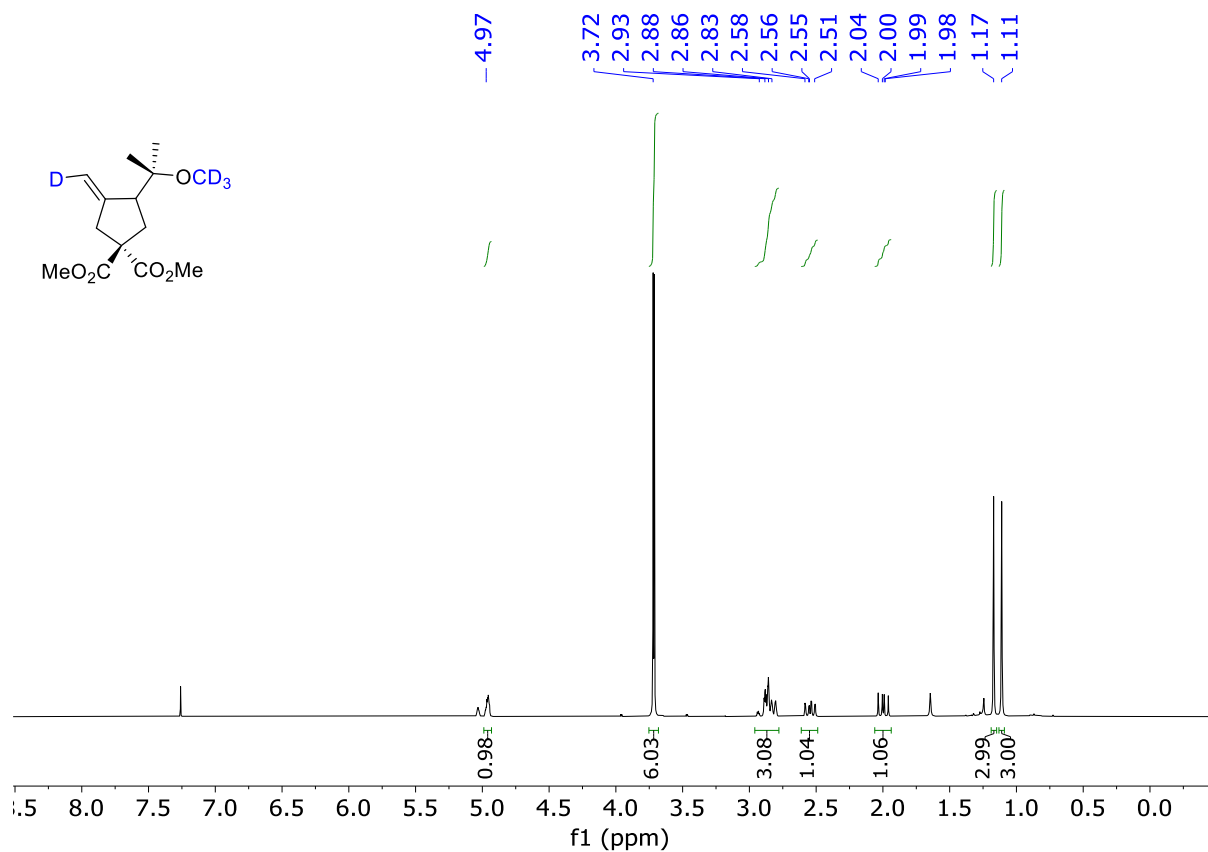

$^{13}\text{C}$  NMR (75 MHz,  $\text{CDCl}_3$ , 300 K) spectrum of (*E*)-**3a-d<sub>4</sub>**

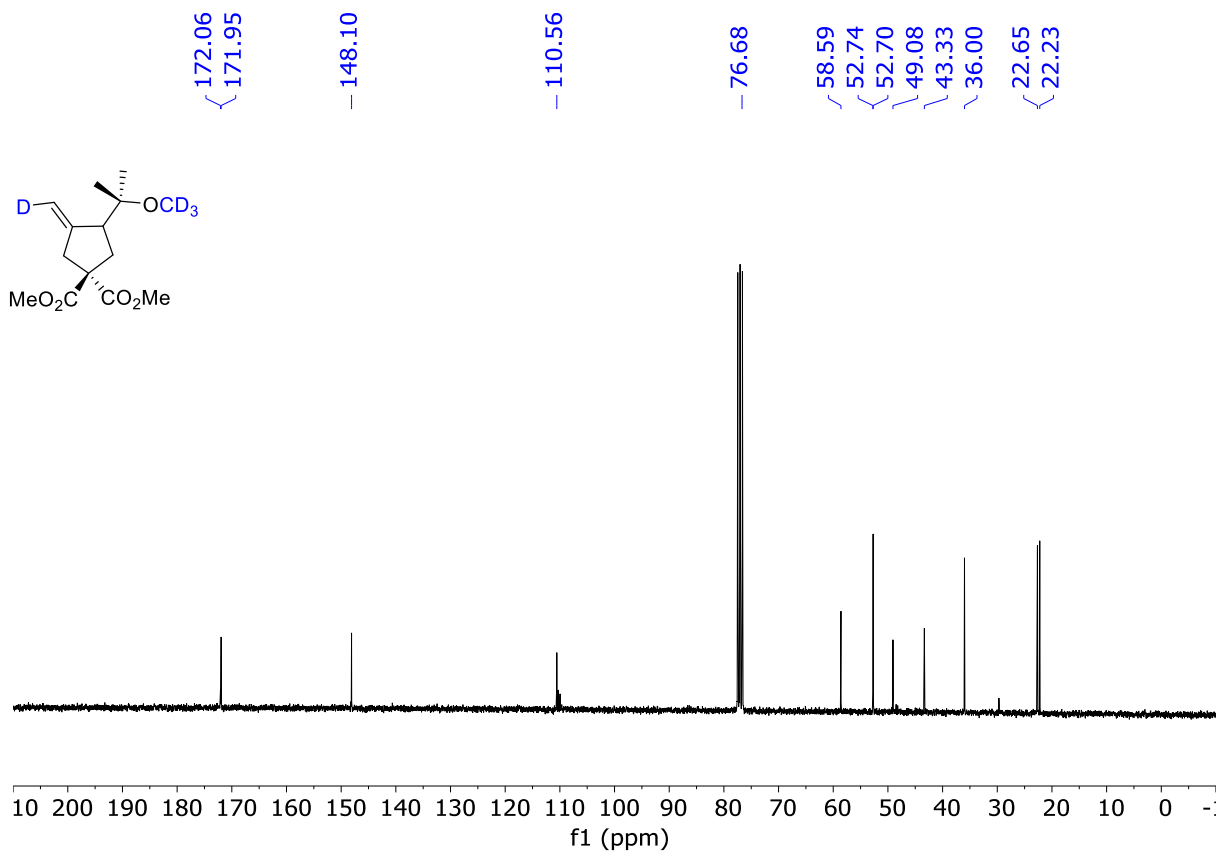

Supplement: d5qo01388g1.pdf [file d5qo01388g1.pdf]
